# Supplementary material for: Gut Microbiota Features in Young Children With Autism Spectrum Disorders
Source: Front Microbiol. 2018 Dec 19;9:3146. doi: 10.3389/fmicb.2018.03146 (PMC6305749; doi:10.3389/fmicb.2018.03146)
Supplement: Supplementary file 1 [file Table_1.xlsx]

## Sheet: Table_S1
Table S1. Comparison of relative abundances of each OTU identified in ASD patients and HCs
OTUs reported as discriminatory between ASD and HCs in both Metastats (p<0.05) and LefSe (LDA>2) analyses are highlighted in green.
OTUs reported as discriminatory in at least one analysis are highlighted in orange.
OTUs not reported as discriminatory in both analyses are highlighted in red.
#OTU ID	Taxonomy	Relative aboundance in ASD patients (%)	Relative aboundance in HCs (%)	Metastasts p-value	LefSe LDA (p-value)	More aboundant in
1712416	k__Bacteria; p__Firmicutes; c__Bacilli; o__Gemellales; f__Gemellaceae; g__Gemella; s__	0 ± 0	0.002 ± 0.001	0.000939087	2.165 (0.008)	Control
13986	k__Bacteria; p__Firmicutes; c__Clostridia; o__Clostridiales; f__Lachnospiraceae; g__; s__	0.028 ± 0.025	0 ± 0	0.000999001	2.174 (0.042)	Autistic
176994	k__Bacteria; p__Firmicutes; c__Clostridia; o__Clostridiales; f__Ruminococcaceae; g__; s__	0.09 ± 0.028	0.008 ± 0.003	0.000999001	2.632 (0)	Autistic
182052	k__Bacteria; p__Bacteroidetes; c__Bacteroidia; o__Bacteroidales; f__Bacteroidaceae; g__Bacteroides; s__	0.04 ± 0.038	0 ± 0	0.000999001	2.316 (0.042)	Autistic
189920	k__Bacteria; p__Bacteroidetes; c__Bacteroidia; o__Bacteroidales; f__Bacteroidaceae; g__Bacteroides; s__	0.118 ± 0.073	0 ± 0	0.000999001	2.784 (0.002)	Autistic
190309	k__Bacteria; p__Bacteroidetes; c__Bacteroidia; o__Bacteroidales; f__Bacteroidaceae; g__Bacteroides; s__	0.029 ± 0.016	0 ± 0	0.000999001	2.178 (0)	Autistic
193233	k__Bacteria; p__Bacteroidetes; c__Bacteroidia; o__Bacteroidales; f__Bacteroidaceae; g__Bacteroides; s__	0.052 ± 0.03	0 ± 0	0.000999001	2.421 (0.006)	Autistic
195157	k__Bacteria; p__Bacteroidetes; c__Bacteroidia; o__Bacteroidales; f__Bacteroidaceae; g__Bacteroides; s__	0.132 ± 0.093	0 ± 0	0.000999001	2.838 (0.042)	Autistic
197072	k__Bacteria; p__Bacteroidetes; c__Bacteroidia; o__Bacteroidales; f__Bacteroidaceae; g__Bacteroides; s__uniformis	0.079 ± 0.039	0 ± 0	0.000999001	2.603 (0.006)	Autistic
198198	k__Bacteria; p__Firmicutes; c__Clostridia; o__Clostridiales; f__Ruminococcaceae; g__; s__	0.03 ± 0.01	0.002 ± 0.001	0.000999001	2.181 (0)	Autistic
198449	k__Bacteria; p__Bacteroidetes; c__Bacteroidia; o__Bacteroidales; f__Bacteroidaceae; g__Bacteroides; s__	0.047 ± 0.033	0 ± 0	0.000999001	2.375 (0.006)	Autistic
289725	k__Bacteria; p__Firmicutes; c__Clostridia; o__Clostridiales; f__Lachnospiraceae; g__[Ruminococcus]; s__	0.018 ± 0.016	0 ± 0	0.000999001	2.036 (0.016)	Autistic
299267	k__Bacteria; p__Proteobacteria; c__Gammaproteobacteria; o__Enterobacteriales; f__Enterobacteriaceae; g__; s__	0.046 ± 0.029	0 ± 0	0.000999001	2.419 (0.006)	Autistic
518002	k__Bacteria; p__Proteobacteria; c__Gammaproteobacteria; o__Enterobacteriales; f__Enterobacteriaceae; g__; s__	0.047 ± 0.046	0 ± 0	0.000999001	2.391 (0.016)	Autistic
577170	k__Bacteria; p__Bacteroidetes; c__Bacteroidia; o__Bacteroidales; f__Bacteroidaceae; g__Bacteroides; s__	0.055 ± 0.033	0 ± 0	0.000999001	2.451 (0.017)	Autistic
2331530	k__Bacteria; p__Bacteroidetes; c__Bacteroidia; o__Bacteroidales; f__Bacteroidaceae; g__Bacteroides; s__	0.084 ± 0.042	0 ± 0	0.000999001	2.634 (0.002)	Autistic
2949328	k__Bacteria; p__Bacteroidetes; c__Bacteroidia; o__Bacteroidales; f__Bacteroidaceae; g__Bacteroides; s__	0.044 ± 0.043	0 ± 0	0.000999001	2.372 (0.042)	Autistic
3472078	k__Bacteria; p__Bacteroidetes; c__Bacteroidia; o__Bacteroidales; f__Bacteroidaceae; g__Bacteroides; s__	0.024 ± 0.01	0 ± 0	0.000999001	2.107 (0.002)	Autistic
3486634	k__Bacteria; p__Bacteroidetes; c__Bacteroidia; o__Bacteroidales; f__Bacteroidaceae; g__Bacteroides; s__	0.021 ± 0.015	0 ± 0	0.000999001	2.11 (0.042)	Autistic
3825935	k__Bacteria; p__Proteobacteria; c__Gammaproteobacteria; o__Pasteurellales; f__Pasteurellaceae; g__; s__	0.057 ± 0.049	0 ± 0	0.000999001	2.552 (0.042)	Autistic
4278525	k__Bacteria; p__Bacteroidetes; c__Bacteroidia; o__Bacteroidales; f__Bacteroidaceae; g__Bacteroides; s__	0.054 ± 0.048	0 ± 0	0.000999001	2.438 (0.006)	Autistic
4354042	k__Bacteria; p__Bacteroidetes; c__Bacteroidia; o__Bacteroidales; f__Bacteroidaceae; g__Bacteroides; s__	0.031 ± 0.021	0 ± 0	0.000999001	2.203 (0.016)	Autistic
4357712	k__Bacteria; p__Bacteroidetes; c__Bacteroidia; o__Bacteroidales; f__Bacteroidaceae; g__Bacteroides; s__	0.274 ± 0.254	0 ± 0	0.000999001	3.093 (0.002)	Autistic
4402960	k__Bacteria; p__Bacteroidetes; c__Bacteroidia; o__Bacteroidales; f__Bacteroidaceae; g__Bacteroides; s__uniformis	0.216 ± 0.133	0.001 ± 0.001	0.000999001	3.043 (0.007)	Autistic
4428929	k__Bacteria; p__Bacteroidetes; c__Bacteroidia; o__Bacteroidales; f__Bacteroidaceae; g__Bacteroides; s__caccae	0.026 ± 0.026	0 ± 0	0.000999001	2.143 (0.042)	Autistic
289734	k__Bacteria; p__Firmicutes; c__Clostridia; o__Clostridiales; f__Lachnospiraceae; g__; s__	0.001 ± 0	0.004 ± 0.001	0.000999001	2.058 (0.001)	Control
1089121	k__Bacteria; p__Actinobacteria; c__Actinobacteria; o__Actinomycetales; f__Actinomycetaceae; g__Actinomyces; s__	0.002 ± 0.001	0.039 ± 0.02	0.000999001	2.34 (0.009)	Control
4325275	k__Bacteria; p__Firmicutes; c__Bacilli; o__Lactobacillales; f__Streptococcaceae; g__Streptococcus; s__	0.011 ± 0.003	0.082 ± 0.017	0.000999001	2.579 (0)	Control
4346614	k__Bacteria; p__Firmicutes; c__Bacilli; o__Lactobacillales; f__Streptococcaceae; g__Streptococcus; s__	0 ± 0	0.003 ± 0.001	0.000999001	2.246 (0.004)	Control
4346977	k__Bacteria; p__Firmicutes; c__Bacilli; o__Lactobacillales; f__Streptococcaceae; g__Streptococcus; s__	0.001 ± 0	0.009 ± 0.002	0.000999001	2.004 (0.001)	Control
174818	k__Bacteria; p__Firmicutes; c__Clostridia; o__Clostridiales; f__Ruminococcaceae; g__; s__	0.036 ± 0.008	0.006 ± 0.004	0.001998	2.2 (0)	Autistic
175535	k__Bacteria; p__Bacteroidetes; c__Bacteroidia; o__Bacteroidales; f__Bacteroidaceae; g__Bacteroides; s__	0.022 ± 0.01	0 ± 0	0.001998	2.057 (0.007)	Autistic
191660	k__Bacteria; p__Firmicutes; c__Clostridia; o__Clostridiales; f__Ruminococcaceae; g__Faecalibacterium; s__prausnitzii	0.022 ± 0.008	0.002 ± 0.001	0.001998	2.036 (0.003)	Autistic
3154070	k__Bacteria; p__Bacteroidetes; c__Bacteroidia; o__Bacteroidales; f__Bacteroidaceae; g__Bacteroides; s__	0.09 ± 0.043	0 ± 0	0.001998	2.661 (0.006)	Autistic
4439469	k__Bacteria; p__Firmicutes; c__Clostridia; o__Clostridiales; f__Ruminococcaceae; g__; s__	0.315 ± 0.095	0.044 ± 0.01	0.001998	3.1 (0.014)	Autistic
183057	k__Bacteria; p__Firmicutes; c__Clostridia; o__Clostridiales; f__Lachnospiraceae; g__Coprococcus; s__	0.007 ± 0.003	0.048 ± 0.011	0.001998	2.352 (0.002)	Control
197603	k__Bacteria; p__Firmicutes; c__Clostridia; o__Clostridiales; f__Lachnospiraceae; g__Coprococcus; s__	0.027 ± 0.01	0.168 ± 0.039	0.001998	2.876 (0.002)	Control
4392549	k__Bacteria; p__Firmicutes; c__Bacilli; o__Lactobacillales; f__Streptococcaceae; g__Streptococcus; s__	0.043 ± 0.022	0.463 ± 0.103	0.001998	3.333 (0.001)	Control
189937	k__Bacteria; p__Firmicutes; c__Clostridia; o__Clostridiales; f__Ruminococcaceae; g__Faecalibacterium; s__prausnitzii	0.031 ± 0.01	0.003 ± 0.001	0.002997	2.152 (0.001)	Autistic
3021821	k__Bacteria; p__Firmicutes; c__Clostridia; o__Clostridiales; f__Lachnospiraceae; g__[Ruminococcus]; s__	0.028 ± 0.013	0 ± 0	0.002997	2.153 (0.008)	Autistic
196942	k__Bacteria; p__Firmicutes; c__Clostridia; o__Clostridiales; f__Lachnospiraceae; g__Blautia; s__	0.08 ± 0.023	0.223 ± 0.046	0.002997	2.898 (0.011)	Control
989579	k__Bacteria; p__Firmicutes; c__Bacilli; o__Lactobacillales; f__Streptococcaceae; g__Streptococcus; s__	0 ± 0	0.002 ± 0.001	0.00349339	2.391 (0.031)	Control
528362	k__Bacteria; p__Firmicutes; c__Clostridia; o__Clostridiales; f__Lachnospiraceae; g__Roseburia; s__	0.058 ± 0.049	0 ± 0	0.003996	2.466 (0.005)	Autistic
4393532	k__Bacteria; p__Actinobacteria; c__Coriobacteriia; o__Coriobacteriales; f__Coriobacteriaceae; g__Eggerthella; s__lenta	0.081 ± 0.031	0.408 ± 0.113	0.003996	3.236 (0.007)	Control
4439603	k__Bacteria; p__Firmicutes; c__Bacilli; o__Lactobacillales; f__Streptococcaceae; g__Streptococcus; s__	0.008 ± 0.004	0.141 ± 0.051	0.003996	2.851 (0.006)	Control
193008	k__Bacteria; p__Firmicutes; c__Clostridia; o__Clostridiales; f__Ruminococcaceae; g__; s__	0.036 ± 0.016	0.001 ± 0.001	0.004995	2.258 (0.002)	Autistic
196957	k__Bacteria; p__Firmicutes; c__Clostridia; o__Clostridiales; f__Ruminococcaceae; g__; s__	0.049 ± 0.02	0.004 ± 0.002	0.004995	2.376 (0.008)	Autistic
267718	k__Bacteria; p__Firmicutes; c__Clostridia; o__Clostridiales; f__Ruminococcaceae; g__; s__	0.021 ± 0.016	0 ± 0	0.004995	2.037 (0.001)	Autistic
3600504	k__Bacteria; p__Bacteroidetes; c__Bacteroidia; o__Bacteroidales; f__Bacteroidaceae; g__Bacteroides; s__	0.051 ± 0.026	0 ± 0	0.004995	2.416 (0.045)	Autistic
4443846	k__Bacteria; p__Firmicutes; c__Clostridia; o__Clostridiales; f__Lachnospiraceae; g__[Ruminococcus]; s__	0.375 ± 0.158	0.037 ± 0.015	0.00599401	3.238 (0.005)	Autistic
197208	k__Bacteria; p__Firmicutes; c__Clostridia; o__Clostridiales; f__Lachnospiraceae; g__Blautia; s__	0.125 ± 0.041	0.338 ± 0.055	0.00599401	3.054 (0.007)	Control
360890	k__Bacteria; p__Firmicutes; c__Clostridia; o__Clostridiales; f__; g__; s__	0 ± 0	0.001 ± 0.001	0.00603413	2.098 (0.031)	Control
2819725	k__Bacteria; p__Firmicutes; c__Bacilli; o__Lactobacillales; f__Streptococcaceae; g__Streptococcus; s__	0 ± 0	0.001 ± 0	0.00603413	2.106 (0.007)	Control
4294749	k__Bacteria; p__Actinobacteria; c__Actinobacteria; o__Actinomycetales; f__Actinomycetaceae; g__Actinomyces; s__	0 ± 0	0.001 ± 0.001	0.00603413	2.029 (0.031)	Control
189092	k__Bacteria; p__Firmicutes; c__Clostridia; o__Clostridiales; f__Ruminococcaceae; g__Faecalibacterium; s__prausnitzii	0.044 ± 0.015	0.005 ± 0.002	0.00699301	2.296 (0.003)	Autistic
195651	k__Bacteria; p__Firmicutes; c__Clostridia; o__Clostridiales; f__Ruminococcaceae; g__; s__	0.026 ± 0.012	0.004 ± 0.002	0.00699301	2.063 (0.003)	Autistic
181853	k__Bacteria; p__Firmicutes; c__Clostridia; o__Clostridiales; f__Lachnospiraceae; g__Coprococcus; s__	0.017 ± 0.006	0.062 ± 0.013	0.00699301	2.384 (0.008)	Control
192958	k__Bacteria; p__Firmicutes; c__Clostridia; o__Clostridiales; f__Lachnospiraceae; g__Coprococcus; s__	0 ± 0	0.003 ± 0.001	0.00699301	2.065 (0.028)	Control
1076668	k__Bacteria; p__Firmicutes; c__Bacilli; o__Lactobacillales; f__Aerococcaceae; g__; s__	0.006 ± 0.002	0.059 ± 0.027	0.00699301	2.472 (0.047)	Control
4320317	k__Bacteria; p__Firmicutes; c__Bacilli; o__Lactobacillales; f__Streptococcaceae; g__Streptococcus; s__	0.002 ± 0.001	0.009 ± 0.002	0.00699301	2.026 (0.009)	Control
4404731	k__Bacteria; p__Actinobacteria; c__Actinobacteria; o__Actinomycetales; f__Corynebacteriaceae; g__Corynebacterium; s__	0.001 ± 0.001	0.021 ± 0.007	0.00699301	2.062 (0.022)	Control
182577	k__Bacteria; p__Firmicutes; c__Clostridia; o__Clostridiales; f__Ruminococcaceae; g__; s__	0.035 ± 0.015	0.004 ± 0.002	0.00799201	2.217 (0.012)	Autistic
179623	k__Bacteria; p__Firmicutes; c__Clostridia; o__Clostridiales; f__Lachnospiraceae; g__Blautia; s__	0.113 ± 0.038	0.47 ± 0.111	0.00799201	3.246 (0.016)	Control
196656	k__Bacteria; p__Firmicutes; c__Clostridia; o__Clostridiales; f__Lachnospiraceae; g__Blautia; s__	0.469 ± 0.176	1.243 ± 0.199	0.00799201	3.62 (0.007)	Control
181754	k__Bacteria; p__Firmicutes; c__Clostridia; o__Clostridiales; f__Ruminococcaceae; g__; s__	0.031 ± 0.011	0.005 ± 0.003	0.00899101	2.149 (0.005)	Autistic
189984	k__Bacteria; p__Firmicutes; c__Clostridia; o__Clostridiales; f__Ruminococcaceae; g__Faecalibacterium; s__prausnitzii	0.032 ± 0.02	0.002 ± 0.001	0.00899101	2.211 (0.004)	Autistic
187533	k__Bacteria; p__Firmicutes; c__Clostridia; o__Clostridiales; f__Lachnospiraceae; g__Blautia; s__	0 ± 0	0.002 ± 0.001	0.00899101	2.004 (0.016)	Control
1074210	k__Bacteria; p__Firmicutes; c__Bacilli; o__Gemellales; f__Gemellaceae; g__; s__	0 ± 0	0.003 ± 0.001	0.00899101	2.027 (0.016)	Control
183496	k__Bacteria; p__Bacteroidetes; c__Bacteroidia; o__Bacteroidales; f__Bacteroidaceae; g__Bacteroides; s__	0.026 ± 0.016	0 ± 0	0.00999001	2.129 (0.045)	Autistic
366794	k__Bacteria; p__Firmicutes; c__Clostridia; o__Clostridiales; f__Ruminococcaceae; g__; s__	0.045 ± 0.019	0.005 ± 0.003	0.00999001	2.323 (0.002)	Autistic
1504042	k__Bacteria; p__Firmicutes; c__Clostridia; o__Clostridiales; f__Ruminococcaceae; g__Oscillospira; s__	0.535 ± 0.265	0.043 ± 0.014	0.00999001	3.395 (0.014)	Autistic
2407149	k__Bacteria; p__Firmicutes; c__Clostridia; o__Clostridiales; f__Lachnospiraceae; g__Lachnospira; s__	0.039 ± 0.032	0.001 ± 0.001	0.00999001	2.283 (0.002)	Autistic
180633	k__Bacteria; p__Firmicutes; c__Clostridia; o__Clostridiales; f__Lachnospiraceae; g__Blautia; s__	0.046 ± 0.016	0.159 ± 0.035	0.00999001	2.744 (0.014)	Control
195728	k__Bacteria; p__Firmicutes; c__Clostridia; o__Clostridiales; f__Lachnospiraceae; g__Coprococcus; s__	0 ± 0	0.021 ± 0.017	0.00999001	2.172 (0.031)	Control
183162	k__Bacteria; p__Firmicutes; c__Clostridia; o__Clostridiales; f__Ruminococcaceae; g__Oscillospira; s__	0.607 ± 0.193	0.103 ± 0.04	0.010989	3.395 (0.015)	Autistic
197282	k__Bacteria; p__Firmicutes; c__Clostridia; o__Clostridiales; f__Lachnospiraceae; g__Blautia; s__	0.042 ± 0.015	0.109 ± 0.02	0.010989	2.565 (0.01)	Control
173824	k__Bacteria; p__Firmicutes; c__Clostridia; o__Clostridiales; f__Lachnospiraceae; g__; s__	0 ± 0	0.001 ± 0	0.0110763	2.371 (0.007)	Control
875735	k__Bacteria; p__Actinobacteria; c__Actinobacteria; o__Actinomycetales; f__Actinomycetaceae; g__Actinomyces; s__	0 ± 0	0.001 ± 0.001	0.0110763	2.022 (0.031)	Control
193644	k__Bacteria; p__Firmicutes; c__Clostridia; o__Clostridiales; f__Ruminococcaceae; g__; s__	0.034 ± 0.01	0.007 ± 0.003	0.011988	2.141 (0.016)	Autistic
4111715	k__Bacteria; p__Proteobacteria; c__Gammaproteobacteria; o__Enterobacteriales; f__Enterobacteriaceae; g__; s__	0.282 ± 0.274	0 ± 0	0.012987	3.23 (0.003)	Autistic
232900	k__Bacteria; p__Actinobacteria; c__Coriobacteriia; o__Coriobacteriales; f__Coriobacteriaceae; g__; s__	0 ± 0	0.026 ± 0.016	0.012987	2.112 (0.049)	Control
180563	k__Bacteria; p__Firmicutes; c__Clostridia; o__Clostridiales; f__Ruminococcaceae; g__; s__	0.026 ± 0.012	0.003 ± 0.001	0.014985	2.027 (0.048)	Autistic
194672	k__Bacteria; p__Firmicutes; c__Clostridia; o__Clostridiales; f__Ruminococcaceae; g__; s__	0.042 ± 0.015	0.005 ± 0.003	0.014985	2.307 (0.001)	Autistic
364227	k__Bacteria; p__Firmicutes; c__Clostridia; o__Clostridiales; f__; g__; s__	0.05 ± 0.034	0.003 ± 0.002	0.014985	2.393 (0.001)	Autistic
197222	k__Bacteria; p__Firmicutes; c__Clostridia; o__Clostridiales; f__Lachnospiraceae; g__Blautia; s__	0.086 ± 0.031	0.21 ± 0.034	0.014985	2.829 (0.011)	Control
213885	k__Bacteria; p__Firmicutes; c__Clostridia; o__Clostridiales; f__Ruminococcaceae; g__Oscillospira; s__	0.06 ± 0.038	0.006 ± 0.003	0.015984	2.426 (0.012)	Autistic
198584	k__Bacteria; p__Firmicutes; c__Clostridia; o__Clostridiales; f__Lachnospiraceae; g__Blautia; s__	0.021 ± 0.007	0.053 ± 0.009	0.015984	2.256 (0.011)	Control
192308	k__Bacteria; p__Firmicutes; c__Clostridia; o__Clostridiales; f__; g__; s__	0.001 ± 0	0 ± 0	0.0164914	2.186 (0.006)	Autistic
333341	k__Bacteria; p__Firmicutes; c__Clostridia; o__Clostridiales; f__Lachnospiraceae; g__; s__	0.001 ± 0	0 ± 0	0.0164914	2.023 (0.016)	Autistic
189674	k__Bacteria; p__Firmicutes; c__Clostridia; o__Clostridiales; f__Ruminococcaceae; g__; s__	0.024 ± 0.012	0.001 ± 0.001	0.017982	2.041 (0.033)	Autistic
183662	k__Bacteria; p__Bacteroidetes; c__Bacteroidia; o__Bacteroidales; f__Bacteroidaceae; g__Bacteroides; s__	0.088 ± 0.076	0.001 ± 0	0.018981	2.658 (0.019)	Autistic
191595	k__Bacteria; p__Actinobacteria; c__Coriobacteriia; o__Coriobacteriales; f__Coriobacteriaceae; g__Collinsella; s__aerofaciens	0.001 ± 0	0.003 ± 0.001	0.01998	2.057 (0.04)	Control
192218	k__Bacteria; p__Firmicutes; c__Clostridia; o__Clostridiales; f__Lachnospiraceae; g__Coprococcus; s__	0 ± 0	0.001 ± 0.001	0.0204634	2.024 (0.031)	Control
196054	k__Bacteria; p__Firmicutes; c__Clostridia; o__Clostridiales; f__Lachnospiraceae; g__; s__	0 ± 0	0.001 ± 0	0.0204634	2.479 (0.031)	Control
4455767	k__Bacteria; p__Firmicutes; c__Bacilli; o__Lactobacillales; f__Streptococcaceae; g__Streptococcus; s__	0 ± 0	0.001 ± 0	0.0204634	2.543 (0.015)	Control
606927	k__Bacteria; p__Firmicutes; c__Clostridia; o__Clostridiales; f__Peptostreptococcaceae; g__; s__	0.022 ± 0.018	0 ± 0	0.020979	2.063 (0.023)	Autistic
4365130	k__Bacteria; p__Bacteroidetes; c__Bacteroidia; o__Bacteroidales; f__Porphyromonadaceae; g__Parabacteroides; s__distasonis	0.043 ± 0.028	0 ± 0	0.020979	2.324 (0.044)	Autistic
197792	k__Bacteria; p__Firmicutes; c__Clostridia; o__Clostridiales; f__Lachnospiraceae; g__Blautia; s__	0.03 ± 0.011	0.072 ± 0.012	0.023976	2.359 (0.009)	Control
144814	k__Bacteria; p__Proteobacteria; c__Gammaproteobacteria; o__Enterobacteriales; f__Enterobacteriaceae; g__; s__	0.031 ± 0.019	0.001 ± 0.001	0.024975	2.163 (0.045)	Autistic
193968	k__Bacteria; p__Firmicutes; c__Clostridia; o__Clostridiales; f__Ruminococcaceae; g__; s__	0.063 ± 0.025	0.009 ± 0.005	0.025974	2.493 (0.002)	Autistic
178056	k__Bacteria; p__Firmicutes; c__Clostridia; o__Clostridiales; f__Ruminococcaceae; g__Faecalibacterium; s__prausnitzii	0.056 ± 0.039	0.005 ± 0.002	0.027972	2.42 (0.007)	Autistic
72820	k__Bacteria; p__Actinobacteria; c__Actinobacteria; o__Bifidobacteriales; f__Bifidobacteriaceae; g__Bifidobacterium; s__longum	6.904 ± 2.021	15.302 ± 2.943	0.028971	4.62 (0.029)	Control
196482	k__Bacteria; p__Firmicutes; c__Clostridia; o__Clostridiales; f__Ruminococcaceae; g__; s__	0.025 ± 0.009	0.004 ± 0.003	0.033966	2.084 (0.008)	Autistic
182735	k__Bacteria; p__Firmicutes; c__Clostridia; o__Clostridiales; f__; g__; s__	0 ± 0	0.105 ± 0.074	0.033966	2.76 (0.031)	Control
174403	k__Bacteria; p__Firmicutes; c__Clostridia; o__Clostridiales; f__Ruminococcaceae; g__Faecalibacterium; s__prausnitzii	0.001 ± 0	0 ± 0	0.0374807	2.07 (0.042)	Autistic
180473	k__Bacteria; p__Firmicutes; c__Clostridia; o__Clostridiales; f__Ruminococcaceae; g__; s__	0.001 ± 0	0 ± 0	0.0374807	2.046 (0.042)	Autistic
195892	k__Bacteria; p__Firmicutes; c__Clostridia; o__Clostridiales; f__Ruminococcaceae; g__; s__	0.001 ± 0	0 ± 0	0.0374807	2.109 (0.016)	Autistic
310301	k__Bacteria; p__Firmicutes; c__Clostridia; o__Clostridiales; f__Ruminococcaceae; g__Faecalibacterium; s__prausnitzii	0.001 ± 0	0 ± 0	0.0374807	2.067 (0.016)	Autistic
181036	k__Bacteria; p__Firmicutes; c__Clostridia; o__Clostridiales; f__Lachnospiraceae; g__Blautia; s__	0.048 ± 0.017	0.117 ± 0.026	0.038961	2.534 (0.04)	Control
192231	k__Bacteria; p__Firmicutes; c__Clostridia; o__Clostridiales; f__Ruminococcaceae; g__Faecalibacterium; s__prausnitzii	0.332 ± 0.216	0.029 ± 0.014	0.03996	3.191 (0.004)	Autistic
211935	k__Bacteria; p__Firmicutes; c__Clostridia; o__Clostridiales; f__Lachnospiraceae; g__; s__	0.128 ± 0.124	0 ± 0	0.042957	2.81 (0.024)	Autistic
181903	k__Bacteria; p__Firmicutes; c__Clostridia; o__Clostridiales; f__; g__; s__	0.037 ± 0.024	0.001 ± 0.001	0.043956	2.262 (0.034)	Autistic
184037	k__Bacteria; p__Firmicutes; c__Clostridia; o__Clostridiales; f__Lachnospiraceae; g__; s__	0.001 ± 0.001	0.003 ± 0.001	0.043956	2.136 (0.028)	Control
211907	k__Bacteria; p__Firmicutes; c__Clostridia; o__Clostridiales; f__Ruminococcaceae; g__; s__	0.033 ± 0.016	0.006 ± 0.003	x	2.155 (0.007)
319275	k__Bacteria; p__Firmicutes; c__Clostridia; o__Clostridiales; f__Ruminococcaceae; g__Faecalibacterium; s__prausnitzii	0.019 ± 0.013	0.002 ± 0.002	x	2.023 (0.044)
187126	k__Bacteria; p__Firmicutes; c__Clostridia; o__Clostridiales; f__Ruminococcaceae; g__; s__	0.029 ± 0.012	0.007 ± 0.004	x	2.035 (0.038)
176862	k__Bacteria; p__Firmicutes; c__Clostridia; o__Clostridiales; f__; g__; s__	0.001 ± 0	0 ± 0	x	2.121 (0.041)
292216	k__Bacteria; p__Firmicutes; c__Clostridia; o__Clostridiales; f__Lachnospiraceae; g__Dorea; s__	0.001 ± 0	0 ± 0	x	2.126 (0.041)
195714	k__Bacteria; p__Firmicutes; c__Clostridia; o__Clostridiales; f__Lachnospiraceae; g__; s__	0 ± 0	0.001 ± 0	x	2.162 (0.032)
197970	k__Bacteria; p__Firmicutes; c__Clostridia; o__Clostridiales; f__Ruminococcaceae; g__; s__	0.042 ± 0.013	0.015 ± 0.009	x	2.163 (0.023)
813217	k__Bacteria; p__Proteobacteria; c__Gammaproteobacteria; o__Enterobacteriales; f__Enterobacteriaceae; g__Klebsiella; s__	0.006 ± 0.004	0.03 ± 0.03	x	2.165 (0.048)
195887	k__Bacteria; p__Firmicutes; c__Clostridia; o__Clostridiales; f__Ruminococcaceae; g__; s__	0.033 ± 0.021	0.005 ± 0.003	x	2.167 (0.004)
179826	k__Bacteria; p__Firmicutes; c__Clostridia; o__Clostridiales; f__Ruminococcaceae; g__; s__	0.038 ± 0.022	0.005 ± 0.004	x	2.204 (0.037)
195855	k__Bacteria; p__Firmicutes; c__Clostridia; o__Clostridiales; f__Ruminococcaceae; g__Faecalibacterium; s__prausnitzii	0.04 ± 0.019	0.009 ± 0.005	x	2.226 (0.046)
193061	k__Bacteria; p__Firmicutes; c__Clostridia; o__Clostridiales; f__Lachnospiraceae; g__Blautia; s__	0.039 ± 0.033	0.002 ± 0.001	x	2.272 (0.044)
185411	k__Bacteria; p__Firmicutes; c__Clostridia; o__Clostridiales; f__Lachnospiraceae; g__Roseburia; s__	0.044 ± 0.024	0.003 ± 0.002	x	2.325 (0.018)
186022	k__Bacteria; p__Firmicutes; c__Clostridia; o__Clostridiales; f__Lachnospiraceae; g__Blautia; s__	0.028 ± 0.022	0.062 ± 0.043	x	2.421 (0.039)
2235671	k__Bacteria; p__Firmicutes; c__Clostridia; o__Clostridiales; f__Lachnospiraceae; g__Blautia; s__producta	0.018 ± 0.013	0.072 ± 0.038	x	2.431 (0.044)
2901965	k__Bacteria; p__Firmicutes; c__Bacilli; o__Lactobacillales; f__Streptococcaceae; g__Streptococcus; s__	0.103 ± 0.08	0.191 ± 0.047	x	2.673 (0.017)
4463532	k__Bacteria; p__Firmicutes; c__Clostridia; o__Clostridiales; f__; g__; s__	0.136 ± 0.121	0.005 ± 0.003	x	2.818 (0.005)
183780	k__Bacteria; p__Firmicutes; c__Clostridia; o__Clostridiales; f__Ruminococcaceae; g__Faecalibacterium; s__prausnitzii	0.183 ± 0.099	0.036 ± 0.019	x	2.88 (0.031)
1100972	k__Bacteria; p__Firmicutes; c__Bacilli; o__Lactobacillales; f__Streptococcaceae; g__Lactococcus; s__	0.013 ± 0.011	0.202 ± 0.114	x	2.94 (0.048)
2383341	k__Bacteria; p__Bacteroidetes; c__Bacteroidia; o__Bacteroidales; f__Bacteroidaceae; g__Bacteroides; s__uniformis	0.214 ± 0.116	0.016 ± 0.012	x	2.994 (0.021)
328617	k__Bacteria; p__Bacteroidetes; c__Bacteroidia; o__Bacteroidales; f__Bacteroidaceae; g__Bacteroides; s__uniformis	0.238 ± 0.14	0.021 ± 0.016	x	3.031 (0.034)
4364222	k__Bacteria; p__Firmicutes; c__Clostridia; o__Clostridiales; f__Clostridiaceae; g__; s__	0.048 ± 0.034	0.295 ± 0.168	x	3.045 (0.049)
4381430	k__Bacteria; p__Firmicutes; c__Clostridia; o__Clostridiales; f__Ruminococcaceae; g__Faecalibacterium; s__prausnitzii	0.473 ± 0.233	0.147 ± 0.067	x	3.224 (0.025)
4418832	k__Bacteria; p__Firmicutes; c__Clostridia; o__Clostridiales; f__Clostridiaceae; g__; s__	0.053 ± 0.031	0.462 ± 0.254	x	3.267 (0.03)
4358921	k__Bacteria; p__Firmicutes; c__Clostridia; o__Clostridiales; f__; g__; s__	0.484 ± 0.385	0.054 ± 0.032	x	3.34 (0.013)
4405324	k__Bacteria; p__Firmicutes; c__Clostridia; o__Clostridiales; f__Clostridiaceae; g__; s__	0.094 ± 0.059	0.795 ± 0.453	x	3.497 (0.022)
192462	k__Bacteria; p__Firmicutes; c__Clostridia; o__Clostridiales; f__; g__; s__	2.029 ± 1.86	0.08 ± 0.056	x	3.989 (0.012)
4398028	k__Bacteria; p__Firmicutes; c__Clostridia; o__Clostridiales; f__Ruminococcaceae; g__; s__	0.676 ± 0.676	3.367 ± 1.655	x	4.117 (0.006)
265871	k__Bacteria; p__Firmicutes; c__Clostridia; o__Clostridiales; f__Ruminococcaceae; g__; s__	3.82 ± 2.091	0.894 ± 0.419	x	4.174 (0.029)
294210	k__Bacteria; p__Actinobacteria; c__Coriobacteriia; o__Coriobacteriales; f__Coriobacteriaceae; g__Collinsella; s__stercoris	0.003 ± 0.001	3.361 ± 3.361	x	4.239 (0.048)
159911	k__Bacteria; p__Firmicutes; c__Clostridia; o__Clostridiales; f__Lachnospiraceae; g__Coprococcus; s__	0.002 ± 0.002	0 ± 0	0.00027196	x
177623	k__Bacteria; p__Firmicutes; c__Clostridia; o__Clostridiales; f__Ruminococcaceae; g__Ruminococcus; s__	0.002 ± 0.002	0 ± 0	0.00027196	x
178885	k__Bacteria; p__Proteobacteria; c__Betaproteobacteria; o__Burkholderiales; f__Alcaligenaceae; g__Sutterella; s__	0.002 ± 0.002	0 ± 0	0.00027196	x
182118	k__Bacteria; p__Firmicutes; c__Clostridia; o__Clostridiales; f__Lachnospiraceae; g__Coprococcus; s__	0.002 ± 0.002	0 ± 0	0.00027196	x
185814	k__Bacteria; p__Firmicutes; c__Clostridia; o__Clostridiales; f__Ruminococcaceae; g__; s__	0.002 ± 0.002	0 ± 0	0.00027196	x
194693	k__Bacteria; p__Firmicutes; c__Clostridia; o__Clostridiales; f__Lachnospiraceae; g__Coprococcus; s__	0.002 ± 0.002	0 ± 0	0.00027196	x
195522	k__Bacteria; p__Firmicutes; c__Clostridia; o__Clostridiales; f__Lachnospiraceae; g__Blautia; s__	0.002 ± 0.002	0 ± 0	0.00027196	x
272886	k__Bacteria; p__Firmicutes; c__Clostridia; o__Clostridiales; f__; g__; s__	0.002 ± 0.001	0 ± 0	0.00027196	x
361556	k__Bacteria; p__Firmicutes; c__Clostridia; o__Clostridiales; f__Lachnospiraceae; g__; s__	0.002 ± 0.001	0 ± 0	0.00027196	x
450047	k__Bacteria; p__Firmicutes; c__Clostridia; o__Clostridiales; f__Lachnospiraceae; g__; s__	0.002 ± 0.002	0 ± 0	0.00027196	x
816702	k__Bacteria; p__Proteobacteria; c__Gammaproteobacteria; o__Enterobacteriales; f__Enterobacteriaceae; g__; s__	0.002 ± 0.002	0 ± 0	0.00027196	x
846127	k__Bacteria; p__Bacteroidetes; c__Bacteroidia; o__Bacteroidales; f__Porphyromonadaceae; g__Parabacteroides; s__	0.002 ± 0.002	0 ± 0	0.00027196	x
2634854	k__Bacteria; p__Bacteroidetes; c__Bacteroidia; o__Bacteroidales; f__Porphyromonadaceae; g__Dysgonomonas; s__	0.002 ± 0.002	0 ± 0	0.00027196	x
4294655	k__Bacteria; p__Proteobacteria; c__Gammaproteobacteria; o__Pasteurellales; f__Pasteurellaceae; g__Aggregatibacter; s__segnis	0.002 ± 0.002	0 ± 0	0.00027196	x
4395774	k__Bacteria; p__Bacteroidetes; c__Bacteroidia; o__Bacteroidales; f__Bacteroidaceae; g__Bacteroides; s__	0.002 ± 0.002	0 ± 0	0.00027196	x
110562	k__Bacteria; p__Firmicutes; c__Clostridia; o__Clostridiales; f__Ruminococcaceae; g__Ruminococcus; s__	0.002 ± 0.002	0 ± 0	0.000618097	x
175761	k__Bacteria; p__Firmicutes; c__Clostridia; o__Clostridiales; f__Ruminococcaceae; g__; s__	0.002 ± 0.002	0 ± 0	0.000618097	x
195029	k__Bacteria; p__Firmicutes; c__Clostridia; o__Clostridiales; f__; g__; s__	0.002 ± 0.002	0 ± 0	0.000618097	x
199716	k__Bacteria; p__Bacteroidetes; c__Bacteroidia; o__Bacteroidales; f__Bacteroidaceae; g__Bacteroides; s__	0.002 ± 0.001	0 ± 0	0.000618097	x
208927	k__Bacteria; p__Firmicutes; c__Clostridia; o__Clostridiales; f__Ruminococcaceae; g__; s__	0.002 ± 0.002	0 ± 0	0.000618097	x
324015	k__Bacteria; p__Firmicutes; c__Clostridia; o__Clostridiales; f__; g__; s__	0.002 ± 0.002	0 ± 0	0.000618097	x
363477	k__Bacteria; p__Firmicutes; c__Clostridia; o__Clostridiales; f__Ruminococcaceae; g__; s__	0.002 ± 0.001	0 ± 0	0.000618097	x
1679707	k__Bacteria; p__Firmicutes; c__Clostridia; o__Clostridiales; f__Ruminococcaceae; g__; s__	0.002 ± 0.001	0 ± 0	0.000618097	x
1914875	k__Bacteria; p__Firmicutes; c__Clostridia; o__Clostridiales; f__Lachnospiraceae; g__; s__	0.002 ± 0.001	0 ± 0	0.000618097	x
3272632	k__Bacteria; p__Bacteroidetes; c__Bacteroidia; o__Bacteroidales; f__Bacteroidaceae; g__Bacteroides; s__	0.002 ± 0.002	0 ± 0	0.000618097	x
4369327	k__Bacteria; p__Bacteroidetes; c__Bacteroidia; o__Bacteroidales; f__Bacteroidaceae; g__Bacteroides; s__	0.002 ± 0.001	0 ± 0	0.000618097	x
4376964	k__Bacteria; p__Bacteroidetes; c__Bacteroidia; o__Bacteroidales; f__Bacteroidaceae; g__Bacteroides; s__uniformis	0.002 ± 0.001	0 ± 0	0.000618097	x
4408423	k__Bacteria; p__Firmicutes; c__Clostridia; o__Clostridiales; f__Lachnospiraceae; g__; s__	0.002 ± 0.001	0 ± 0	0.000618097	x
4460786	k__Bacteria; p__Firmicutes; c__Clostridia; o__Clostridiales; f__Lachnospiraceae; g__[Ruminococcus]; s__	0.002 ± 0.002	0 ± 0	0.000618097	x
4466150	k__Bacteria; p__Proteobacteria; c__Gammaproteobacteria; o__Pasteurellales; f__Pasteurellaceae; g__Aggregatibacter; s__segnis	0.002 ± 0.002	0 ± 0	0.000618097	x
177032	k__Bacteria; p__Firmicutes; c__Clostridia; o__Clostridiales; f__; g__; s__	0 ± 0	0.002 ± 0.002	0.000939087	x
305477	k__Bacteria; p__Firmicutes; c__Clostridia; o__Clostridiales; f__; g__; s__	0 ± 0	0.002 ± 0.002	0.000939087	x
708285	k__Bacteria; p__Firmicutes; c__Clostridia; o__Clostridiales; f__Clostridiaceae; g__; s__	0 ± 0	0.002 ± 0.001	0.000939087	x
4426298	k__Bacteria; p__Actinobacteria; c__Actinobacteria; o__Bifidobacteriales; f__Bifidobacteriaceae; g__Bifidobacterium; s__animalis	0 ± 0	0.002 ± 0.002	0.000939087	x
113003	k__Bacteria; p__Firmicutes; c__Clostridia; o__Clostridiales; f__Ruminococcaceae; g__Ruminococcus; s__	0.002 ± 0.001	0 ± 0	0.000999001	x
113417	k__Bacteria; p__Proteobacteria; c__Deltaproteobacteria; o__Desulfovibrionales; f__Desulfovibrionaceae; g__; s__	0.015 ± 0.015	0 ± 0	0.000999001	x
124906	k__Bacteria; p__Firmicutes; c__Clostridia; o__Clostridiales; f__Veillonellaceae; g__Megasphaera; s__	0.012 ± 0.012	0 ± 0	0.000999001	x
127309	k__Bacteria; p__Bacteroidetes; c__Bacteroidia; o__Bacteroidales; f__Bacteroidaceae; g__Bacteroides; s__	0.015 ± 0.015	0 ± 0	0.000999001	x
146564	k__Bacteria; p__Firmicutes; c__Clostridia; o__Clostridiales; f__; g__; s__	0.006 ± 0.005	0 ± 0	0.000999001	x
157327	k__Bacteria; p__Bacteroidetes; c__Bacteroidia; o__Bacteroidales; f__Bacteroidaceae; g__Bacteroides; s__	0.002 ± 0.002	0 ± 0	0.000999001	x
158217	k__Bacteria; p__Firmicutes; c__Clostridia; o__Clostridiales; f__; g__; s__	0.137 ± 0.137	0 ± 0	0.000999001	x
165257	k__Bacteria; p__Firmicutes; c__Clostridia; o__Clostridiales; f__Ruminococcaceae; g__; s__	0.006 ± 0.006	0 ± 0	0.000999001	x
173565	k__Bacteria; p__Bacteroidetes; c__Bacteroidia; o__Bacteroidales; f__Prevotellaceae; g__Prevotella; s__copri	0.011 ± 0.011	0 ± 0	0.000999001	x
173654	k__Bacteria; p__Proteobacteria; c__Gammaproteobacteria; o__Enterobacteriales; f__Enterobacteriaceae; g__; s__	0.005 ± 0.003	0 ± 0	0.000999001	x
174611	k__Bacteria; p__Firmicutes; c__Clostridia; o__Clostridiales; f__Ruminococcaceae; g__Faecalibacterium; s__prausnitzii	0.004 ± 0.003	0 ± 0	0.000999001	x
174831	k__Bacteria; p__Bacteroidetes; c__Bacteroidia; o__Bacteroidales; f__Prevotellaceae; g__Prevotella; s__copri	0.02 ± 0.015	0 ± 0	0.000999001	x
176167	k__Bacteria; p__Firmicutes; c__Clostridia; o__Clostridiales; f__Ruminococcaceae; g__Ruminococcus; s__	0.043 ± 0.043	0 ± 0	0.000999001	x
176468	k__Bacteria; p__Proteobacteria; c__Gammaproteobacteria; o__Enterobacteriales; f__Enterobacteriaceae; g__Enterobacter; s__cowanii	0.003 ± 0.003	0 ± 0	0.000999001	x
177518	k__Bacteria; p__Firmicutes; c__Clostridia; o__Clostridiales; f__Lachnospiraceae; g__Coprococcus; s__	0.008 ± 0.008	0 ± 0	0.000999001	x
177679	k__Bacteria; p__Bacteroidetes; c__Bacteroidia; o__Bacteroidales; f__S24-7; g__; s__	0.178 ± 0.178	0 ± 0	0.000999001	x
177913	k__Bacteria; p__Firmicutes; c__Clostridia; o__Clostridiales; f__Ruminococcaceae; g__; s__	0.002 ± 0.002	0 ± 0	0.000999001	x
178253	k__Bacteria; p__Bacteroidetes; c__Bacteroidia; o__Bacteroidales; f__Bacteroidaceae; g__Bacteroides; s__	0.024 ± 0.024	0 ± 0	0.000999001	x
178331	k__Bacteria; p__Verrucomicrobia; c__Verrucomicrobiae; o__Verrucomicrobiales; f__Verrucomicrobiaceae; g__Akkermansia; s__muciniphila	0.003 ± 0.003	0 ± 0	0.000999001	x
180307	k__Bacteria; p__Firmicutes; c__Clostridia; o__Clostridiales; f__; g__; s__	0.002 ± 0.002	0 ± 0	0.000999001	x
181422	k__Bacteria; p__Firmicutes; c__Clostridia; o__Clostridiales; f__Ruminococcaceae; g__Faecalibacterium; s__prausnitzii	0.002 ± 0.001	0 ± 0	0.000999001	x
182255	k__Bacteria; p__Bacteroidetes; c__Bacteroidia; o__Bacteroidales; f__Bacteroidaceae; g__Bacteroides; s__	0.004 ± 0.002	0 ± 0	0.000999001	x
183817	k__Bacteria; p__Bacteroidetes; c__Bacteroidia; o__Bacteroidales; f__Bacteroidaceae; g__Bacteroides; s__	0.003 ± 0.003	0 ± 0	0.000999001	x
184174	k__Bacteria; p__Bacteroidetes; c__Bacteroidia; o__Bacteroidales; f__Bacteroidaceae; g__Bacteroides; s__	0.003 ± 0.002	0 ± 0	0.000999001	x
184209	k__Bacteria; p__Bacteroidetes; c__Bacteroidia; o__Bacteroidales; f__Bacteroidaceae; g__Bacteroides; s__	0.03 ± 0.029	0 ± 0	0.000999001	x
184897	k__Bacteria; p__Firmicutes; c__Clostridia; o__Clostridiales; f__Ruminococcaceae; g__Faecalibacterium; s__prausnitzii	0.01 ± 0.002	0 ± 0	0.000999001	x
185821	k__Bacteria; p__Firmicutes; c__Clostridia; o__Clostridiales; f__Lachnospiraceae; g__Coprococcus; s__eutactus	0 ± 0	0.008 ± 0.008	0.000999001	x
186352	k__Bacteria; p__Bacteroidetes; c__Bacteroidia; o__Bacteroidales; f__Bacteroidaceae; g__Bacteroides; s__	0.008 ± 0.006	0 ± 0	0.000999001	x
186358	k__Bacteria; p__Bacteroidetes; c__Bacteroidia; o__Bacteroidales; f__Bacteroidaceae; g__Bacteroides; s__	0.003 ± 0.003	0 ± 0	0.000999001	x
186478	k__Bacteria; p__Firmicutes; c__Clostridia; o__Clostridiales; f__Ruminococcaceae; g__; s__	0.012 ± 0.005	0 ± 0	0.000999001	x
186851	k__Bacteria; p__Firmicutes; c__Clostridia; o__Clostridiales; f__; g__; s__	0.006 ± 0.006	0 ± 0	0.000999001	x
186866	k__Bacteria; p__Bacteroidetes; c__Bacteroidia; o__Bacteroidales; f__Bacteroidaceae; g__Bacteroides; s__	0.005 ± 0.003	0 ± 0	0.000999001	x
186981	k__Bacteria; p__Bacteroidetes; c__Bacteroidia; o__Bacteroidales; f__[Barnesiellaceae]; g__; s__	0.008 ± 0.008	0 ± 0	0.000999001	x
187651	k__Bacteria; p__Firmicutes; c__Clostridia; o__Clostridiales; f__Lachnospiraceae; g__[Ruminococcus]; s__gnavus	0.005 ± 0.003	0 ± 0	0.000999001	x
188454	k__Bacteria; p__Firmicutes; c__Clostridia; o__Clostridiales; f__Ruminococcaceae; g__; s__	0.015 ± 0.005	0.001 ± 0	0.000999001	x
188851	k__Bacteria; p__Bacteroidetes; c__Bacteroidia; o__Bacteroidales; f__S24-7; g__; s__	0.108 ± 0.082	0 ± 0	0.000999001	x
188974	k__Bacteria; p__Firmicutes; c__Clostridia; o__Clostridiales; f__Lachnospiraceae; g__Coprococcus; s__	0.003 ± 0.003	0 ± 0	0.000999001	x
189684	k__Bacteria; p__Firmicutes; c__Clostridia; o__Clostridiales; f__Ruminococcaceae; g__; s__	0.004 ± 0.002	0 ± 0	0.000999001	x
190815	k__Bacteria; p__Bacteroidetes; c__Bacteroidia; o__Bacteroidales; f__Bacteroidaceae; g__Bacteroides; s__	0.004 ± 0.003	0 ± 0	0.000999001	x
191180	k__Bacteria; p__Firmicutes; c__Clostridia; o__Clostridiales; f__Ruminococcaceae; g__; s__	0.002 ± 0.001	0 ± 0	0.000999001	x
191256	k__Bacteria; p__Firmicutes; c__Clostridia; o__Clostridiales; f__Lachnospiraceae; g__; s__	0.005 ± 0.004	0 ± 0	0.000999001	x
191278	k__Bacteria; p__Firmicutes; c__Clostridia; o__Clostridiales; f__Ruminococcaceae; g__; s__	0.007 ± 0.007	0 ± 0	0.000999001	x
191483	k__Bacteria; p__Bacteroidetes; c__Bacteroidia; o__Bacteroidales; f__Bacteroidaceae; g__Bacteroides; s__	0.017 ± 0.016	0 ± 0	0.000999001	x
193191	k__Bacteria; p__Firmicutes; c__Clostridia; o__Clostridiales; f__Lachnospiraceae; g__Lachnospira; s__	0.003 ± 0.002	0 ± 0	0.000999001	x
193372	k__Bacteria; p__Firmicutes; c__Clostridia; o__Clostridiales; f__Lachnospiraceae; g__Blautia; s__	0.002 ± 0.002	0 ± 0	0.000999001	x
193601	k__Bacteria; p__Firmicutes; c__Clostridia; o__Clostridiales; f__Lachnospiraceae; g__; s__	0.002 ± 0.002	0 ± 0	0.000999001	x
194360	k__Bacteria; p__Proteobacteria; c__Betaproteobacteria; o__Burkholderiales; f__Alcaligenaceae; g__Sutterella; s__	0.004 ± 0.004	0 ± 0	0.000999001	x
194654	k__Bacteria; p__Firmicutes; c__Clostridia; o__Clostridiales; f__Ruminococcaceae; g__; s__	0.015 ± 0.009	0.001 ± 0	0.000999001	x
195508	k__Bacteria; p__Bacteroidetes; c__Bacteroidia; o__Bacteroidales; f__Bacteroidaceae; g__Bacteroides; s__caccae	0.018 ± 0.01	0 ± 0	0.000999001	x
196134	k__Bacteria; p__Firmicutes; c__Clostridia; o__Clostridiales; f__; g__; s__	0.003 ± 0.002	0 ± 0	0.000999001	x
197341	k__Bacteria; p__Firmicutes; c__Clostridia; o__Clostridiales; f__Lachnospiraceae; g__Lachnospira; s__	0.007 ± 0.007	0 ± 0	0.000999001	x
197708	k__Bacteria; p__Firmicutes; c__Clostridia; o__Clostridiales; f__Ruminococcaceae; g__Faecalibacterium; s__prausnitzii	0.007 ± 0.003	0 ± 0	0.000999001	x
197761	k__Bacteria; p__Firmicutes; c__Clostridia; o__Clostridiales; f__Ruminococcaceae; g__; s__	0.002 ± 0.001	0 ± 0	0.000999001	x
198786	k__Bacteria; p__Bacteroidetes; c__Bacteroidia; o__Bacteroidales; f__Prevotellaceae; g__Prevotella; s__copri	0.002 ± 0.002	0 ± 0	0.000999001	x
199354	k__Bacteria; p__Bacteroidetes; c__Bacteroidia; o__Bacteroidales; f__[Barnesiellaceae]; g__; s__	0.003 ± 0.002	0 ± 0	0.000999001	x
208479	k__Bacteria; p__Bacteroidetes; c__Bacteroidia; o__Bacteroidales; f__[Odoribacteraceae]; g__Butyricimonas; s__	0.021 ± 0.021	0 ± 0	0.000999001	x
211720	k__Bacteria; p__Proteobacteria; c__Alphaproteobacteria; o__RF32; f__; g__; s__	0.09 ± 0.09	0 ± 0	0.000999001	x
213566	k__Bacteria; p__Bacteroidetes; c__Bacteroidia; o__Bacteroidales; f__Bacteroidaceae; g__Bacteroides; s__	0.021 ± 0.021	0 ± 0	0.000999001	x
214031	k__Bacteria; p__Bacteroidetes; c__Bacteroidia; o__Bacteroidales; f__Rikenellaceae; g__; s__	0.005 ± 0.005	0 ± 0	0.000999001	x
219439	k__Bacteria; p__Proteobacteria; c__Gammaproteobacteria; o__Xanthomonadales; f__Xanthomonadaceae; g__; s__	0 ± 0	0.004 ± 0.004	0.000999001	x
221429	k__Bacteria; p__Firmicutes; c__Clostridia; o__Clostridiales; f__Ruminococcaceae; g__; s__	0.004 ± 0.002	0 ± 0	0.000999001	x
222842	k__Bacteria; p__Firmicutes; c__Clostridia; o__Clostridiales; f__Veillonellaceae; g__Megamonas; s__	0.002 ± 0.002	0 ± 0	0.000999001	x
227819	k__Bacteria; p__Actinobacteria; c__Coriobacteriia; o__Coriobacteriales; f__Coriobacteriaceae; g__; s__	0 ± 0	0.005 ± 0.005	0.000999001	x
266274	k__Bacteria; p__Firmicutes; c__Clostridia; o__Clostridiales; f__Ruminococcaceae; g__; s__	0.022 ± 0.022	0 ± 0	0.000999001	x
275061	k__Bacteria; p__Firmicutes; c__Clostridia; o__Clostridiales; f__Ruminococcaceae; g__; s__	0.003 ± 0.003	0 ± 0	0.000999001	x
287514	k__Bacteria; p__Actinobacteria; c__Coriobacteriia; o__Coriobacteriales; f__Coriobacteriaceae; g__Collinsella; s__aerofaciens	0.001 ± 0	0.008 ± 0.002	0.000999001	x
288810	k__Bacteria; p__Firmicutes; c__Clostridia; o__Clostridiales; f__Ruminococcaceae; g__; s__	0.003 ± 0.002	0 ± 0	0.000999001	x
288930	k__Bacteria; p__Firmicutes; c__Clostridia; o__Clostridiales; f__; g__; s__	0.002 ± 0.001	0 ± 0	0.000999001	x
289867	k__Bacteria; p__Firmicutes; c__Clostridia; o__Clostridiales; f__; g__; s__	0 ± 0	0.003 ± 0.003	0.000999001	x
291811	k__Bacteria; p__Actinobacteria; c__Coriobacteriia; o__Coriobacteriales; f__Coriobacteriaceae; g__Collinsella; s__stercoris	0 ± 0	0.015 ± 0.015	0.000999001	x
292242	k__Bacteria; p__Firmicutes; c__Clostridia; o__Clostridiales; f__Ruminococcaceae; g__; s__	0.014 ± 0.014	0 ± 0	0.000999001	x
292489	k__Bacteria; p__Firmicutes; c__Clostridia; o__Clostridiales; f__Clostridiaceae; g__; s__	0 ± 0	0.004 ± 0.004	0.000999001	x
294270	k__Bacteria; p__Bacteroidetes; c__Bacteroidia; o__Bacteroidales; f__Prevotellaceae; g__Prevotella; s__copri	0.005 ± 0.005	0 ± 0	0.000999001	x
294969	k__Bacteria; p__Firmicutes; c__Clostridia; o__Clostridiales; f__Clostridiaceae; g__Sarcina; s__	0 ± 0	0.004 ± 0.004	0.000999001	x
298896	k__Bacteria; p__Firmicutes; c__Clostridia; o__Clostridiales; f__Lachnospiraceae; g__Blautia; s__	0.004 ± 0.003	0 ± 0	0.000999001	x
299187	k__Bacteria; p__Firmicutes; c__Clostridia; o__Clostridiales; f__Lachnospiraceae; g__; s__	0.003 ± 0.001	0 ± 0	0.000999001	x
300235	k__Bacteria; p__Firmicutes; c__Clostridia; o__Clostridiales; f__Lachnospiraceae; g__Roseburia; s__	0.004 ± 0.004	0 ± 0	0.000999001	x
301253	k__Bacteria; p__Bacteroidetes; c__Bacteroidia; o__Bacteroidales; f__Prevotellaceae; g__Prevotella; s__copri	0.029 ± 0.029	0 ± 0	0.000999001	x
305141	k__Bacteria; p__Actinobacteria; c__Coriobacteriia; o__Coriobacteriales; f__Coriobacteriaceae; g__; s__	0 ± 0	0.002 ± 0.002	0.000999001	x
305561	k__Bacteria; p__Firmicutes; c__Bacilli; o__Lactobacillales; f__Enterococcaceae; g__Enterococcus; s__	0 ± 0	0.013 ± 0.011	0.000999001	x
308860	k__Bacteria; p__Firmicutes; c__Clostridia; o__Clostridiales; f__Ruminococcaceae; g__; s__	0.003 ± 0.001	0 ± 0	0.000999001	x
309107	k__Bacteria; p__Firmicutes; c__Clostridia; o__Clostridiales; f__Clostridiaceae; g__Clostridium; s__hiranonis	0 ± 0	0.003 ± 0.003	0.000999001	x
310028	k__Bacteria; p__Actinobacteria; c__Coriobacteriia; o__Coriobacteriales; f__Coriobacteriaceae; g__; s__	0 ± 0	0.007 ± 0.007	0.000999001	x
315391	k__Bacteria; p__Firmicutes; c__Clostridia; o__Clostridiales; f__Ruminococcaceae; g__Faecalibacterium; s__prausnitzii	0.005 ± 0.002	0 ± 0	0.000999001	x
321560	k__Bacteria; p__Firmicutes; c__Clostridia; o__Clostridiales; f__; g__; s__	0 ± 0	0.004 ± 0.004	0.000999001	x
325213	k__Bacteria; p__Firmicutes; c__Clostridia; o__Clostridiales; f__; g__; s__	0 ± 0	0.003 ± 0.003	0.000999001	x
325850	k__Bacteria; p__Proteobacteria; c__Alphaproteobacteria; o__RF32; f__; g__; s__	0 ± 0	0.009 ± 0.009	0.000999001	x
334215	k__Bacteria; p__Firmicutes; c__Clostridia; o__Clostridiales; f__Ruminococcaceae; g__Oscillospira; s__	0.012 ± 0.012	0 ± 0	0.000999001	x
336761	k__Bacteria; p__Firmicutes; c__Clostridia; o__Clostridiales; f__Lachnospiraceae; g__Blautia; s__	0.004 ± 0.004	0 ± 0	0.000999001	x
339494	k__Bacteria; p__Firmicutes; c__Clostridia; o__Clostridiales; f__Ruminococcaceae; g__Faecalibacterium; s__prausnitzii	0.009 ± 0.009	0 ± 0	0.000999001	x
346938	k__Bacteria; p__Bacteroidetes; c__Bacteroidia; o__Bacteroidales; f__Prevotellaceae; g__Prevotella; s__copri	0.007 ± 0.007	0 ± 0	0.000999001	x
349809	k__Bacteria; p__Bacteroidetes; c__Bacteroidia; o__Bacteroidales; f__Bacteroidaceae; g__Bacteroides; s__	0.004 ± 0.002	0 ± 0	0.000999001	x
354850	k__Bacteria; p__Bacteroidetes; c__Bacteroidia; o__Bacteroidales; f__Bacteroidaceae; g__Bacteroides; s__	0.003 ± 0.002	0 ± 0	0.000999001	x
358939	k__Bacteria; p__Firmicutes; c__Clostridia; o__Clostridiales; f__Lachnospiraceae; g__; s__	0.002 ± 0.002	0 ± 0	0.000999001	x
363321	k__Bacteria; p__Firmicutes; c__Clostridia; o__Clostridiales; f__Lachnospiraceae; g__Dorea; s__	0.003 ± 0.002	0 ± 0	0.000999001	x
363997	k__Bacteria; p__Firmicutes; c__Clostridia; o__Clostridiales; f__Ruminococcaceae; g__; s__	0.003 ± 0.003	0 ± 0	0.000999001	x
367433	k__Bacteria; p__Firmicutes; c__Clostridia; o__Clostridiales; f__Ruminococcaceae; g__Faecalibacterium; s__prausnitzii	0.004 ± 0.001	0 ± 0	0.000999001	x
369429	k__Bacteria; p__Firmicutes; c__Clostridia; o__Clostridiales; f__; g__; s__	0 ± 0	0.02 ± 0.015	0.000999001	x
513445	k__Bacteria; p__Bacteroidetes; c__Bacteroidia; o__Bacteroidales; f__Bacteroidaceae; g__Bacteroides; s__	0.006 ± 0.005	0 ± 0	0.000999001	x
524848	k__Bacteria; p__Firmicutes; c__Clostridia; o__Clostridiales; f__Ruminococcaceae; g__; s__	0.003 ± 0.001	0 ± 0	0.000999001	x
538322	k__Bacteria; p__Firmicutes; c__Clostridia; o__Clostridiales; f__Ruminococcaceae; g__; s__	0.002 ± 0.001	0 ± 0	0.000999001	x
550814	k__Bacteria; p__Bacteroidetes; c__Bacteroidia; o__Bacteroidales; f__Bacteroidaceae; g__Bacteroides; s__	0.005 ± 0.003	0 ± 0	0.000999001	x
581921	k__Bacteria; p__Proteobacteria; c__Betaproteobacteria; o__Burkholderiales; f__Comamonadaceae; g__Comamonas; s__	0 ± 0	0.004 ± 0.004	0.000999001	x
582921	k__Bacteria; p__Proteobacteria; c__Alphaproteobacteria; o__Sphingomonadales; f__Sphingomonadaceae; g__Sphingomonas; s__	0 ± 0	0.002 ± 0.002	0.000999001	x
583117	k__Bacteria; p__Bacteroidetes; c__Bacteroidia; o__Bacteroidales; f__Bacteroidaceae; g__Bacteroides; s__	0.007 ± 0.005	0 ± 0	0.000999001	x
636296	k__Bacteria; p__Proteobacteria; c__Betaproteobacteria; o__Burkholderiales; f__Alcaligenaceae; g__Sutterella; s__	0.002 ± 0.002	0 ± 0	0.000999001	x
815898	k__Bacteria; p__Proteobacteria; c__Gammaproteobacteria; o__Enterobacteriales; f__Enterobacteriaceae; g__; s__	0.011 ± 0.011	0 ± 0	0.000999001	x
865469	k__Bacteria; p__Proteobacteria; c__Gammaproteobacteria; o__Pasteurellales; f__Pasteurellaceae; g__Haemophilus; s__parainfluenzae	0.013 ± 0.013	0 ± 0	0.000999001	x
901834	k__Bacteria; p__Tenericutes; c__Mollicutes; o__RF39; f__; g__; s__	0 ± 0	0.005 ± 0.005	0.000999001	x
976470	k__Bacteria; p__Firmicutes; c__Clostridia; o__Clostridiales; f__; g__; s__	0 ± 0	0.003 ± 0.003	0.000999001	x
1076818	k__Bacteria; p__Firmicutes; c__Clostridia; o__Clostridiales; f__Lachnospiraceae; g__; s__	0.002 ± 0.002	0 ± 0	0.000999001	x
1736067	k__Bacteria; p__Bacteroidetes; c__Bacteroidia; o__Bacteroidales; f__Bacteroidaceae; g__Bacteroides; s__uniformis	0.003 ± 0.002	0 ± 0	0.000999001	x
1908049	k__Bacteria; p__Firmicutes; c__Clostridia; o__Clostridiales; f__Ruminococcaceae; g__; s__	0.009 ± 0.009	0 ± 0	0.000999001	x
1919007	k__Bacteria; p__Bacteroidetes; c__Bacteroidia; o__Bacteroidales; f__Bacteroidaceae; g__Bacteroides; s__	0.003 ± 0.002	0 ± 0	0.000999001	x
2128805	k__Bacteria; p__Bacteroidetes; c__Bacteroidia; o__Bacteroidales; f__Bacteroidaceae; g__Bacteroides; s__	0.006 ± 0.006	0 ± 0	0.000999001	x
2200896	k__Bacteria; p__Bacteroidetes; c__Bacteroidia; o__Bacteroidales; f__Bacteroidaceae; g__Bacteroides; s__fragilis	0.002 ± 0.002	0 ± 0	0.000999001	x
2280817	k__Bacteria; p__Bacteroidetes; c__Bacteroidia; o__Bacteroidales; f__Prevotellaceae; g__Prevotella; s__copri	0.011 ± 0.01	0 ± 0	0.000999001	x
2386814	k__Bacteria; p__Firmicutes; c__Clostridia; o__Clostridiales; f__; g__; s__	0.014 ± 0.006	0 ± 0	0.000999001	x
2442708	k__Bacteria; p__Bacteroidetes; c__Bacteroidia; o__Bacteroidales; f__Bacteroidaceae; g__Bacteroides; s__	0.03 ± 0.03	0 ± 0	0.000999001	x
2530636	k__Bacteria; p__Firmicutes; c__Clostridia; o__Clostridiales; f__Veillonellaceae; g__Megamonas; s__	0.015 ± 0.015	0 ± 0	0.000999001	x
2544615	k__Bacteria; p__Firmicutes; c__Clostridia; o__Clostridiales; f__Ruminococcaceae; g__Faecalibacterium; s__prausnitzii	0.007 ± 0.007	0 ± 0	0.000999001	x
2647328	k__Bacteria; p__Proteobacteria; c__Gammaproteobacteria; o__Pasteurellales; f__Pasteurellaceae; g__Actinobacillus; s__	0.003 ± 0.002	0 ± 0	0.000999001	x
2658061	k__Bacteria; p__Bacteroidetes; c__Bacteroidia; o__Bacteroidales; f__Bacteroidaceae; g__Bacteroides; s__	0.007 ± 0.007	0 ± 0	0.000999001	x
2957436	k__Bacteria; p__Firmicutes; c__Clostridia; o__Clostridiales; f__Lachnospiraceae; g__Dorea; s__	0.002 ± 0.001	0 ± 0	0.000999001	x
2990918	k__Bacteria; p__Actinobacteria; c__Coriobacteriia; o__Coriobacteriales; f__Coriobacteriaceae; g__Collinsella; s__stercoris	0 ± 0	0.011 ± 0.011	0.000999001	x
3117556	k__Bacteria; p__Bacteroidetes; c__Bacteroidia; o__Bacteroidales; f__[Odoribacteraceae]; g__Butyricimonas; s__	0.06 ± 0.06	0 ± 0	0.000999001	x
3465320	k__Bacteria; p__Bacteroidetes; c__Bacteroidia; o__Bacteroidales; f__Bacteroidaceae; g__Bacteroides; s__	0.005 ± 0.005	0 ± 0	0.000999001	x
3475269	k__Bacteria; p__Bacteroidetes; c__Bacteroidia; o__Bacteroidales; f__Bacteroidaceae; g__Bacteroides; s__ovatus	0.004 ± 0.003	0 ± 0	0.000999001	x
3929758	k__Bacteria; p__Bacteroidetes; c__Bacteroidia; o__Bacteroidales; f__Bacteroidaceae; g__Bacteroides; s__caccae	0.007 ± 0.004	0 ± 0	0.000999001	x
3943182	k__Bacteria; p__Bacteroidetes; c__Bacteroidia; o__Bacteroidales; f__Bacteroidaceae; g__Bacteroides; s__	0.012 ± 0.009	0 ± 0	0.000999001	x
4212012	k__Bacteria; p__Bacteroidetes; c__Bacteroidia; o__Bacteroidales; f__Bacteroidaceae; g__Bacteroides; s__uniformis	0.009 ± 0.004	0 ± 0	0.000999001	x
4232045	k__Bacteria; p__Bacteroidetes; c__Bacteroidia; o__Bacteroidales; f__Bacteroidaceae; g__Bacteroides; s__	0.017 ± 0.016	0 ± 0	0.000999001	x
4297420	k__Bacteria; p__Firmicutes; c__Clostridia; o__Clostridiales; f__Veillonellaceae; g__Veillonella; s__dispar	0.004 ± 0.004	0 ± 0	0.000999001	x
4329571	k__Bacteria; p__Bacteroidetes; c__Bacteroidia; o__Bacteroidales; f__Porphyromonadaceae; g__Parabacteroides; s__	0.011 ± 0.009	0 ± 0	0.000999001	x
4333897	k__Bacteria; p__Proteobacteria; c__Gammaproteobacteria; o__Enterobacteriales; f__Enterobacteriaceae; g__; s__	0.003 ± 0.002	0 ± 0	0.000999001	x
4335776	k__Bacteria; p__Proteobacteria; c__Gammaproteobacteria; o__Pasteurellales; f__Pasteurellaceae; g__Aggregatibacter; s__	0.006 ± 0.005	0 ± 0	0.000999001	x
4338624	k__Bacteria; p__Proteobacteria; c__Betaproteobacteria; o__Burkholderiales; f__Alcaligenaceae; g__Sutterella; s__	0 ± 0	0.003 ± 0.003	0.000999001	x
4345397	k__Bacteria; p__Proteobacteria; c__Gammaproteobacteria; o__Enterobacteriales; f__Enterobacteriaceae; g__; s__	0.018 ± 0.018	0 ± 0	0.000999001	x
4346677	k__Bacteria; p__Bacteroidetes; c__Bacteroidia; o__Bacteroidales; f__Bacteroidaceae; g__Bacteroides; s__	0.016 ± 0.015	0 ± 0	0.000999001	x
4352747	k__Bacteria; p__Bacteroidetes; c__Bacteroidia; o__Bacteroidales; f__Bacteroidaceae; g__Bacteroides; s__ovatus	0.014 ± 0.01	0 ± 0	0.000999001	x
4354477	k__Bacteria; p__Proteobacteria; c__Gammaproteobacteria; o__Enterobacteriales; f__Enterobacteriaceae; g__; s__	0.013 ± 0.008	0 ± 0	0.000999001	x
4372003	k__Bacteria; p__Bacteroidetes; c__Bacteroidia; o__Bacteroidales; f__Porphyromonadaceae; g__Parabacteroides; s__	0.076 ± 0.071	0 ± 0	0.000999001	x
4383922	k__Bacteria; p__Firmicutes; c__Clostridia; o__Clostridiales; f__Lachnospiraceae; g__; s__	0.002 ± 0.002	0 ± 0	0.000999001	x
4386507	k__Bacteria; p__Bacteroidetes; c__Bacteroidia; o__Bacteroidales; f__Bacteroidaceae; g__Bacteroides; s__fragilis	0.003 ± 0.003	0 ± 0	0.000999001	x
4391625	k__Bacteria; p__Firmicutes; c__Clostridia; o__Clostridiales; f__Veillonellaceae; g__Veillonella; s__parvula	0.008 ± 0.005	0 ± 0	0.000999001	x
4405146	k__Bacteria; p__Firmicutes; c__Clostridia; o__Clostridiales; f__; g__; s__	0 ± 0	0.057 ± 0.057	0.000999001	x
4406393	k__Bacteria; p__Proteobacteria; c__Gammaproteobacteria; o__Pasteurellales; f__Pasteurellaceae; g__Haemophilus; s__influenzae	0.006 ± 0.006	0 ± 0	0.000999001	x
4407515	k__Bacteria; p__Bacteroidetes; c__Bacteroidia; o__Bacteroidales; f__Bacteroidaceae; g__Bacteroides; s__	0.018 ± 0.018	0 ± 0	0.000999001	x
4410265	k__Bacteria; p__Firmicutes; c__Clostridia; o__Clostridiales; f__Veillonellaceae; g__Megasphaera; s__	0.065 ± 0.065	0 ± 0	0.000999001	x
4425368	k__Bacteria; p__Firmicutes; c__Clostridia; o__Clostridiales; f__Veillonellaceae; g__Megasphaera; s__	0.094 ± 0.094	0 ± 0	0.000999001	x
4427290	k__Bacteria; p__Firmicutes; c__Clostridia; o__Clostridiales; f__Ruminococcaceae; g__; s__	0 ± 0	0.01 ± 0.005	0.000999001	x
4427459	k__Bacteria; p__Firmicutes; c__Clostridia; o__Clostridiales; f__Ruminococcaceae; g__Ruminococcus; s__	0.003 ± 0.003	0 ± 0	0.000999001	x
4433737	k__Bacteria; p__Firmicutes; c__Clostridia; o__Clostridiales; f__Lachnospiraceae; g__; s__	0.006 ± 0.003	0 ± 0	0.000999001	x
4435400	k__Bacteria; p__Firmicutes; c__Clostridia; o__Clostridiales; f__Lachnospiraceae; g__; s__	0.009 ± 0.005	0 ± 0	0.000999001	x
4435655	k__Bacteria; p__Proteobacteria; c__Alphaproteobacteria; o__RF32; f__; g__; s__	0 ± 0	0.004 ± 0.004	0.000999001	x
4436552	k__Bacteria; p__Bacteroidetes; c__Bacteroidia; o__Bacteroidales; f__Prevotellaceae; g__Prevotella; s__copri	0.36 ± 0.36	0 ± 0	0.000999001	x
4437748	k__Bacteria; p__Firmicutes; c__Clostridia; o__Clostridiales; f__; g__; s__	0 ± 0	0.01 ± 0.01	0.000999001	x
4439360	k__Bacteria; p__Bacteroidetes; c__Bacteroidia; o__Bacteroidales; f__Bacteroidaceae; g__Bacteroides; s__	0.002 ± 0.002	0 ± 0	0.000999001	x
4443172	k__Bacteria; p__Firmicutes; c__Clostridia; o__Clostridiales; f__Lachnospiraceae; g__; s__	0.004 ± 0.003	0 ± 0	0.000999001	x
4447072	k__Bacteria; p__Bacteroidetes; c__Bacteroidia; o__Bacteroidales; f__Bacteroidaceae; g__Bacteroides; s__	0.01 ± 0.005	0 ± 0	0.000999001	x
4456702	k__Bacteria; p__Firmicutes; c__Clostridia; o__Clostridiales; f__Ruminococcaceae; g__Ruminococcus; s__	0.004 ± 0.003	0 ± 0	0.000999001	x
4457872	k__Bacteria; p__Bacteroidetes; c__Bacteroidia; o__Bacteroidales; f__Bacteroidaceae; g__Bacteroides; s__	0.004 ± 0.003	0 ± 0	0.000999001	x
4472174	k__Bacteria; p__Firmicutes; c__Clostridia; o__Clostridiales; f__Lachnospiraceae; g__[Ruminococcus]; s__	0.003 ± 0.002	0 ± 0	0.000999001	x
4480861	k__Bacteria; p__Firmicutes; c__Erysipelotrichi; o__Erysipelotrichales; f__Erysipelotrichaceae; g__Catenibacterium; s__	0 ± 0	0.133 ± 0.133	0.000999001	x
109633	k__Bacteria; p__Firmicutes; c__Clostridia; o__Clostridiales; f__Eubacteriaceae; g__Pseudoramibacter_Eubacterium; s__	0.002 ± 0.002	0 ± 0	0.00140478	x
174571	k__Bacteria; p__Firmicutes; c__Clostridia; o__Clostridiales; f__; g__; s__	0.002 ± 0.001	0 ± 0	0.00140478	x
175836	k__Bacteria; p__Firmicutes; c__Clostridia; o__Clostridiales; f__Ruminococcaceae; g__; s__	0.002 ± 0.001	0 ± 0	0.00140478	x
189548	k__Bacteria; p__Firmicutes; c__Clostridia; o__Clostridiales; f__Lachnospiraceae; g__; s__	0.002 ± 0.001	0 ± 0	0.00140478	x
195115	k__Bacteria; p__Firmicutes; c__Clostridia; o__Clostridiales; f__Lachnospiraceae; g__; s__	0.002 ± 0.001	0 ± 0	0.00140478	x
199081	k__Bacteria; p__Firmicutes; c__Clostridia; o__Clostridiales; f__Lachnospiraceae; g__Coprococcus; s__	0.002 ± 0.002	0 ± 0	0.00140478	x
199753	k__Bacteria; p__Firmicutes; c__Clostridia; o__Clostridiales; f__Lachnospiraceae; g__[Ruminococcus]; s__gnavus	0.002 ± 0.001	0 ± 0	0.00140478	x
258148	k__Bacteria; p__Firmicutes; c__Clostridia; o__Clostridiales; f__Lachnospiraceae; g__; s__	0.002 ± 0.002	0 ± 0	0.00140478	x
270094	k__Bacteria; p__Bacteroidetes; c__Bacteroidia; o__Bacteroidales; f__Bacteroidaceae; g__Bacteroides; s__	0.002 ± 0.001	0 ± 0	0.00140478	x
294710	k__Bacteria; p__Firmicutes; c__Clostridia; o__Clostridiales; f__Lachnospiraceae; g__; s__	0.002 ± 0.001	0 ± 0	0.00140478	x
316132	k__Bacteria; p__Bacteroidetes; c__Bacteroidia; o__Bacteroidales; f__Bacteroidaceae; g__Bacteroides; s__	0.002 ± 0.001	0 ± 0	0.00140478	x
340547	k__Bacteria; p__Bacteroidetes; c__Bacteroidia; o__Bacteroidales; f__Bacteroidaceae; g__Bacteroides; s__	0.002 ± 0.002	0 ± 0	0.00140478	x
348703	k__Bacteria; p__Firmicutes; c__Clostridia; o__Clostridiales; f__Ruminococcaceae; g__; s__	0.002 ± 0.002	0 ± 0	0.00140478	x
352529	k__Bacteria; p__Firmicutes; c__Clostridia; o__Clostridiales; f__Lachnospiraceae; g__[Ruminococcus]; s__	0.002 ± 0.002	0 ± 0	0.00140478	x
524725	k__Bacteria; p__Actinobacteria; c__Coriobacteriia; o__Coriobacteriales; f__Coriobacteriaceae; g__Atopobium; s__	0.002 ± 0.002	0 ± 0	0.00140478	x
566243	k__Bacteria; p__Proteobacteria; c__Gammaproteobacteria; o__Enterobacteriales; f__Enterobacteriaceae; g__; s__	0.002 ± 0.001	0 ± 0	0.00140478	x
578511	k__Bacteria; p__Firmicutes; c__Clostridia; o__Clostridiales; f__Lachnospiraceae; g__Coprococcus; s__	0.002 ± 0.002	0 ± 0	0.00140478	x
589277	k__Bacteria; p__Bacteroidetes; c__Bacteroidia; o__Bacteroidales; f__Bacteroidaceae; g__Bacteroides; s__	0.002 ± 0.001	0 ± 0	0.00140478	x
1747203	k__Bacteria; p__Firmicutes; c__Clostridia; o__Clostridiales; f__; g__; s__	0.002 ± 0.001	0 ± 0	0.00140478	x
2792266	k__Bacteria; p__Firmicutes; c__Clostridia; o__Clostridiales; f__Ruminococcaceae; g__Oscillospira; s__	0.002 ± 0.001	0 ± 0	0.00140478	x
4294457	k__Bacteria; p__Actinobacteria; c__Actinobacteria; o__Actinomycetales; f__Micrococcaceae; g__Rothia; s__mucilaginosa	0.002 ± 0.002	0 ± 0	0.00140478	x
4310208	k__Bacteria; p__Firmicutes; c__Clostridia; o__Clostridiales; f__Veillonellaceae; g__Veillonella; s__dispar	0.002 ± 0.001	0 ± 0	0.00140478	x
194053	k__Bacteria; p__Firmicutes; c__Clostridia; o__Clostridiales; f__Lachnospiraceae; g__Roseburia; s__	0.002 ± 0.002	0 ± 0	0.00179495	x
292289	k__Bacteria; p__Proteobacteria; c__Gammaproteobacteria; o__Enterobacteriales; f__Enterobacteriaceae; g__; s__	0.002 ± 0.001	0 ± 0	0.00179495	x
325848	k__Bacteria; p__Firmicutes; c__Clostridia; o__Clostridiales; f__Lachnospiraceae; g__Blautia; s__	0.002 ± 0.002	0 ± 0	0.00179495	x
348287	k__Bacteria; p__Firmicutes; c__Clostridia; o__Clostridiales; f__; g__; s__	0.002 ± 0.001	0 ± 0	0.00179495	x
585914	k__Bacteria; p__Bacteroidetes; c__Bacteroidia; o__Bacteroidales; f__Porphyromonadaceae; g__Parabacteroides; s__distasonis	0.002 ± 0.002	0 ± 0	0.00179495	x
4339832	k__Bacteria; p__Firmicutes; c__Clostridia; o__Clostridiales; f__Lachnospiraceae; g__; s__	0.002 ± 0.001	0 ± 0	0.00179495	x
4346374	k__Bacteria; p__Bacteroidetes; c__Bacteroidia; o__Bacteroidales; f__Bacteroidaceae; g__Bacteroides; s__	0.002 ± 0.002	0 ± 0	0.00179495	x
4406616	k__Bacteria; p__Firmicutes; c__Clostridia; o__Clostridiales; f__; g__; s__	0.002 ± 0.002	0 ± 0	0.00179495	x
147969	k__Bacteria; p__Firmicutes; c__Clostridia; o__Clostridiales; f__Ruminococcaceae; g__Ruminococcus; s__	0 ± 0	0.002 ± 0.002	0.0018079	x
181927	k__Bacteria; p__Firmicutes; c__Clostridia; o__Clostridiales; f__Lachnospiraceae; g__Blautia; s__	0 ± 0	0.002 ± 0.002	0.0018079	x
291254	k__Bacteria; p__Firmicutes; c__Clostridia; o__Clostridiales; f__Clostridiaceae; g__; s__	0 ± 0	0.002 ± 0.002	0.0018079	x
291421	k__Bacteria; p__Proteobacteria; c__Betaproteobacteria; o__Burkholderiales; f__Comamonadaceae; g__Comamonas; s__	0 ± 0	0.002 ± 0.001	0.0018079	x
347131	k__Bacteria; p__Firmicutes; c__Clostridia; o__Clostridiales; f__Clostridiaceae; g__Clostridium; s__hiranonis	0 ± 0	0.002 ± 0.002	0.0018079	x
358944	k__Bacteria; p__Firmicutes; c__Clostridia; o__Clostridiales; f__; g__; s__	0 ± 0	0.002 ± 0.001	0.0018079	x
686789	k__Bacteria; p__Firmicutes; c__Bacilli; o__Lactobacillales; f__Carnobacteriaceae; g__; s__	0 ± 0	0.002 ± 0.002	0.0018079	x
740317	k__Bacteria; p__Proteobacteria; c__Alphaproteobacteria; o__Rhizobiales; f__Bradyrhizobiaceae; g__; s__	0 ± 0	0.002 ± 0.001	0.0018079	x
4439398	k__Bacteria; p__Fusobacteria; c__Fusobacteriia; o__Fusobacteriales; f__Fusobacteriaceae; g__Fusobacterium; s__	0 ± 0	0.002 ± 0.002	0.0018079	x
181139	k__Bacteria; p__Firmicutes; c__Clostridia; o__Clostridiales; f__Ruminococcaceae; g__Faecalibacterium; s__prausnitzii	0.009 ± 0.004	0 ± 0	0.001998	x
230741	k__Bacteria; p__Firmicutes; c__Clostridia; o__Clostridiales; f__Lachnospiraceae; g__Blautia; s__	0.002 ± 0.001	0.008 ± 0.002	0.001998	x
350121	k__Bacteria; p__Firmicutes; c__Clostridia; o__Clostridiales; f__Ruminococcaceae; g__; s__	0.003 ± 0.001	0 ± 0	0.001998	x
4442508	k__Bacteria; p__Firmicutes; c__Clostridia; o__Clostridiales; f__Lachnospiraceae; g__; s__	0 ± 0	0.004 ± 0.003	0.001998	x
191148	k__Bacteria; p__Firmicutes; c__Clostridia; o__Clostridiales; f__Ruminococcaceae; g__; s__	0.002 ± 0.001	0 ± 0	0.002997	x
3767933	k__Bacteria; p__Firmicutes; c__Clostridia; o__Clostridiales; f__Lachnospiraceae; g__Dorea; s__	0.01 ± 0.005	0 ± 0	0.002997	x
3903651	k__Bacteria; p__Firmicutes; c__Clostridia; o__Clostridiales; f__Ruminococcaceae; g__Oscillospira; s__	0.004 ± 0.001	0 ± 0	0.002997	x
4337090	k__Bacteria; p__Firmicutes; c__Bacilli; o__Lactobacillales; f__Streptococcaceae; g__Streptococcus; s__	0 ± 0	0.004 ± 0.001	0.002997	x
178342	k__Bacteria; p__Firmicutes; c__Clostridia; o__Clostridiales; f__Ruminococcaceae; g__; s__	0.001 ± 0.001	0 ± 0	0.0031927	x
184725	k__Bacteria; p__Bacteroidetes; c__Bacteroidia; o__Bacteroidales; f__Rikenellaceae; g__; s__	0.001 ± 0.001	0 ± 0	0.0031927	x
185113	k__Bacteria; p__Firmicutes; c__Clostridia; o__Clostridiales; f__Ruminococcaceae; g__; s__	0.001 ± 0.001	0 ± 0	0.0031927	x
187178	k__Bacteria; p__Bacteroidetes; c__Bacteroidia; o__Bacteroidales; f__Bacteroidaceae; g__Bacteroides; s__	0.001 ± 0.001	0 ± 0	0.0031927	x
187751	k__Bacteria; p__Bacteroidetes; c__Bacteroidia; o__Bacteroidales; f__Bacteroidaceae; g__Bacteroides; s__plebeius	0.001 ± 0.001	0 ± 0	0.0031927	x
188348	k__Bacteria; p__Firmicutes; c__Clostridia; o__Clostridiales; f__Ruminococcaceae; g__; s__	0.001 ± 0.001	0 ± 0	0.0031927	x
188556	k__Bacteria; p__Firmicutes; c__Clostridia; o__Clostridiales; f__Ruminococcaceae; g__; s__	0.001 ± 0.001	0 ± 0	0.0031927	x
188598	k__Bacteria; p__Firmicutes; c__Clostridia; o__Clostridiales; f__Ruminococcaceae; g__; s__	0.001 ± 0.001	0 ± 0	0.0031927	x
190864	k__Bacteria; p__Firmicutes; c__Clostridia; o__Clostridiales; f__; g__; s__	0.001 ± 0.001	0 ± 0	0.0031927	x
196664	k__Bacteria; p__Bacteroidetes; c__Bacteroidia; o__Bacteroidales; f__Bacteroidaceae; g__Bacteroides; s__uniformis	0.001 ± 0.001	0 ± 0	0.0031927	x
298379	k__Bacteria; p__Firmicutes; c__Clostridia; o__Clostridiales; f__; g__; s__	0.001 ± 0.001	0 ± 0	0.0031927	x
326936	k__Bacteria; p__Firmicutes; c__Clostridia; o__Clostridiales; f__Lachnospiraceae; g__Blautia; s__	0.001 ± 0.001	0 ± 0	0.0031927	x
342110	k__Bacteria; p__Firmicutes; c__Clostridia; o__Clostridiales; f__Lachnospiraceae; g__Dorea; s__	0.001 ± 0.001	0 ± 0	0.0031927	x
342427	k__Bacteria; p__Firmicutes; c__Clostridia; o__Clostridiales; f__Veillonellaceae; g__Veillonella; s__dispar	0.001 ± 0.001	0 ± 0	0.0031927	x
1579962	k__Bacteria; p__Firmicutes; c__Clostridia; o__Clostridiales; f__Ruminococcaceae; g__; s__	0.001 ± 0.001	0 ± 0	0.0031927	x
2816372	k__Bacteria; p__Firmicutes; c__Clostridia; o__Clostridiales; f__Lachnospiraceae; g__; s__	0.001 ± 0.001	0 ± 0	0.0031927	x
4333499	k__Bacteria; p__Firmicutes; c__Clostridia; o__Clostridiales; f__Lachnospiraceae; g__; s__	0.001 ± 0.001	0 ± 0	0.0031927	x
4393565	k__Bacteria; p__Firmicutes; c__Clostridia; o__Clostridiales; f__; g__; s__	0.001 ± 0.001	0 ± 0	0.0031927	x
4410401	k__Bacteria; p__Firmicutes; c__Clostridia; o__Clostridiales; f__Veillonellaceae; g__Veillonella; s__dispar	0.001 ± 0.001	0 ± 0	0.0031927	x
89393	k__Bacteria; p__Proteobacteria; c__Gammaproteobacteria; o__Pseudomonadales; f__Pseudomonadaceae; g__Pseudomonas; s__viridiflava	0 ± 0	0.002 ± 0.001	0.00330492	x
131039	k__Bacteria; p__Firmicutes; c__Clostridia; o__Clostridiales; f__Ruminococcaceae; g__Oscillospira; s__	0 ± 0	0.002 ± 0.002	0.00330492	x
180052	k__Bacteria; p__Firmicutes; c__Clostridia; o__Clostridiales; f__; g__; s__	0 ± 0	0.002 ± 0.001	0.00330492	x
181689	k__Bacteria; p__Firmicutes; c__Clostridia; o__Clostridiales; f__; g__; s__	0 ± 0	0.002 ± 0.002	0.00330492	x
230479	k__Bacteria; p__Firmicutes; c__Clostridia; o__Clostridiales; f__Ruminococcaceae; g__; s__	0 ± 0	0.002 ± 0.001	0.00330492	x
288651	k__Bacteria; p__Firmicutes; c__Clostridia; o__Clostridiales; f__Ruminococcaceae; g__; s__	0 ± 0	0.002 ± 0.002	0.00330492	x
360508	k__Bacteria; p__Proteobacteria; c__Betaproteobacteria; o__Burkholderiales; f__Oxalobacteraceae; g__Oxalobacter; s__formigenes	0 ± 0	0.002 ± 0.002	0.00330492	x
362470	k__Bacteria; p__Firmicutes; c__Erysipelotrichi; o__Erysipelotrichales; f__Erysipelotrichaceae; g__cc_115; s__	0 ± 0	0.002 ± 0.002	0.00330492	x
389371	k__Bacteria; p__Firmicutes; c__Clostridia; o__Clostridiales; f__; g__; s__	0 ± 0	0.002 ± 0.002	0.00330492	x
1137718	k__Bacteria; p__Firmicutes; c__Bacilli; o__Lactobacillales; f__Leuconostocaceae; g__Fructobacillus; s__	0 ± 0	0.002 ± 0.001	0.00330492	x
4295707	k__Bacteria; p__Firmicutes; c__Erysipelotrichi; o__Erysipelotrichales; f__Erysipelotrichaceae; g__[Eubacterium]; s__biforme	0 ± 0	0.002 ± 0.002	0.00330492	x
4472050	k__Bacteria; p__Actinobacteria; c__Actinobacteria; o__Actinomycetales; f__Actinomycetaceae; g__; s__	0 ± 0	0.002 ± 0.001	0.00330492	x
189820	k__Bacteria; p__Firmicutes; c__Clostridia; o__Clostridiales; f__Ruminococcaceae; g__Ruminococcus; s__	0 ± 0	0.002 ± 0.001	0.00349339	x
377874	k__Bacteria; p__Firmicutes; c__Bacilli; o__Bacillales; f__Planococcaceae; g__; s__	0 ± 0	0.002 ± 0.002	0.00349339	x
558839	k__Bacteria; p__Bacteroidetes; c__Bacteroidia; o__Bacteroidales; f__Prevotellaceae; g__Prevotella; s__copri	0 ± 0	0.002 ± 0.001	0.00349339	x
4410938	k__Bacteria; p__Firmicutes; c__Erysipelotrichi; o__Erysipelotrichales; f__Erysipelotrichaceae; g__[Eubacterium]; s__biforme	0 ± 0	0.002 ± 0.002	0.00349339	x
197504	k__Bacteria; p__Firmicutes; c__Clostridia; o__Clostridiales; f__Lachnospiraceae; g__Blautia; s__	0 ± 0	0.006 ± 0.002	0.003996	x
332185	k__Bacteria; p__Firmicutes; c__Clostridia; o__Clostridiales; f__Ruminococcaceae; g__; s__	0.012 ± 0.005	0 ± 0	0.003996	x
523036	k__Bacteria; p__Firmicutes; c__Bacilli; o__Gemellales; f__Gemellaceae; g__; s__	0.002 ± 0.001	0.017 ± 0.008	0.003996	x
1566691	k__Bacteria; p__Proteobacteria; c__Gammaproteobacteria; o__Pseudomonadales; f__Pseudomonadaceae; g__Pseudomonas; s__	0.001 ± 0.001	0.014 ± 0.005	0.003996	x
12574	k__Bacteria; p__Actinobacteria; c__Actinobacteria; o__Actinomycetales; f__Actinomycetaceae; g__Actinomyces; s__	0 ± 0	0.012 ± 0.007	0.004995	x
143362	k__Bacteria; p__Proteobacteria; c__Gammaproteobacteria; o__Pseudomonadales; f__Moraxellaceae; g__Acinetobacter; s__	0 ± 0	0.002 ± 0.001	0.004995	x
4322588	k__Bacteria; p__Firmicutes; c__Bacilli; o__Lactobacillales; f__Streptococcaceae; g__Streptococcus; s__	0.001 ± 0	0.003 ± 0.001	0.004995	x
4481613	k__Bacteria; p__Actinobacteria; c__Coriobacteriia; o__Coriobacteriales; f__Coriobacteriaceae; g__Collinsella; s__aerofaciens	0.263 ± 0.116	2.399 ± 0.711	0.004995	x
4315958	k__Bacteria; p__Firmicutes; c__Bacilli; o__Lactobacillales; f__Streptococcaceae; g__Streptococcus; s__	0 ± 0	0.002 ± 0.002	0.00527362	x
179512	k__Bacteria; p__Firmicutes; c__Clostridia; o__Clostridiales; f__Clostridiaceae; g__SMB53; s__	0.005 ± 0.002	0.001 ± 0	0.00599401	x
185584	k__Bacteria; p__Firmicutes; c__Clostridia; o__Clostridiales; f__Ruminococcaceae; g__; s__	0.007 ± 0.002	0.001 ± 0	0.00599401	x
189997	k__Bacteria; p__Actinobacteria; c__Coriobacteriia; o__Coriobacteriales; f__Coriobacteriaceae; g__Collinsella; s__	0 ± 0	0.003 ± 0.001	0.00599401	x
194686	k__Bacteria; p__Firmicutes; c__Clostridia; o__Clostridiales; f__Ruminococcaceae; g__; s__	0.018 ± 0.012	0 ± 0	0.00599401	x
339087	k__Bacteria; p__Firmicutes; c__Clostridia; o__Clostridiales; f__Ruminococcaceae; g__Faecalibacterium; s__prausnitzii	0.011 ± 0.005	0.001 ± 0	0.00599401	x
174033	k__Bacteria; p__Firmicutes; c__Clostridia; o__Clostridiales; f__; g__; s__	0 ± 0	0.001 ± 0.001	0.00603413	x
187267	k__Bacteria; p__Firmicutes; c__Clostridia; o__Clostridiales; f__Ruminococcaceae; g__Oscillospira; s__	0 ± 0	0.001 ± 0.001	0.00603413	x
510295	k__Bacteria; p__Firmicutes; c__Clostridia; o__Clostridiales; f__Ruminococcaceae; g__; s__	0 ± 0	0.001 ± 0.001	0.00603413	x
791149	k__Bacteria; p__Proteobacteria; c__Gammaproteobacteria; o__Alteromonadales; f__Shewanellaceae; g__Shewanella; s__	0 ± 0	0.001 ± 0.001	0.00603413	x
926526	k__Bacteria; p__Actinobacteria; c__Actinobacteria; o__Actinomycetales; f__Micrococcaceae; g__Rothia; s__mucilaginosa	0 ± 0	0.001 ± 0.001	0.00603413	x
3369303	k__Bacteria; p__Firmicutes; c__Clostridia; o__Clostridiales; f__[Mogibacteriaceae]; g__; s__	0 ± 0	0.001 ± 0.001	0.00603413	x
4016971	k__Bacteria; p__TM7; c__TM7-3; o__; f__; g__; s__	0 ± 0	0.001 ± 0.001	0.00603413	x
4308811	k__Bacteria; p__Actinobacteria; c__Coriobacteriia; o__Coriobacteriales; f__Coriobacteriaceae; g__; s__	0 ± 0	0.001 ± 0.001	0.00603413	x
4343202	k__Bacteria; p__TM7; c__TM7-3; o__; f__; g__; s__	0 ± 0	0.001 ± 0.001	0.00603413	x
4389141	k__Bacteria; p__Firmicutes; c__Bacilli; o__Bacillales; f__Planococcaceae; g__Kurthia; s__gibsonii	0 ± 0	0.001 ± 0.001	0.00603413	x
4451899	k__Bacteria; p__Firmicutes; c__Clostridia; o__Clostridiales; f__Lachnospiraceae; g__; s__	0 ± 0	0.001 ± 0.001	0.00603413	x
174817	k__Bacteria; p__Firmicutes; c__Clostridia; o__Clostridiales; f__; g__; s__	0.002 ± 0.001	0 ± 0	0.00676629	x
190595	k__Bacteria; p__Firmicutes; c__Clostridia; o__Clostridiales; f__; g__; s__	0.002 ± 0.001	0 ± 0	0.00676629	x
191110	k__Bacteria; p__Firmicutes; c__Clostridia; o__Clostridiales; f__Lachnospiraceae; g__Roseburia; s__	0.002 ± 0.001	0 ± 0	0.00676629	x
194562	k__Bacteria; p__Firmicutes; c__Clostridia; o__Clostridiales; f__Ruminococcaceae; g__; s__	0.002 ± 0.001	0 ± 0	0.00676629	x
207487	k__Bacteria; p__Firmicutes; c__Clostridia; o__Clostridiales; f__Lachnospiraceae; g__Lachnospira; s__	0.002 ± 0.001	0 ± 0	0.00676629	x
2730676	k__Bacteria; p__Firmicutes; c__Clostridia; o__Clostridiales; f__Clostridiaceae; g__SMB53; s__	0.002 ± 0.002	0 ± 0	0.00676629	x
2862781	k__Bacteria; p__Proteobacteria; c__Gammaproteobacteria; o__Pasteurellales; f__Pasteurellaceae; g__Haemophilus; s__parainfluenzae	0.002 ± 0.001	0 ± 0	0.00676629	x
3907189	k__Bacteria; p__Firmicutes; c__Clostridia; o__Clostridiales; f__Lachnospiraceae; g__; s__	0.002 ± 0.001	0 ± 0	0.00676629	x
4370024	k__Bacteria; p__Firmicutes; c__Clostridia; o__Clostridiales; f__Lachnospiraceae; g__; s__	0.002 ± 0.001	0 ± 0	0.00676629	x
4380191	k__Bacteria; p__Firmicutes; c__Clostridia; o__Clostridiales; f__Lachnospiraceae; g__Roseburia; s__faecis	0.002 ± 0.002	0 ± 0	0.00676629	x
4465072	k__Bacteria; p__Firmicutes; c__Clostridia; o__Clostridiales; f__Ruminococcaceae; g__; s__	0.002 ± 0.001	0 ± 0	0.00676629	x
181728	k__Bacteria; p__Firmicutes; c__Clostridia; o__Clostridiales; f__Lachnospiraceae; g__[Ruminococcus]; s__	0.003 ± 0.002	0.098 ± 0.05	0.00699301	x
184678	k__Bacteria; p__Firmicutes; c__Clostridia; o__Clostridiales; f__Ruminococcaceae; g__Faecalibacterium; s__prausnitzii	0.005 ± 0.002	0 ± 0	0.00699301	x
866280	k__Bacteria; p__Actinobacteria; c__Actinobacteria; o__Actinomycetales; f__Micrococcaceae; g__Rothia; s__mucilaginosa	0 ± 0	0.009 ± 0.007	0.00699301	x
2574091	k__Bacteria; p__Firmicutes; c__Clostridia; o__Clostridiales; f__Lachnospiraceae; g__[Ruminococcus]; s__	0.016 ± 0.011	0.478 ± 0.245	0.00699301	x
2689396	k__Bacteria; p__Proteobacteria; c__Gammaproteobacteria; o__Enterobacteriales; f__Enterobacteriaceae; g__; s__	2.776 ± 1.416	0.043 ± 0.014	0.00699301	x
3408597	k__Bacteria; p__Firmicutes; c__Clostridia; o__Clostridiales; f__Lachnospiraceae; g__; s__	0.007 ± 0.003	0 ± 0	0.00699301	x
4191060	k__Bacteria; p__Firmicutes; c__Clostridia; o__Clostridiales; f__Lachnospiraceae; g__[Ruminococcus]; s__	0.001 ± 0.001	0.05 ± 0.028	0.00699301	x
121180	k__Bacteria; p__Proteobacteria; c__Gammaproteobacteria; o__Enterobacteriales; f__Enterobacteriaceae; g__; s__	0.001 ± 0.001	0 ± 0	0.00725619	x
174605	k__Bacteria; p__Firmicutes; c__Clostridia; o__Clostridiales; f__; g__; s__	0.001 ± 0.001	0 ± 0	0.00725619	x
179148	k__Bacteria; p__Firmicutes; c__Clostridia; o__Clostridiales; f__; g__; s__	0.001 ± 0.001	0 ± 0	0.00725619	x
179557	k__Bacteria; p__Firmicutes; c__Clostridia; o__Clostridiales; f__Lachnospiraceae; g__Blautia; s__	0.001 ± 0.001	0 ± 0	0.00725619	x
182874	k__Bacteria; p__Bacteroidetes; c__Bacteroidia; o__Bacteroidales; f__Bacteroidaceae; g__Bacteroides; s__	0.001 ± 0.001	0 ± 0	0.00725619	x
183579	k__Bacteria; p__Bacteroidetes; c__Bacteroidia; o__Bacteroidales; f__Bacteroidaceae; g__Bacteroides; s__	0.001 ± 0.001	0 ± 0	0.00725619	x
185937	k__Bacteria; p__Firmicutes; c__Clostridia; o__Clostridiales; f__Lachnospiraceae; g__; s__	0.001 ± 0.001	0 ± 0	0.00725619	x
190913	k__Bacteria; p__Bacteroidetes; c__Bacteroidia; o__Bacteroidales; f__Bacteroidaceae; g__Bacteroides; s__	0.001 ± 0.001	0 ± 0	0.00725619	x
191052	k__Bacteria; p__Firmicutes; c__Clostridia; o__Clostridiales; f__Lachnospiraceae; g__; s__	0.001 ± 0.001	0 ± 0	0.00725619	x
199301	k__Bacteria; p__Firmicutes; c__Clostridia; o__Clostridiales; f__Lachnospiraceae; g__; s__	0.001 ± 0.001	0 ± 0	0.00725619	x
299576	k__Bacteria; p__Actinobacteria; c__Actinobacteria; o__Actinomycetales; f__Corynebacteriaceae; g__Corynebacterium; s__variabile	0.001 ± 0.001	0 ± 0	0.00725619	x
315429	k__Bacteria; p__Bacteroidetes; c__Bacteroidia; o__Bacteroidales; f__Bacteroidaceae; g__Bacteroides; s__	0.001 ± 0.001	0 ± 0	0.00725619	x
348304	k__Bacteria; p__Bacteroidetes; c__Bacteroidia; o__Bacteroidales; f__Bacteroidaceae; g__Bacteroides; s__	0.001 ± 0.001	0 ± 0	0.00725619	x
352617	k__Bacteria; p__Bacteroidetes; c__Bacteroidia; o__Bacteroidales; f__Bacteroidaceae; g__Bacteroides; s__plebeius	0.001 ± 0.001	0 ± 0	0.00725619	x
360703	k__Bacteria; p__Firmicutes; c__Clostridia; o__Clostridiales; f__Lachnospiraceae; g__[Ruminococcus]; s__torques	0.001 ± 0.001	0 ± 0	0.00725619	x
362854	k__Bacteria; p__Firmicutes; c__Clostridia; o__Clostridiales; f__Ruminococcaceae; g__; s__	0.001 ± 0.001	0 ± 0	0.00725619	x
364563	k__Bacteria; p__Firmicutes; c__Clostridia; o__Clostridiales; f__Ruminococcaceae; g__Faecalibacterium; s__prausnitzii	0.001 ± 0.001	0 ± 0	0.00725619	x
862115	k__Bacteria; p__Proteobacteria; c__Gammaproteobacteria; o__Pasteurellales; f__Pasteurellaceae; g__Aggregatibacter; s__	0.001 ± 0.001	0 ± 0	0.00725619	x
1805553	k__Bacteria; p__Firmicutes; c__Clostridia; o__Clostridiales; f__Lachnospiraceae; g__[Ruminococcus]; s__gnavus	0.001 ± 0	0 ± 0	0.00725619	x
1906483	k__Bacteria; p__Bacteroidetes; c__Bacteroidia; o__Bacteroidales; f__Bacteroidaceae; g__Bacteroides; s__	0.001 ± 0.001	0 ± 0	0.00725619	x
2075910	k__Bacteria; p__Bacteroidetes; c__Bacteroidia; o__Bacteroidales; f__Prevotellaceae; g__Prevotella; s__copri	0.001 ± 0.001	0 ± 0	0.00725619	x
3195723	k__Bacteria; p__Firmicutes; c__Clostridia; o__Clostridiales; f__Ruminococcaceae; g__Oscillospira; s__	0.001 ± 0.001	0 ± 0	0.00725619	x
3756485	k__Bacteria; p__Firmicutes; c__Clostridia; o__Clostridiales; f__; g__; s__	0.001 ± 0	0 ± 0	0.00725619	x
4174963	k__Bacteria; p__Bacteroidetes; c__Bacteroidia; o__Bacteroidales; f__Bacteroidaceae; g__Bacteroides; s__	0.001 ± 0.001	0 ± 0	0.00725619	x
4390330	k__Bacteria; p__Firmicutes; c__Clostridia; o__Clostridiales; f__Ruminococcaceae; g__Ruminococcus; s__	0.001 ± 0.001	0 ± 0	0.00725619	x
4459708	k__Bacteria; p__Firmicutes; c__Clostridia; o__Clostridiales; f__Lachnospiraceae; g__; s__	0.001 ± 0.001	0 ± 0	0.00725619	x
4466616	k__Bacteria; p__Proteobacteria; c__Gammaproteobacteria; o__Pasteurellales; f__Pasteurellaceae; g__Haemophilus; s__parainfluenzae	0.001 ± 0.001	0 ± 0	0.00725619	x
4469007	k__Bacteria; p__Firmicutes; c__Clostridia; o__Clostridiales; f__; g__; s__	0.001 ± 0.001	0 ± 0	0.00725619	x
4475758	k__Bacteria; p__Firmicutes; c__Clostridia; o__Clostridiales; f__Veillonellaceae; g__Veillonella; s__dispar	0.001 ± 0.001	0 ± 0	0.00725619	x
185190	k__Bacteria; p__Firmicutes; c__Clostridia; o__Clostridiales; f__Lachnospiraceae; g__; s__	0.002 ± 0.001	0 ± 0	0.00743691	x
207126	k__Bacteria; p__Firmicutes; c__Clostridia; o__Clostridiales; f__Ruminococcaceae; g__; s__	0.002 ± 0.001	0 ± 0	0.00743691	x
529873	k__Bacteria; p__Firmicutes; c__Clostridia; o__Clostridiales; f__Lachnospiraceae; g__; s__	0.002 ± 0.002	0 ± 0	0.00743691	x
2814830	k__Bacteria; p__Firmicutes; c__Clostridia; o__Clostridiales; f__Ruminococcaceae; g__; s__	0.002 ± 0.001	0 ± 0	0.00743691	x
4387453	k__Bacteria; p__Firmicutes; c__Clostridia; o__Clostridiales; f__Clostridiaceae; g__; s__	0.002 ± 0.001	0 ± 0	0.00743691	x
4401580	k__Bacteria; p__Bacteroidetes; c__Bacteroidia; o__Bacteroidales; f__Bacteroidaceae; g__Bacteroides; s__	0.002 ± 0.002	0 ± 0	0.00743691	x
180155	k__Bacteria; p__Firmicutes; c__Clostridia; o__Clostridiales; f__Ruminococcaceae; g__; s__	0.012 ± 0.005	0.002 ± 0.001	0.00799201	x
188966	k__Bacteria; p__Actinobacteria; c__Coriobacteriia; o__Coriobacteriales; f__Coriobacteriaceae; g__; s__	0 ± 0	0.005 ± 0.003	0.00799201	x
189064	k__Bacteria; p__Firmicutes; c__Clostridia; o__Clostridiales; f__Ruminococcaceae; g__Faecalibacterium; s__prausnitzii	0.003 ± 0.001	0 ± 0	0.00799201	x
189828	k__Bacteria; p__Firmicutes; c__Clostridia; o__Clostridiales; f__Ruminococcaceae; g__; s__	0.018 ± 0.008	0.002 ± 0.001	0.00799201	x
2529285	k__Bacteria; p__Proteobacteria; c__Gammaproteobacteria; o__Enterobacteriales; f__Enterobacteriaceae; g__; s__	0.019 ± 0.008	0 ± 0	0.00799201	x
3040024	k__Bacteria; p__Firmicutes; c__Clostridia; o__Clostridiales; f__Lachnospiraceae; g__; s__	0 ± 0	0.005 ± 0.002	0.00799201	x
4391262	k__Bacteria; p__Proteobacteria; c__Gammaproteobacteria; o__Enterobacteriales; f__Enterobacteriaceae; g__; s__	2.388 ± 1.176	0.048 ± 0.015	0.00799201	x
312140	k__Bacteria; p__Bacteroidetes; c__Bacteroidia; o__Bacteroidales; f__Bacteroidaceae; g__Bacteroides; s__	0.014 ± 0.011	0 ± 0	0.00899101	x
3799784	k__Bacteria; p__Proteobacteria; c__Gammaproteobacteria; o__Enterobacteriales; f__Enterobacteriaceae; g__; s__	0.729 ± 0.37	0.012 ± 0.004	0.00899101	x
4316720	k__Bacteria; p__Proteobacteria; c__Gammaproteobacteria; o__Pseudomonadales; f__Pseudomonadaceae; g__; s__	0 ± 0	0.013 ± 0.011	0.00899101	x
4402645	k__Bacteria; p__Firmicutes; c__Clostridia; o__Clostridiales; f__; g__; s__	0 ± 0	0.014 ± 0.006	0.00899101	x
180556	k__Bacteria; p__Firmicutes; c__Clostridia; o__Clostridiales; f__Lachnospiraceae; g__; s__	0 ± 0	0.002 ± 0.001	0.00930662	x
186238	k__Bacteria; p__Firmicutes; c__Clostridia; o__Clostridiales; f__Lachnospiraceae; g__Coprococcus; s__	0 ± 0	0.002 ± 0.001	0.00930662	x
546876	k__Bacteria; p__Firmicutes; c__Clostridia; o__Clostridiales; f__Lachnospiraceae; g__; s__	0 ± 0	0.002 ± 0.001	0.00930662	x
113430	k__Bacteria; p__Firmicutes; c__Clostridia; o__Clostridiales; f__Ruminococcaceae; g__; s__	0.005 ± 0.002	0 ± 0	0.00999001	x
197481	k__Bacteria; p__Firmicutes; c__Clostridia; o__Clostridiales; f__Lachnospiraceae; g__Blautia; s__	0.005 ± 0.001	0.014 ± 0.003	0.00999001	x
357529	k__Bacteria; p__Firmicutes; c__Clostridia; o__Clostridiales; f__Clostridiaceae; g__Clostridium; s__	0.013 ± 0.005	0.001 ± 0	0.00999001	x
4373680	k__Bacteria; p__Firmicutes; c__Bacilli; o__Lactobacillales; f__Streptococcaceae; g__Streptococcus; s__	0.001 ± 0	0.004 ± 0.001	0.00999001	x
175703	k__Bacteria; p__Firmicutes; c__Clostridia; o__Clostridiales; f__; g__; s__	0.001 ± 0	0.003 ± 0.001	0.010989	x
182305	k__Bacteria; p__Firmicutes; c__Clostridia; o__Clostridiales; f__Lachnospiraceae; g__Dorea; s__	0 ± 0	0.005 ± 0.003	0.010989	x
183049	k__Bacteria; p__Firmicutes; c__Clostridia; o__Clostridiales; f__Ruminococcaceae; g__Faecalibacterium; s__prausnitzii	0.007 ± 0.005	0 ± 0	0.010989	x
802262	k__Bacteria; p__Firmicutes; c__Bacilli; o__Lactobacillales; f__Streptococcaceae; g__Streptococcus; s__	0.001 ± 0.001	0.008 ± 0.002	0.010989	x
122049	k__Bacteria; p__Proteobacteria; c__Gammaproteobacteria; o__Enterobacteriales; f__Enterobacteriaceae; g__; s__	0 ± 0	0.001 ± 0.001	0.0110763	x
174516	k__Bacteria; p__Firmicutes; c__Clostridia; o__Clostridiales; f__Clostridiaceae; g__Clostridium; s__	0 ± 0	0.001 ± 0.001	0.0110763	x
175978	k__Bacteria; p__Firmicutes; c__Clostridia; o__Clostridiales; f__Lachnospiraceae; g__Dorea; s__	0 ± 0	0.001 ± 0.001	0.0110763	x
178018	k__Bacteria; p__Firmicutes; c__Clostridia; o__Clostridiales; f__Lachnospiraceae; g__; s__	0 ± 0	0.001 ± 0.001	0.0110763	x
267689	k__Bacteria; p__Firmicutes; c__Clostridia; o__Clostridiales; f__Ruminococcaceae; g__; s__	0 ± 0	0.001 ± 0.001	0.0110763	x
365056	k__Bacteria; p__Firmicutes; c__Clostridia; o__Clostridiales; f__[Tissierellaceae]; g__Anaerococcus; s__	0 ± 0	0.001 ± 0.001	0.0110763	x
366633	k__Bacteria; p__Firmicutes; c__Clostridia; o__Clostridiales; f__Ruminococcaceae; g__; s__	0 ± 0	0.001 ± 0.001	0.0110763	x
760967	k__Bacteria; p__Bacteroidetes; c__Bacteroidia; o__Bacteroidales; f__Prevotellaceae; g__Prevotella; s__	0 ± 0	0.001 ± 0.001	0.0110763	x
2026051	k__Bacteria; p__Firmicutes; c__Bacilli; o__Lactobacillales; f__; g__; s__	0 ± 0	0.001 ± 0.001	0.0110763	x
2035204	k__Bacteria; p__Proteobacteria; c__Gammaproteobacteria; o__Aeromonadales; f__Aeromonadaceae; g__; s__	0 ± 0	0.001 ± 0.001	0.0110763	x
2038560	k__Bacteria; p__Firmicutes; c__Bacilli; o__Bacillales; f__Staphylococcaceae; g__Jeotgalicoccus; s__	0 ± 0	0.001 ± 0.001	0.0110763	x
3172379	k__Bacteria; p__Firmicutes; c__Clostridia; o__Clostridiales; f__Lachnospiraceae; g__Dorea; s__	0 ± 0	0.001 ± 0.001	0.0110763	x
3422630	k__Bacteria; p__Firmicutes; c__Clostridia; o__Clostridiales; f__Ruminococcaceae; g__; s__	0 ± 0	0.001 ± 0.001	0.0110763	x
185240	k__Bacteria; p__Firmicutes; c__Clostridia; o__Clostridiales; f__Lachnospiraceae; g__Blautia; s__	0 ± 0	0.003 ± 0.001	0.011988	x
195997	k__Bacteria; p__Firmicutes; c__Clostridia; o__Clostridiales; f__Lachnospiraceae; g__; s__	0.006 ± 0.002	0.014 ± 0.002	0.011988	x
216599	k__Bacteria; p__Bacteroidetes; c__Bacteroidia; o__Bacteroidales; f__Rikenellaceae; g__; s__	0 ± 0	0.009 ± 0.005	0.011988	x
365385	k__Bacteria; p__Actinobacteria; c__Actinobacteria; o__Bifidobacteriales; f__Bifidobacteriaceae; g__Bifidobacterium; s__bifidum	0.392 ± 0.295	2.187 ± 0.571	0.011988	x
178478	k__Bacteria; p__Bacteroidetes; c__Bacteroidia; o__Bacteroidales; f__Bacteroidaceae; g__Bacteroides; s__	0.007 ± 0.005	0 ± 0	0.012987	x
178629	k__Bacteria; p__Firmicutes; c__Clostridia; o__Clostridiales; f__Lachnospiraceae; g__Coprococcus; s__	0.01 ± 0.003	0.023 ± 0.004	0.012987	x
191442	k__Bacteria; p__Firmicutes; c__Clostridia; o__Clostridiales; f__Ruminococcaceae; g__; s__	0.019 ± 0.007	0.003 ± 0.001	0.012987	x
193873	k__Bacteria; p__Firmicutes; c__Clostridia; o__Clostridiales; f__Ruminococcaceae; g__; s__	0.006 ± 0.003	0 ± 0	0.012987	x
1986324	k__Bacteria; p__Firmicutes; c__Clostridia; o__Clostridiales; f__Clostridiaceae; g__; s__	0 ± 0	0.004 ± 0.002	0.012987	x
4374302	k__Bacteria; p__Firmicutes; c__Clostridia; o__Clostridiales; f__Lachnospiraceae; g__Dorea; s__	0.047 ± 0.019	0.417 ± 0.208	0.012987	x
4457268	k__Bacteria; p__Proteobacteria; c__Gammaproteobacteria; o__Enterobacteriales; f__Enterobacteriaceae; g__; s__	0.106 ± 0.062	0.002 ± 0.001	0.012987	x
180352	k__Bacteria; p__Firmicutes; c__Clostridia; o__Clostridiales; f__; g__; s__	0.002 ± 0.002	0 ± 0	0.0131143	x
186772	k__Bacteria; p__Firmicutes; c__Clostridia; o__Clostridiales; f__Ruminococcaceae; g__; s__	0.002 ± 0.001	0 ± 0	0.0131143	x
191222	k__Bacteria; p__Firmicutes; c__Clostridia; o__Clostridiales; f__Ruminococcaceae; g__Oscillospira; s__	0.002 ± 0.001	0 ± 0	0.0131143	x
2877094	k__Bacteria; p__Firmicutes; c__Clostridia; o__Clostridiales; f__Lachnospiraceae; g__; s__	0.002 ± 0.001	0 ± 0	0.0131143	x
4143073	k__Bacteria; p__Firmicutes; c__Clostridia; o__Clostridiales; f__; g__; s__	0.002 ± 0.001	0 ± 0	0.0131143	x
183815	k__Bacteria; p__Firmicutes; c__Clostridia; o__Clostridiales; f__; g__; s__	0.005 ± 0.002	0 ± 0	0.013986	x
184000	k__Bacteria; p__Firmicutes; c__Clostridia; o__Clostridiales; f__Ruminococcaceae; g__Faecalibacterium; s__prausnitzii	0.015 ± 0.008	0.002 ± 0.001	0.013986	x
186687	k__Bacteria; p__Firmicutes; c__Clostridia; o__Clostridiales; f__Lachnospiraceae; g__; s__	0.002 ± 0.001	0.006 ± 0.001	0.013986	x
187891	k__Bacteria; p__Firmicutes; c__Clostridia; o__Clostridiales; f__Lachnospiraceae; g__Blautia; s__	0.001 ± 0	0.005 ± 0.002	0.013986	x
2762219	k__Bacteria; p__Firmicutes; c__Clostridia; o__Clostridiales; f__Lachnospiraceae; g__; s__	0.01 ± 0.005	0.001 ± 0	0.013986	x
175280	k__Bacteria; p__Firmicutes; c__Clostridia; o__Clostridiales; f__Lachnospiraceae; g__; s__	0.002 ± 0.001	0 ± 0	0.0141545	x
176967	k__Bacteria; p__Firmicutes; c__Clostridia; o__Clostridiales; f__Ruminococcaceae; g__; s__	0.002 ± 0.001	0 ± 0	0.0141545	x
358112	k__Bacteria; p__Firmicutes; c__Clostridia; o__Clostridiales; f__; g__; s__	0.002 ± 0.001	0 ± 0	0.0141545	x
4390972	k__Bacteria; p__Firmicutes; c__Clostridia; o__Clostridiales; f__Ruminococcaceae; g__; s__	0.002 ± 0.002	0 ± 0	0.0141545	x
4232048	k__Bacteria; p__Firmicutes; c__Clostridia; o__Clostridiales; f__Lachnospiraceae; g__Dorea; s__formicigenerans	0.004 ± 0.002	0.037 ± 0.021	0.014985	x
188676	k__Bacteria; p__Firmicutes; c__Clostridia; o__Clostridiales; f__Ruminococcaceae; g__; s__	0.004 ± 0.002	0 ± 0	0.015984	x
193915	k__Bacteria; p__Firmicutes; c__Clostridia; o__Clostridiales; f__Ruminococcaceae; g__; s__	0.003 ± 0.001	0 ± 0	0.015984	x
196371	k__Bacteria; p__Firmicutes; c__Clostridia; o__Clostridiales; f__; g__; s__	0.027 ± 0.007	0.087 ± 0.029	0.015984	x
199047	k__Bacteria; p__Firmicutes; c__Clostridia; o__Clostridiales; f__Ruminococcaceae; g__; s__	0.002 ± 0.001	0 ± 0	0.015984	x
190599	k__Bacteria; p__Firmicutes; c__Clostridia; o__Clostridiales; f__Lachnospiraceae; g__Coprococcus; s__	0 ± 0	0.002 ± 0.001	0.0164048	x
241843	k__Bacteria; p__Firmicutes; c__Clostridia; o__Clostridiales; f__Clostridiaceae; g__; s__	0 ± 0	0.002 ± 0.001	0.0164048	x
628400	k__Bacteria; p__Proteobacteria; c__Alphaproteobacteria; o__Rhizobiales; f__Rhizobiaceae; g__Agrobacterium; s__	0 ± 0	0.002 ± 0.002	0.0164048	x
3450454	k__Bacteria; p__Firmicutes; c__Clostridia; o__Clostridiales; f__Lachnospiraceae; g__Roseburia; s__	0 ± 0	0.002 ± 0.001	0.0164048	x
4447605	k__Bacteria; p__Firmicutes; c__Clostridia; o__Clostridiales; f__Lachnospiraceae; g__; s__	0 ± 0	0.002 ± 0.001	0.0164048	x
158625	k__Bacteria; p__Firmicutes; c__Clostridia; o__Clostridiales; f__Ruminococcaceae; g__; s__	0.001 ± 0	0 ± 0	0.0164914	x
168071	k__Bacteria; p__Firmicutes; c__Clostridia; o__Clostridiales; f__Lachnospiraceae; g__; s__	0.001 ± 0.001	0 ± 0	0.0164914	x
178773	k__Bacteria; p__Firmicutes; c__Clostridia; o__Clostridiales; f__Ruminococcaceae; g__; s__	0.001 ± 0.001	0 ± 0	0.0164914	x
180606	k__Bacteria; p__Bacteroidetes; c__Bacteroidia; o__Bacteroidales; f__Bacteroidaceae; g__Bacteroides; s__ovatus	0.001 ± 0.001	0 ± 0	0.0164914	x
182653	k__Bacteria; p__Firmicutes; c__Clostridia; o__Clostridiales; f__Lachnospiraceae; g__Dorea; s__	0.001 ± 0.001	0 ± 0	0.0164914	x
186956	k__Bacteria; p__Firmicutes; c__Clostridia; o__Clostridiales; f__Ruminococcaceae; g__; s__	0.001 ± 0.001	0 ± 0	0.0164914	x
191391	k__Bacteria; p__Firmicutes; c__Clostridia; o__Clostridiales; f__Ruminococcaceae; g__; s__	0.001 ± 0.001	0 ± 0	0.0164914	x
192339	k__Bacteria; p__Firmicutes; c__Clostridia; o__Clostridiales; f__Ruminococcaceae; g__; s__	0.001 ± 0.001	0 ± 0	0.0164914	x
208739	k__Bacteria; p__Firmicutes; c__Clostridia; o__Clostridiales; f__Ruminococcaceae; g__Faecalibacterium; s__prausnitzii	0.001 ± 0	0 ± 0	0.0164914	x
251702	k__Bacteria; p__Actinobacteria; c__Coriobacteriia; o__Coriobacteriales; f__Coriobacteriaceae; g__Atopobium; s__rimae	0.001 ± 0.001	0 ± 0	0.0164914	x
296103	k__Bacteria; p__Firmicutes; c__Clostridia; o__Clostridiales; f__Lachnospiraceae; g__; s__	0.001 ± 0.001	0 ± 0	0.0164914	x
305247	k__Bacteria; p__Firmicutes; c__Clostridia; o__Clostridiales; f__Lachnospiraceae; g__; s__	0.001 ± 0.001	0 ± 0	0.0164914	x
311950	k__Bacteria; p__Bacteroidetes; c__Bacteroidia; o__Bacteroidales; f__Bacteroidaceae; g__Bacteroides; s__plebeius	0.001 ± 0.001	0 ± 0	0.0164914	x
329520	k__Bacteria; p__Firmicutes; c__Clostridia; o__Clostridiales; f__Lachnospiraceae; g__; s__	0.001 ± 0.001	0 ± 0	0.0164914	x
345111	k__Bacteria; p__Firmicutes; c__Clostridia; o__Clostridiales; f__Lachnospiraceae; g__; s__	0.001 ± 0.001	0 ± 0	0.0164914	x
365717	k__Bacteria; p__Firmicutes; c__Clostridia; o__Clostridiales; f__Ruminococcaceae; g__Faecalibacterium; s__prausnitzii	0.001 ± 0	0 ± 0	0.0164914	x
368318	k__Bacteria; p__Firmicutes; c__Clostridia; o__Clostridiales; f__Lachnospiraceae; g__Blautia; s__	0.001 ± 0.001	0 ± 0	0.0164914	x
1602307	k__Bacteria; p__Proteobacteria; c__Betaproteobacteria; o__Burkholderiales; f__Alcaligenaceae; g__Sutterella; s__	0.001 ± 0.001	0 ± 0	0.0164914	x
1733364	k__Bacteria; p__Bacteroidetes; c__Bacteroidia; o__Bacteroidales; f__Bacteroidaceae; g__Bacteroides; s__uniformis	0.001 ± 0.001	0 ± 0	0.0164914	x
1888677	k__Bacteria; p__Firmicutes; c__Bacilli; o__Lactobacillales; f__Streptococcaceae; g__Streptococcus; s__anginosus	0.001 ± 0.001	0 ± 0	0.0164914	x
2318202	k__Bacteria; p__Firmicutes; c__Clostridia; o__Clostridiales; f__Ruminococcaceae; g__Oscillospira; s__	0.001 ± 0.001	0 ± 0	0.0164914	x
2986828	k__Bacteria; p__Firmicutes; c__Clostridia; o__Clostridiales; f__Lachnospiraceae; g__; s__	0.001 ± 0.001	0 ± 0	0.0164914	x
3141094	k__Bacteria; p__Bacteroidetes; c__Bacteroidia; o__Bacteroidales; f__Bacteroidaceae; g__Bacteroides; s__	0.001 ± 0.001	0 ± 0	0.0164914	x
3408594	k__Bacteria; p__Firmicutes; c__Clostridia; o__Clostridiales; f__Lachnospiraceae; g__; s__	0.001 ± 0.001	0 ± 0	0.0164914	x
3430935	k__Bacteria; p__Firmicutes; c__Clostridia; o__Clostridiales; f__Ruminococcaceae; g__Faecalibacterium; s__prausnitzii	0.001 ± 0.001	0 ± 0	0.0164914	x
3588390	k__Bacteria; p__Bacteroidetes; c__Bacteroidia; o__Bacteroidales; f__Bacteroidaceae; g__Bacteroides; s__	0.001 ± 0.001	0 ± 0	0.0164914	x
3709988	k__Bacteria; p__Firmicutes; c__Clostridia; o__Clostridiales; f__Lachnospiraceae; g__; s__	0.001 ± 0.001	0 ± 0	0.0164914	x
3768971	k__Bacteria; p__Firmicutes; c__Clostridia; o__Clostridiales; f__Peptococcaceae; g__; s__	0.001 ± 0.001	0 ± 0	0.0164914	x
3797933	k__Bacteria; p__Firmicutes; c__Clostridia; o__Clostridiales; f__Lachnospiraceae; g__; s__	0.001 ± 0.001	0 ± 0	0.0164914	x
4343184	k__Bacteria; p__Firmicutes; c__Clostridia; o__Clostridiales; f__Lachnospiraceae; g__; s__	0.001 ± 0	0 ± 0	0.0164914	x
4391009	k__Bacteria; p__Proteobacteria; c__Betaproteobacteria; o__Burkholderiales; f__Alcaligenaceae; g__Sutterella; s__	0.001 ± 0.001	0 ± 0	0.0164914	x
4401226	k__Bacteria; p__TM7; c__TM7-3; o__; f__; g__; s__	0.001 ± 0.001	0 ± 0	0.0164914	x
4421070	k__Bacteria; p__Bacteroidetes; c__Bacteroidia; o__Bacteroidales; f__Bacteroidaceae; g__Bacteroides; s__	0.001 ± 0.001	0 ± 0	0.0164914	x
4422727	k__Bacteria; p__Firmicutes; c__Clostridia; o__Clostridiales; f__Lachnospiraceae; g__; s__	0.001 ± 0.001	0 ± 0	0.0164914	x
4452633	k__Bacteria; p__Firmicutes; c__Clostridia; o__Clostridiales; f__Clostridiaceae; g__; s__	0.001 ± 0.001	0 ± 0	0.0164914	x
4094866	k__Bacteria; p__Firmicutes; c__Clostridia; o__Clostridiales; f__Lachnospiraceae; g__; s__	0.01 ± 0.005	0 ± 0	0.016983	x
4446902	k__Bacteria; p__Firmicutes; c__Bacilli; o__Gemellales; f__Gemellaceae; g__; s__	0.004 ± 0.002	0.016 ± 0.004	0.016983	x
179200	k__Bacteria; p__Firmicutes; c__Clostridia; o__Clostridiales; f__Ruminococcaceae; g__; s__	0.01 ± 0.003	0.003 ± 0.001	0.017982	x
4402254	k__Bacteria; p__Firmicutes; c__Bacilli; o__Lactobacillales; f__Streptococcaceae; g__Streptococcus; s__	0.016 ± 0.005	0.087 ± 0.028	0.017982	x
183855	k__Bacteria; p__Firmicutes; c__Clostridia; o__Clostridiales; f__Lachnospiraceae; g__Dorea; s__	0 ± 0	0.002 ± 0.002	0.0180231	x
190641	k__Bacteria; p__Firmicutes; c__Clostridia; o__Clostridiales; f__Lachnospiraceae; g__Coprococcus; s__	0 ± 0	0.002 ± 0.001	0.0180231	x
4318208	k__Bacteria; p__Bacteroidetes; c__Bacteroidia; o__Bacteroidales; f__Prevotellaceae; g__Prevotella; s__copri	0 ± 0	0.002 ± 0.001	0.0180231	x
181140	k__Bacteria; p__Firmicutes; c__Clostridia; o__Clostridiales; f__; g__; s__	0.004 ± 0.002	0 ± 0	0.018981	x
186596	k__Bacteria; p__Firmicutes; c__Clostridia; o__Clostridiales; f__; g__; s__	0 ± 0	0.002 ± 0.001	0.018981	x
193575	k__Bacteria; p__Actinobacteria; c__Coriobacteriia; o__Coriobacteriales; f__Coriobacteriaceae; g__Collinsella; s__aerofaciens	0.001 ± 0	0.003 ± 0.001	0.018981	x
185763	k__Bacteria; p__Firmicutes; c__Clostridia; o__Clostridiales; f__Ruminococcaceae; g__Faecalibacterium; s__prausnitzii	0.016 ± 0.007	0.001 ± 0.001	0.01998	x
190191	k__Bacteria; p__Firmicutes; c__Clostridia; o__Clostridiales; f__Lachnospiraceae; g__; s__	0.001 ± 0.001	0.005 ± 0.002	0.01998	x
293307	k__Bacteria; p__Firmicutes; c__Clostridia; o__Clostridiales; f__Lachnospiraceae; g__Blautia; s__	0.005 ± 0.002	0.012 ± 0.002	0.01998	x
5158	k__Bacteria; p__Proteobacteria; c__Alphaproteobacteria; o__Rhizobiales; f__Phyllobacteriaceae; g__Phyllobacterium; s__	0 ± 0	0.001 ± 0.001	0.0204634	x
133961	k__Bacteria; p__Proteobacteria; c__Gammaproteobacteria; o__Pseudomonadales; f__Pseudomonadaceae; g__Pseudomonas; s__	0 ± 0	0.001 ± 0.001	0.0204634	x
157772	k__Bacteria; p__Firmicutes; c__Clostridia; o__Clostridiales; f__Ruminococcaceae; g__Oscillospira; s__	0 ± 0	0.001 ± 0.001	0.0204634	x
178712	k__Bacteria; p__Firmicutes; c__Clostridia; o__Clostridiales; f__; g__; s__	0 ± 0	0.001 ± 0.001	0.0204634	x
183104	k__Bacteria; p__Actinobacteria; c__Coriobacteriia; o__Coriobacteriales; f__Coriobacteriaceae; g__; s__	0 ± 0	0.001 ± 0.001	0.0204634	x
194087	k__Bacteria; p__Firmicutes; c__Clostridia; o__Clostridiales; f__Lachnospiraceae; g__; s__	0 ± 0	0.001 ± 0.001	0.0204634	x
195998	k__Bacteria; p__Firmicutes; c__Clostridia; o__Clostridiales; f__; g__; s__	0 ± 0	0.001 ± 0.001	0.0204634	x
227565	k__Bacteria; p__Firmicutes; c__Clostridia; o__Clostridiales; f__Ruminococcaceae; g__; s__	0 ± 0	0.001 ± 0.001	0.0204634	x
291510	k__Bacteria; p__Firmicutes; c__Bacilli; o__Lactobacillales; f__Streptococcaceae; g__Lactococcus; s__	0 ± 0	0.001 ± 0.001	0.0204634	x
330714	k__Bacteria; p__Firmicutes; c__Clostridia; o__Clostridiales; f__Clostridiaceae; g__Clostridium; s__	0 ± 0	0.001 ± 0.001	0.0204634	x
349963	k__Bacteria; p__Firmicutes; c__Clostridia; o__Clostridiales; f__Ruminococcaceae; g__; s__	0 ± 0	0.001 ± 0.001	0.0204634	x
350697	k__Bacteria; p__Firmicutes; c__Clostridia; o__Clostridiales; f__Peptostreptococcaceae; g__; s__	0 ± 0	0.001 ± 0.001	0.0204634	x
367814	k__Bacteria; p__Firmicutes; c__Clostridia; o__Clostridiales; f__Ruminococcaceae; g__Anaerotruncus; s__	0 ± 0	0.001 ± 0.001	0.0204634	x
518460	k__Bacteria; p__Firmicutes; c__Clostridia; o__Clostridiales; f__Lachnospiraceae; g__Coprococcus; s__	0 ± 0	0.001 ± 0.001	0.0204634	x
528357	k__Bacteria; p__Firmicutes; c__Bacilli; o__Lactobacillales; f__Streptococcaceae; g__Streptococcus; s__	0 ± 0	0.001 ± 0.001	0.0204634	x
571744	k__Bacteria; p__Firmicutes; c__Bacilli; o__Lactobacillales; f__Streptococcaceae; g__Lactococcus; s__	0 ± 0	0.001 ± 0.001	0.0204634	x
750071	k__Bacteria; p__Bacteroidetes; c__Bacteroidia; o__Bacteroidales; f__[Paraprevotellaceae]; g__; s__	0 ± 0	0.001 ± 0.001	0.0204634	x
848915	k__Bacteria; p__Firmicutes; c__Clostridia; o__Clostridiales; f__Ruminococcaceae; g__Oscillospira; s__	0 ± 0	0.001 ± 0.001	0.0204634	x
2922355	k__Bacteria; p__Firmicutes; c__Clostridia; o__Clostridiales; f__Clostridiaceae; g__; s__	0 ± 0	0.001 ± 0.001	0.0204634	x
3128077	k__Bacteria; p__Firmicutes; c__Clostridia; o__Clostridiales; f__Veillonellaceae; g__Veillonella; s__	0 ± 0	0.001 ± 0.001	0.0204634	x
3133081	k__Bacteria; p__Proteobacteria; c__Alphaproteobacteria; o__Rhodobacterales; f__Rhodobacteraceae; g__; s__	0 ± 0	0.001 ± 0.001	0.0204634	x
4296424	k__Bacteria; p__Actinobacteria; c__Actinobacteria; o__Actinomycetales; f__Actinomycetaceae; g__Actinomyces; s__	0 ± 0	0.001 ± 0.001	0.0204634	x
4318125	k__Bacteria; p__Firmicutes; c__Clostridia; o__Clostridiales; f__Lachnospiraceae; g__; s__	0 ± 0	0.001 ± 0.001	0.0204634	x
4318356	k__Bacteria; p__Verrucomicrobia; c__[Spartobacteria]; o__[Chthoniobacterales]; f__[Chthoniobacteraceae]; g__; s__	0 ± 0	0.001 ± 0.001	0.0204634	x
4398588	k__Bacteria; p__Firmicutes; c__Clostridia; o__Clostridiales; f__Ruminococcaceae; g__; s__	0 ± 0	0.001 ± 0.001	0.0204634	x
4416763	k__Bacteria; p__Firmicutes; c__Bacilli; o__Lactobacillales; f__Streptococcaceae; g__Streptococcus; s__	0 ± 0	0.001 ± 0.001	0.0204634	x
4425214	k__Bacteria; p__Firmicutes; c__Bacilli; o__Lactobacillales; f__Streptococcaceae; g__Streptococcus; s__	0 ± 0	0.001 ± 0.001	0.0204634	x
114510	k__Bacteria; p__Proteobacteria; c__Gammaproteobacteria; o__Enterobacteriales; f__Enterobacteriaceae; g__; s__	0.101 ± 0.053	0.002 ± 0.001	0.020979	x
176604	k__Bacteria; p__Firmicutes; c__Clostridia; o__Clostridiales; f__Lachnospiraceae; g__; s__	0.012 ± 0.005	0.001 ± 0.001	0.020979	x
177342	k__Bacteria; p__Firmicutes; c__Clostridia; o__Clostridiales; f__Ruminococcaceae; g__; s__	0.004 ± 0.002	0 ± 0	0.020979	x
178122	k__Bacteria; p__Firmicutes; c__Clostridia; o__Clostridiales; f__Lachnospiraceae; g__; s__	0.01 ± 0.004	0.041 ± 0.012	0.020979	x
782953	k__Bacteria; p__Proteobacteria; c__Gammaproteobacteria; o__Enterobacteriales; f__Enterobacteriaceae; g__; s__	0.015 ± 0.006	0.001 ± 0	0.020979	x
180572	k__Bacteria; p__Firmicutes; c__Clostridia; o__Clostridiales; f__Ruminococcaceae; g__Faecalibacterium; s__prausnitzii	0.016 ± 0.006	0.002 ± 0.002	0.021978	x
190607	k__Bacteria; p__Firmicutes; c__Clostridia; o__Clostridiales; f__Lachnospiraceae; g__; s__	0.023 ± 0.015	0.001 ± 0	0.021978	x
197164	k__Bacteria; p__Firmicutes; c__Clostridia; o__Clostridiales; f__Ruminococcaceae; g__; s__	0.011 ± 0.006	0.001 ± 0	0.021978	x
592616	k__Bacteria; p__Firmicutes; c__Erysipelotrichi; o__Erysipelotrichales; f__Erysipelotrichaceae; g__; s__	0.074 ± 0.028	0.199 ± 0.046	0.021978	x
186263	k__Bacteria; p__Firmicutes; c__Clostridia; o__Clostridiales; f__Lachnospiraceae; g__; s__	0.002 ± 0.001	0 ± 0	0.0229665	x
190453	k__Bacteria; p__Firmicutes; c__Clostridia; o__Clostridiales; f__Ruminococcaceae; g__; s__	0.002 ± 0.002	0 ± 0	0.0229665	x
191034	k__Bacteria; p__Firmicutes; c__Clostridia; o__Clostridiales; f__Lachnospiraceae; g__Blautia; s__	0.002 ± 0.001	0 ± 0	0.0229665	x
4386761	k__Bacteria; p__Bacteroidetes; c__Bacteroidia; o__Bacteroidales; f__Bacteroidaceae; g__Bacteroides; s__	0.002 ± 0.001	0 ± 0	0.0229665	x
526682	k__Bacteria; p__Actinobacteria; c__Actinobacteria; o__Actinomycetales; f__Actinomycetaceae; g__Actinomyces; s__	0.001 ± 0.001	0.005 ± 0.001	0.022977	x
825808	k__Bacteria; p__Actinobacteria; c__Actinobacteria; o__Bifidobacteriales; f__Bifidobacteriaceae; g__Bifidobacterium; s__	3.376 ± 1.961	15.816 ± 4.643	0.022977	x
174497	k__Bacteria; p__Firmicutes; c__Clostridia; o__Clostridiales; f__Clostridiaceae; g__Clostridium; s__	0.003 ± 0.002	0 ± 0	0.023976	x
180285	k__Bacteria; p__Firmicutes; c__Clostridia; o__Clostridiales; f__Ruminococcaceae; g__; s__	0.006 ± 0.002	0.001 ± 0	0.023976	x
189760	k__Bacteria; p__Firmicutes; c__Clostridia; o__Clostridiales; f__Ruminococcaceae; g__; s__	0.002 ± 0.001	0 ± 0	0.023976	x
309391	k__Bacteria; p__Firmicutes; c__Clostridia; o__Clostridiales; f__; g__; s__	0.003 ± 0.001	0 ± 0	0.023976	x
577710	k__Bacteria; p__Firmicutes; c__Clostridia; o__Clostridiales; f__Lachnospiraceae; g__Blautia; s__producta	0.001 ± 0.001	0.019 ± 0.013	0.023976	x
187882	k__Bacteria; p__Firmicutes; c__Clostridia; o__Clostridiales; f__Ruminococcaceae; g__; s__	0.019 ± 0.007	0.003 ± 0.002	0.024975	x
198947	k__Bacteria; p__Firmicutes; c__Clostridia; o__Clostridiales; f__Ruminococcaceae; g__; s__	0.005 ± 0.002	0.001 ± 0	0.024975	x
207994	k__Bacteria; p__Firmicutes; c__Clostridia; o__Clostridiales; f__Ruminococcaceae; g__Ruminococcus; s__	0.068 ± 0.029	0.004 ± 0.002	0.024975	x
2617854	k__Bacteria; p__Bacteroidetes; c__Bacteroidia; o__Bacteroidales; f__Rikenellaceae; g__; s__	0 ± 0	0.003 ± 0.002	0.024975	x
4342104	k__Bacteria; p__Firmicutes; c__Clostridia; o__Clostridiales; f__Ruminococcaceae; g__Anaerotruncus; s__	0.052 ± 0.026	0.005 ± 0.002	0.024975	x
4419650	k__Bacteria; p__Firmicutes; c__Clostridia; o__Clostridiales; f__Lachnospiraceae; g__Coprococcus; s__	0.005 ± 0.002	0 ± 0	0.024975	x
181882	k__Bacteria; p__Firmicutes; c__Clostridia; o__Clostridiales; f__Ruminococcaceae; g__; s__	0.001 ± 0.001	0 ± 0	0.0253797	x
185203	k__Bacteria; p__Firmicutes; c__Clostridia; o__Clostridiales; f__Ruminococcaceae; g__; s__	0.001 ± 0.001	0 ± 0	0.0253797	x
188574	k__Bacteria; p__Firmicutes; c__Clostridia; o__Clostridiales; f__; g__; s__	0.001 ± 0.001	0 ± 0	0.0253797	x
192127	k__Bacteria; p__Firmicutes; c__Clostridia; o__Clostridiales; f__Lachnospiraceae; g__; s__	0.001 ± 0.001	0 ± 0	0.0253797	x
198915	k__Bacteria; p__Firmicutes; c__Clostridia; o__Clostridiales; f__Lachnospiraceae; g__Blautia; s__	0.001 ± 0.001	0 ± 0	0.0253797	x
272213	k__Bacteria; p__Firmicutes; c__Clostridia; o__Clostridiales; f__Ruminococcaceae; g__; s__	0.001 ± 0.001	0 ± 0	0.0253797	x
314433	k__Bacteria; p__Firmicutes; c__Clostridia; o__Clostridiales; f__Ruminococcaceae; g__; s__	0.001 ± 0.001	0 ± 0	0.0253797	x
340025	k__Bacteria; p__Firmicutes; c__Clostridia; o__Clostridiales; f__Lachnospiraceae; g__Dorea; s__	0.001 ± 0.001	0 ± 0	0.0253797	x
351357	k__Bacteria; p__Firmicutes; c__Clostridia; o__Clostridiales; f__Clostridiaceae; g__; s__	0.001 ± 0.001	0 ± 0	0.0253797	x
364289	k__Bacteria; p__Firmicutes; c__Clostridia; o__Clostridiales; f__Peptococcaceae; g__rc4-4; s__	0.001 ± 0.001	0 ± 0	0.0253797	x
2313540	k__Bacteria; p__Firmicutes; c__Clostridia; o__Clostridiales; f__Lachnospiraceae; g__Lachnospira; s__	0.001 ± 0.001	0 ± 0	0.0253797	x
2365946	k__Bacteria; p__Firmicutes; c__Clostridia; o__Clostridiales; f__Lachnospiraceae; g__; s__	0.001 ± 0.001	0 ± 0	0.0253797	x
4144205	k__Bacteria; p__Firmicutes; c__Clostridia; o__Clostridiales; f__Lachnospiraceae; g__; s__	0.001 ± 0.001	0 ± 0	0.0253797	x
4446669	k__Bacteria; p__Firmicutes; c__Clostridia; o__Clostridiales; f__Ruminococcaceae; g__; s__	0.001 ± 0.001	0 ± 0	0.0253797	x
198990	k__Bacteria; p__Firmicutes; c__Clostridia; o__Clostridiales; f__Lachnospiraceae; g__Blautia; s__	0.007 ± 0.002	0.014 ± 0.002	0.025974	x
360553	k__Bacteria; p__Firmicutes; c__Clostridia; o__Clostridiales; f__Lachnospiraceae; g__; s__	0 ± 0	0.006 ± 0.003	0.025974	x
180045	k__Bacteria; p__Bacteroidetes; c__Bacteroidia; o__Bacteroidales; f__Bacteroidaceae; g__Bacteroides; s__	0.002 ± 0.001	0 ± 0	0.0265908	x
189459	k__Bacteria; p__Firmicutes; c__Clostridia; o__Clostridiales; f__Lachnospiraceae; g__Coprococcus; s__	0.002 ± 0.001	0 ± 0	0.0265908	x
195207	k__Bacteria; p__Firmicutes; c__Clostridia; o__Clostridiales; f__Lachnospiraceae; g__Roseburia; s__	0.002 ± 0.001	0 ± 0	0.0265908	x
3134492	k__Bacteria; p__Firmicutes; c__Clostridia; o__Clostridiales; f__Lachnospiraceae; g__; s__	0.002 ± 0.001	0 ± 0	0.0265908	x
4405482	k__Bacteria; p__Firmicutes; c__Clostridia; o__Clostridiales; f__Lachnospiraceae; g__; s__	0.002 ± 0.001	0 ± 0	0.0265908	x
4446898	k__Bacteria; p__Bacteroidetes; c__Bacteroidia; o__Bacteroidales; f__Bacteroidaceae; g__Bacteroides; s__	0.002 ± 0.001	0 ± 0	0.0265908	x
177740	k__Bacteria; p__Firmicutes; c__Clostridia; o__Clostridiales; f__Lachnospiraceae; g__Blautia; s__producta	0.003 ± 0.001	0.037 ± 0.021	0.026973	x
179534	k__Bacteria; p__Firmicutes; c__Clostridia; o__Clostridiales; f__Lachnospiraceae; g__Blautia; s__	0.003 ± 0.001	0.009 ± 0.002	0.026973	x
182157	k__Bacteria; p__Bacteroidetes; c__Bacteroidia; o__Bacteroidales; f__Bacteroidaceae; g__Bacteroides; s__	0.114 ± 0.085	0 ± 0	0.027972	x
358858	k__Bacteria; p__Firmicutes; c__Clostridia; o__Clostridiales; f__Lachnospiraceae; g__; s__	0.001 ± 0.001	0.004 ± 0.001	0.027972	x
2018038	k__Bacteria; p__Firmicutes; c__Clostridia; o__Clostridiales; f__Ruminococcaceae; g__; s__	0.006 ± 0.003	0 ± 0	0.027972	x
189053	k__Bacteria; p__Firmicutes; c__Clostridia; o__Clostridiales; f__Lachnospiraceae; g__Blautia; s__	0 ± 0	0.002 ± 0.001	0.0288341	x
191050	k__Bacteria; p__Firmicutes; c__Clostridia; o__Clostridiales; f__Lachnospiraceae; g__[Ruminococcus]; s__	0 ± 0	0.002 ± 0.001	0.0288341	x
586453	k__Bacteria; p__Firmicutes; c__Clostridia; o__Clostridiales; f__Christensenellaceae; g__; s__	0 ± 0	0.002 ± 0.001	0.0288341	x
4454043	k__Bacteria; p__Firmicutes; c__Clostridia; o__Clostridiales; f__Lachnospiraceae; g__Epulopiscium; s__	0 ± 0	0.002 ± 0.001	0.0288341	x
175508	k__Bacteria; p__Actinobacteria; c__Coriobacteriia; o__Coriobacteriales; f__Coriobacteriaceae; g__; s__	0 ± 0	0.012 ± 0.006	0.028971	x
194889	k__Bacteria; p__Firmicutes; c__Clostridia; o__Clostridiales; f__Lachnospiraceae; g__; s__	0 ± 0	0.004 ± 0.002	0.028971	x
216010	k__Bacteria; p__Firmicutes; c__Clostridia; o__Clostridiales; f__[Mogibacteriaceae]; g__; s__	0.002 ± 0.002	0.013 ± 0.005	0.028971	x
174629	k__Bacteria; p__Firmicutes; c__Clostridia; o__Clostridiales; f__Lachnospiraceae; g__Coprococcus; s__	0 ± 0	0.002 ± 0.001	0.0296799	x
192708	k__Bacteria; p__Firmicutes; c__Clostridia; o__Clostridiales; f__Lachnospiraceae; g__; s__	0 ± 0	0.002 ± 0.001	0.0296799	x
290211	k__Bacteria; p__Firmicutes; c__Clostridia; o__Clostridiales; f__Clostridiaceae; g__; s__	0 ± 0	0.002 ± 0.001	0.0296799	x
674696	k__Bacteria; p__Proteobacteria; c__Gammaproteobacteria; o__Enterobacteriales; f__Enterobacteriaceae; g__Citrobacter; s__	0 ± 0	0.002 ± 0.002	0.0296799	x
749837	k__Bacteria; p__Firmicutes; c__Clostridia; o__Clostridiales; f__Lachnospiraceae; g__Oribacterium; s__	0 ± 0	0.002 ± 0.001	0.0296799	x
176507	k__Bacteria; p__Firmicutes; c__Clostridia; o__Clostridiales; f__Ruminococcaceae; g__; s__	0.009 ± 0.004	0.001 ± 0.001	0.02997	x
177305	k__Bacteria; p__Firmicutes; c__Clostridia; o__Clostridiales; f__; g__; s__	0.024 ± 0.012	0.105 ± 0.031	0.02997	x
177695	k__Bacteria; p__Firmicutes; c__Clostridia; o__Clostridiales; f__Ruminococcaceae; g__; s__	0.005 ± 0.002	0 ± 0	0.02997	x
178142	k__Bacteria; p__Firmicutes; c__Clostridia; o__Clostridiales; f__; g__; s__	0.069 ± 0.03	0.224 ± 0.062	0.02997	x
191872	k__Bacteria; p__Firmicutes; c__Clostridia; o__Clostridiales; f__Ruminococcaceae; g__; s__	0.007 ± 0.003	0.001 ± 0.001	0.02997	x
4372382	k__Bacteria; p__Firmicutes; c__Clostridia; o__Clostridiales; f__Lachnospiraceae; g__; s__	0 ± 0	0.084 ± 0.046	0.02997	x
192048	k__Bacteria; p__Firmicutes; c__Clostridia; o__Clostridiales; f__Ruminococcaceae; g__Faecalibacterium; s__prausnitzii	0.003 ± 0.001	0 ± 0	0.030969	x
1630017	k__Bacteria; p__Firmicutes; c__Clostridia; o__Clostridiales; f__Lachnospiraceae; g__; s__	0.018 ± 0.01	0 ± 0	0.030969	x
4393962	k__Bacteria; p__TM7; c__TM7-3; o__; f__; g__; s__	0.003 ± 0.001	0.012 ± 0.004	0.030969	x
179473	k__Bacteria; p__Firmicutes; c__Clostridia; o__Clostridiales; f__Lachnospiraceae; g__Blautia; s__	0.02 ± 0.008	0.062 ± 0.018	0.032967	x
180190	k__Bacteria; p__Firmicutes; c__Clostridia; o__Clostridiales; f__Lachnospiraceae; g__Blautia; s__	0.011 ± 0.008	0 ± 0	0.032967	x
184339	k__Bacteria; p__Firmicutes; c__Clostridia; o__Clostridiales; f__Ruminococcaceae; g__; s__	0.004 ± 0.002	0 ± 0	0.032967	x
3609545	k__Bacteria; p__Firmicutes; c__Clostridia; o__Clostridiales; f__; g__; s__	0.065 ± 0.03	0.202 ± 0.05	0.032967	x
183157	k__Bacteria; p__Firmicutes; c__Clostridia; o__Clostridiales; f__Ruminococcaceae; g__Faecalibacterium; s__prausnitzii	0.067 ± 0.028	0.007 ± 0.004	0.033966	x
183783	k__Bacteria; p__Firmicutes; c__Clostridia; o__Clostridiales; f__Clostridiaceae; g__02d06; s__	0 ± 0	0.004 ± 0.002	0.033966	x
179686	k__Bacteria; p__Firmicutes; c__Clostridia; o__Clostridiales; f__Ruminococcaceae; g__Faecalibacterium; s__prausnitzii	0.016 ± 0.007	0.003 ± 0.001	0.034965	x
197830	k__Bacteria; p__Firmicutes; c__Clostridia; o__Clostridiales; f__; g__; s__	0.001 ± 0.001	0.01 ± 0.004	0.034965	x
181204	k__Bacteria; p__Firmicutes; c__Clostridia; o__Clostridiales; f__Ruminococcaceae; g__; s__	0.009 ± 0.005	0 ± 0	0.035964	x
2415144	k__Bacteria; p__Bacteroidetes; c__Bacteroidia; o__Bacteroidales; f__Bacteroidaceae; g__Bacteroides; s__	0.027 ± 0.023	0 ± 0	0.035964	x
174943	k__Bacteria; p__Firmicutes; c__Clostridia; o__Clostridiales; f__Ruminococcaceae; g__; s__	0.003 ± 0.002	0 ± 0	0.036963	x
190335	k__Bacteria; p__Firmicutes; c__Clostridia; o__Clostridiales; f__; g__; s__	0.002 ± 0.001	0 ± 0	0.036963	x
332210	k__Bacteria; p__Firmicutes; c__Clostridia; o__Clostridiales; f__Lachnospiraceae; g__; s__	0 ± 0	0.002 ± 0.001	0.036963	x
13811	k__Bacteria; p__Firmicutes; c__Clostridia; o__Clostridiales; f__Veillonellaceae; g__Mitsuokella; s__multacida	0.001 ± 0.001	0 ± 0	0.0374807	x
40798	k__Bacteria; p__Firmicutes; c__Clostridia; o__Clostridiales; f__Ruminococcaceae; g__; s__	0.001 ± 0.001	0 ± 0	0.0374807	x
45296	k__Bacteria; p__Firmicutes; c__Clostridia; o__Clostridiales; f__Lachnospiraceae; g__; s__	0.001 ± 0.001	0 ± 0	0.0374807	x
130773	k__Bacteria; p__Firmicutes; c__Clostridia; o__Clostridiales; f__Lachnospiraceae; g__[Ruminococcus]; s__	0.001 ± 0.001	0 ± 0	0.0374807	x
176703	k__Bacteria; p__Firmicutes; c__Clostridia; o__Clostridiales; f__Lachnospiraceae; g__; s__	0.001 ± 0.001	0 ± 0	0.0374807	x
177520	k__Bacteria; p__Firmicutes; c__Clostridia; o__Clostridiales; f__Lachnospiraceae; g__Roseburia; s__faecis	0.001 ± 0.001	0 ± 0	0.0374807	x
177986	k__Bacteria; p__Firmicutes; c__Clostridia; o__Clostridiales; f__Lachnospiraceae; g__; s__	0.001 ± 0.001	0 ± 0	0.0374807	x
178064	k__Bacteria; p__Bacteroidetes; c__Bacteroidia; o__Bacteroidales; f__Bacteroidaceae; g__Bacteroides; s__	0.001 ± 0.001	0 ± 0	0.0374807	x
178810	k__Bacteria; p__Bacteroidetes; c__Bacteroidia; o__Bacteroidales; f__Bacteroidaceae; g__Bacteroides; s__	0.001 ± 0.001	0 ± 0	0.0374807	x
179354	k__Bacteria; p__Firmicutes; c__Clostridia; o__Clostridiales; f__Ruminococcaceae; g__Oscillospira; s__	0.001 ± 0.001	0 ± 0	0.0374807	x
179390	k__Bacteria; p__Firmicutes; c__Clostridia; o__Clostridiales; f__; g__; s__	0.001 ± 0.001	0 ± 0	0.0374807	x
179551	k__Bacteria; p__Firmicutes; c__Clostridia; o__Clostridiales; f__Lachnospiraceae; g__Lachnobacterium; s__	0.001 ± 0.001	0 ± 0	0.0374807	x
180982	k__Bacteria; p__Firmicutes; c__Clostridia; o__Clostridiales; f__Ruminococcaceae; g__; s__	0.001 ± 0.001	0 ± 0	0.0374807	x
182033	k__Bacteria; p__Firmicutes; c__Clostridia; o__Clostridiales; f__Ruminococcaceae; g__Oscillospira; s__	0.001 ± 0.001	0 ± 0	0.0374807	x
182933	k__Bacteria; p__Firmicutes; c__Clostridia; o__Clostridiales; f__Lachnospiraceae; g__Blautia; s__	0.001 ± 0	0 ± 0	0.0374807	x
184214	k__Bacteria; p__Firmicutes; c__Clostridia; o__Clostridiales; f__Ruminococcaceae; g__; s__	0.001 ± 0.001	0 ± 0	0.0374807	x
185486	k__Bacteria; p__Firmicutes; c__Clostridia; o__Clostridiales; f__Lachnospiraceae; g__; s__	0.001 ± 0.001	0 ± 0	0.0374807	x
185883	k__Bacteria; p__Firmicutes; c__Clostridia; o__Clostridiales; f__Lachnospiraceae; g__Blautia; s__	0.001 ± 0.001	0 ± 0	0.0374807	x
191716	k__Bacteria; p__Firmicutes; c__Clostridia; o__Clostridiales; f__; g__; s__	0.001 ± 0.001	0 ± 0	0.0374807	x
193534	k__Bacteria; p__Bacteroidetes; c__Bacteroidia; o__Bacteroidales; f__Bacteroidaceae; g__Bacteroides; s__	0.001 ± 0.001	0 ± 0	0.0374807	x
193833	k__Bacteria; p__Firmicutes; c__Clostridia; o__Clostridiales; f__Lachnospiraceae; g__; s__	0.001 ± 0.001	0 ± 0	0.0374807	x
194443	k__Bacteria; p__Firmicutes; c__Clostridia; o__Clostridiales; f__Ruminococcaceae; g__; s__	0.001 ± 0.001	0 ± 0	0.0374807	x
194933	k__Bacteria; p__Firmicutes; c__Clostridia; o__Clostridiales; f__Ruminococcaceae; g__Faecalibacterium; s__prausnitzii	0.001 ± 0	0 ± 0	0.0374807	x
197274	k__Bacteria; p__Firmicutes; c__Clostridia; o__Clostridiales; f__; g__; s__	0.001 ± 0.001	0 ± 0	0.0374807	x
197499	k__Bacteria; p__Firmicutes; c__Clostridia; o__Clostridiales; f__Ruminococcaceae; g__; s__	0.001 ± 0.001	0 ± 0	0.0374807	x
197929	k__Bacteria; p__Firmicutes; c__Clostridia; o__Clostridiales; f__Ruminococcaceae; g__; s__	0.001 ± 0.001	0 ± 0	0.0374807	x
199145	k__Bacteria; p__Firmicutes; c__Clostridia; o__Clostridiales; f__Ruminococcaceae; g__Faecalibacterium; s__prausnitzii	0.001 ± 0.001	0 ± 0	0.0374807	x
199212	k__Bacteria; p__Firmicutes; c__Clostridia; o__Clostridiales; f__; g__; s__	0.001 ± 0	0 ± 0	0.0374807	x
201772	k__Bacteria; p__Firmicutes; c__Clostridia; o__Clostridiales; f__; g__; s__	0.001 ± 0	0 ± 0	0.0374807	x
205765	k__Bacteria; p__Firmicutes; c__Clostridia; o__Clostridiales; f__Ruminococcaceae; g__; s__	0.001 ± 0.001	0 ± 0	0.0374807	x
215040	k__Bacteria; p__Firmicutes; c__Clostridia; o__Clostridiales; f__Veillonellaceae; g__Dialister; s__	0.001 ± 0.001	0 ± 0	0.0374807	x
234724	k__Bacteria; p__Firmicutes; c__Clostridia; o__Clostridiales; f__Ruminococcaceae; g__; s__	0.001 ± 0.001	0 ± 0	0.0374807	x
261799	k__Bacteria; p__Firmicutes; c__Clostridia; o__Clostridiales; f__Ruminococcaceae; g__; s__	0.001 ± 0.001	0 ± 0	0.0374807	x
291950	k__Bacteria; p__Firmicutes; c__Clostridia; o__Clostridiales; f__Lachnospiraceae; g__; s__	0.001 ± 0	0 ± 0	0.0374807	x
292041	k__Bacteria; p__Bacteroidetes; c__Bacteroidia; o__Bacteroidales; f__Prevotellaceae; g__Prevotella; s__copri	0.001 ± 0.001	0 ± 0	0.0374807	x
296470	k__Bacteria; p__Bacteroidetes; c__Bacteroidia; o__Bacteroidales; f__Bacteroidaceae; g__Bacteroides; s__	0.001 ± 0.001	0 ± 0	0.0374807	x
299355	k__Bacteria; p__Firmicutes; c__Clostridia; o__Clostridiales; f__Lachnospiraceae; g__; s__	0.001 ± 0.001	0 ± 0	0.0374807	x
301578	k__Bacteria; p__Bacteroidetes; c__Bacteroidia; o__Bacteroidales; f__Bacteroidaceae; g__Bacteroides; s__	0.001 ± 0.001	0 ± 0	0.0374807	x
306315	k__Bacteria; p__Firmicutes; c__Clostridia; o__Clostridiales; f__Ruminococcaceae; g__Oscillospira; s__	0.001 ± 0.001	0 ± 0	0.0374807	x
307903	k__Bacteria; p__Firmicutes; c__Clostridia; o__Clostridiales; f__Lachnospiraceae; g__[Ruminococcus]; s__gnavus	0.001 ± 0	0 ± 0	0.0374807	x
319165	k__Bacteria; p__Firmicutes; c__Clostridia; o__Clostridiales; f__; g__; s__	0.001 ± 0.001	0 ± 0	0.0374807	x
322087	k__Bacteria; p__Firmicutes; c__Clostridia; o__Clostridiales; f__Lachnospiraceae; g__Blautia; s__	0.001 ± 0.001	0 ± 0	0.0374807	x
348027	k__Bacteria; p__Bacteroidetes; c__Bacteroidia; o__Bacteroidales; f__Bacteroidaceae; g__Bacteroides; s__uniformis	0.001 ± 0.001	0 ± 0	0.0374807	x
351231	k__Bacteria; p__Bacteroidetes; c__Bacteroidia; o__Bacteroidales; f__Bacteroidaceae; g__Bacteroides; s__fragilis	0.001 ± 0.001	0 ± 0	0.0374807	x
364926	k__Bacteria; p__Bacteroidetes; c__Bacteroidia; o__Bacteroidales; f__Bacteroidaceae; g__Bacteroides; s__	0.001 ± 0.001	0 ± 0	0.0374807	x
562038	k__Bacteria; p__Firmicutes; c__Clostridia; o__Clostridiales; f__Lachnospiraceae; g__; s__	0.001 ± 0.001	0 ± 0	0.0374807	x
574102	k__Bacteria; p__Proteobacteria; c__Gammaproteobacteria; o__Pseudomonadales; f__Moraxellaceae; g__Enhydrobacter; s__	0.001 ± 0	0 ± 0	0.0374807	x
656881	k__Bacteria; p__Proteobacteria; c__Gammaproteobacteria; o__Enterobacteriales; f__Enterobacteriaceae; g__; s__	0.001 ± 0.001	0 ± 0	0.0374807	x
691423	k__Bacteria; p__Proteobacteria; c__Gammaproteobacteria; o__Enterobacteriales; f__Enterobacteriaceae; g__; s__	0.001 ± 0.001	0 ± 0	0.0374807	x
2237211	k__Bacteria; p__Bacteroidetes; c__Bacteroidia; o__Bacteroidales; f__Bacteroidaceae; g__Bacteroides; s__	0.001 ± 0.001	0 ± 0	0.0374807	x
2487345	k__Bacteria; p__Firmicutes; c__Clostridia; o__Clostridiales; f__Lachnospiraceae; g__; s__	0.001 ± 0	0 ± 0	0.0374807	x
2686590	k__Bacteria; p__Firmicutes; c__Clostridia; o__Clostridiales; f__Lachnospiraceae; g__[Ruminococcus]; s__	0.001 ± 0.001	0 ± 0	0.0374807	x
2712937	k__Bacteria; p__Firmicutes; c__Clostridia; o__Clostridiales; f__; g__; s__	0.001 ± 0	0 ± 0	0.0374807	x
2771073	k__Bacteria; p__Firmicutes; c__Clostridia; o__Clostridiales; f__Lachnospiraceae; g__; s__	0.001 ± 0	0 ± 0	0.0374807	x
2920309	k__Bacteria; p__Bacteroidetes; c__Bacteroidia; o__Bacteroidales; f__Bacteroidaceae; g__Bacteroides; s__	0.001 ± 0.001	0 ± 0	0.0374807	x
3236435	k__Bacteria; p__Firmicutes; c__Clostridia; o__Clostridiales; f__Ruminococcaceae; g__; s__	0.001 ± 0.001	0 ± 0	0.0374807	x
3693042	k__Bacteria; p__Firmicutes; c__Clostridia; o__Clostridiales; f__Lachnospiraceae; g__; s__	0.001 ± 0.001	0 ± 0	0.0374807	x
4377328	k__Bacteria; p__Firmicutes; c__Clostridia; o__Clostridiales; f__Lachnospiraceae; g__; s__	0.001 ± 0.001	0 ± 0	0.0374807	x
4393073	k__Bacteria; p__Firmicutes; c__Clostridia; o__Clostridiales; f__Lachnospiraceae; g__; s__	0.001 ± 0	0 ± 0	0.0374807	x
4405423	k__Bacteria; p__Firmicutes; c__Clostridia; o__Clostridiales; f__; g__; s__	0.001 ± 0.001	0 ± 0	0.0374807	x
4417708	k__Bacteria; p__Firmicutes; c__Clostridia; o__Clostridiales; f__; g__; s__	0.001 ± 0.001	0 ± 0	0.0374807	x
4421995	k__Bacteria; p__Firmicutes; c__Clostridia; o__Clostridiales; f__; g__; s__	0.001 ± 0.001	0 ± 0	0.0374807	x
4452107	k__Bacteria; p__Firmicutes; c__Clostridia; o__Clostridiales; f__Lachnospiraceae; g__; s__	0.001 ± 0.001	0 ± 0	0.0374807	x
4453609	k__Bacteria; p__Bacteroidetes; c__Bacteroidia; o__Bacteroidales; f__Rikenellaceae; g__; s__	0.001 ± 0.001	0 ± 0	0.0374807	x
4456027	k__Bacteria; p__Firmicutes; c__Clostridia; o__Clostridiales; f__Lachnospiraceae; g__; s__	0.001 ± 0.001	0 ± 0	0.0374807	x
4466618	k__Bacteria; p__Proteobacteria; c__Gammaproteobacteria; o__Enterobacteriales; f__Enterobacteriaceae; g__Erwinia; s__	0.001 ± 0.001	0 ± 0	0.0374807	x
48084	k__Bacteria; p__Firmicutes; c__Clostridia; o__Clostridiales; f__Ruminococcaceae; g__; s__	0.02 ± 0.007	0.004 ± 0.003	0.037962	x
181056	k__Bacteria; p__Firmicutes; c__Clostridia; o__Clostridiales; f__Ruminococcaceae; g__Faecalibacterium; s__prausnitzii	0.322 ± 0.133	0.043 ± 0.018	0.037962	x
181759	k__Bacteria; p__Firmicutes; c__Clostridia; o__Clostridiales; f__Ruminococcaceae; g__; s__	0.126 ± 0.052	0.016 ± 0.006	0.037962	x
183121	k__Bacteria; p__Firmicutes; c__Clostridia; o__Clostridiales; f__Lachnospiraceae; g__[Ruminococcus]; s__	0.002 ± 0.001	0.015 ± 0.008	0.037962	x
185558	k__Bacteria; p__Firmicutes; c__Clostridia; o__Clostridiales; f__; g__; s__	0 ± 0	0.001 ± 0.001	0.0380968	x
189812	k__Bacteria; p__Firmicutes; c__Erysipelotrichi; o__Erysipelotrichales; f__Erysipelotrichaceae; g__[Eubacterium]; s__biforme	0 ± 0	0.001 ± 0.001	0.0380968	x
189860	k__Bacteria; p__Firmicutes; c__Clostridia; o__Clostridiales; f__Lachnospiraceae; g__; s__	0 ± 0	0.001 ± 0.001	0.0380968	x
241441	k__Bacteria; p__Proteobacteria; c__Alphaproteobacteria; o__Rhizobiales; f__Rhizobiaceae; g__Agrobacterium; s__	0 ± 0	0.001 ± 0.001	0.0380968	x
261698	k__Bacteria; p__Firmicutes; c__Clostridia; o__Clostridiales; f__Lachnospiraceae; g__Roseburia; s__	0 ± 0	0.001 ± 0	0.0380968	x
320123	k__Bacteria; p__Bacteroidetes; c__Bacteroidia; o__Bacteroidales; f__S24-7; g__; s__	0 ± 0	0.001 ± 0	0.0380968	x
345575	k__Bacteria; p__Firmicutes; c__Bacilli; o__Lactobacillales; f__Streptococcaceae; g__Lactococcus; s__	0 ± 0	0.001 ± 0.001	0.0380968	x
354283	k__Bacteria; p__Firmicutes; c__Clostridia; o__Clostridiales; f__; g__; s__	0 ± 0	0.001 ± 0.001	0.0380968	x
513080	k__Bacteria; p__Firmicutes; c__Bacilli; o__Lactobacillales; f__Streptococcaceae; g__Lactococcus; s__	0 ± 0	0.001 ± 0.001	0.0380968	x
688701	k__Bacteria; p__Firmicutes; c__Clostridia; o__Clostridiales; f__Lachnospiraceae; g__; s__	0 ± 0	0.001 ± 0.001	0.0380968	x
842413	k__Bacteria; p__Firmicutes; c__Bacilli; o__Lactobacillales; f__Leuconostocaceae; g__Leuconostoc; s__	0 ± 0	0.001 ± 0.001	0.0380968	x
955102	k__Bacteria; p__Actinobacteria; c__Actinobacteria; o__Actinomycetales; f__Actinomycetaceae; g__Actinomyces; s__	0 ± 0	0.001 ± 0.001	0.0380968	x
1066410	k__Bacteria; p__Actinobacteria; c__Actinobacteria; o__Actinomycetales; f__Actinomycetaceae; g__Actinomyces; s__	0 ± 0	0.001 ± 0.001	0.0380968	x
1111782	k__Bacteria; p__Firmicutes; c__Clostridia; o__Clostridiales; f__Ruminococcaceae; g__; s__	0 ± 0	0.001 ± 0.001	0.0380968	x
1754506	k__Bacteria; p__Proteobacteria; c__Gammaproteobacteria; o__Cardiobacteriales; f__Cardiobacteriaceae; g__Cardiobacterium; s__	0 ± 0	0.001 ± 0.001	0.0380968	x
2686369	k__Bacteria; p__Firmicutes; c__Clostridia; o__Clostridiales; f__Lachnospiraceae; g__[Ruminococcus]; s__	0 ± 0	0.001 ± 0.001	0.0380968	x
4300690	k__Bacteria; p__Firmicutes; c__Clostridia; o__Clostridiales; f__Ruminococcaceae; g__; s__	0 ± 0	0.001 ± 0.001	0.0380968	x
4309301	k__Bacteria; p__Firmicutes; c__Bacilli; o__Lactobacillales; f__Streptococcaceae; g__Streptococcus; s__	0 ± 0	0.001 ± 0.001	0.0380968	x
4326869	k__Bacteria; p__Firmicutes; c__Clostridia; o__Clostridiales; f__Ruminococcaceae; g__Ruminococcus; s__	0 ± 0	0.001 ± 0.001	0.0380968	x
4411875	k__Bacteria; p__Actinobacteria; c__Actinobacteria; o__Bifidobacteriales; f__Bifidobacteriaceae; g__Scardovia; s__	0 ± 0	0.001 ± 0.001	0.0380968	x
4419310	k__Bacteria; p__Proteobacteria; c__Alphaproteobacteria; o__Rhizobiales; f__Xanthobacteraceae; g__; s__	0 ± 0	0.001 ± 0.001	0.0380968	x
4447394	k__Bacteria; p__Actinobacteria; c__Actinobacteria; o__Actinomycetales; f__Propionibacteriaceae; g__Propionibacterium; s__acnes	0 ± 0	0.001 ± 0.001	0.0380968	x
4461127	k__Bacteria; p__Firmicutes; c__Clostridia; o__Clostridiales; f__Lachnospiraceae; g__[Ruminococcus]; s__	0 ± 0	0.001 ± 0.001	0.0380968	x
4466006	k__Bacteria; p__Actinobacteria; c__Actinobacteria; o__Actinomycetales; f__Micrococcaceae; g__Rothia; s__dentocariosa	0 ± 0	0.001 ± 0.001	0.0380968	x
173135	k__Bacteria; p__Firmicutes; c__Clostridia; o__Clostridiales; f__Ruminococcaceae; g__Faecalibacterium; s__prausnitzii	0.006 ± 0.002	0.002 ± 0.001	0.038961	x
175264	k__Bacteria; p__Firmicutes; c__Clostridia; o__Clostridiales; f__Lachnospiraceae; g__[Ruminococcus]; s__	0.009 ± 0.008	0.133 ± 0.059	0.038961	x
194586	k__Bacteria; p__Firmicutes; c__Clostridia; o__Clostridiales; f__Lachnospiraceae; g__Blautia; s__	0.003 ± 0.001	0.008 ± 0.002	0.038961	x
4391230	k__Bacteria; p__Firmicutes; c__Clostridia; o__Clostridiales; f__Veillonellaceae; g__Veillonella; s__dispar	0.254 ± 0.18	0.009 ± 0.003	0.038961	x
193279	k__Bacteria; p__Actinobacteria; c__Coriobacteriia; o__Coriobacteriales; f__Coriobacteriaceae; g__Adlercreutzia; s__	0.001 ± 0.001	0.022 ± 0.009	0.03996	x
174288	k__Bacteria; p__Firmicutes; c__Clostridia; o__Clostridiales; f__Ruminococcaceae; g__; s__	0.002 ± 0.002	0 ± 0	0.0402858	x
189110	k__Bacteria; p__Firmicutes; c__Clostridia; o__Clostridiales; f__Ruminococcaceae; g__Ruminococcus; s__	0.002 ± 0.001	0 ± 0	0.0402858	x
196982	k__Bacteria; p__Firmicutes; c__Clostridia; o__Clostridiales; f__Ruminococcaceae; g__; s__	0.002 ± 0.001	0 ± 0	0.0402858	x
2529278	k__Bacteria; p__Proteobacteria; c__Gammaproteobacteria; o__Enterobacteriales; f__Enterobacteriaceae; g__; s__	0.002 ± 0.001	0 ± 0	0.0402858	x
4466275	k__Bacteria; p__Firmicutes; c__Clostridia; o__Clostridiales; f__Ruminococcaceae; g__; s__	0.002 ± 0.001	0 ± 0	0.0402858	x
194036	k__Bacteria; p__Firmicutes; c__Clostridia; o__Clostridiales; f__Ruminococcaceae; g__; s__	0 ± 0	0.002 ± 0.001	0.040959	x
355197	k__Bacteria; p__Firmicutes; c__Clostridia; o__Clostridiales; f__; g__; s__	0.006 ± 0.002	0.001 ± 0.001	0.040959	x
177037	k__Bacteria; p__Firmicutes; c__Clostridia; o__Clostridiales; f__Lachnospiraceae; g__Blautia; s__	0.005 ± 0.002	0.024 ± 0.008	0.041958	x
348863	k__Bacteria; p__Firmicutes; c__Clostridia; o__Clostridiales; f__Lachnospiraceae; g__; s__	0.016 ± 0.009	0 ± 0	0.041958	x
4451251	k__Bacteria; p__Actinobacteria; c__Coriobacteriia; o__Coriobacteriales; f__Coriobacteriaceae; g__Atopobium; s__	0 ± 0	0.006 ± 0.004	0.041958	x
179847	k__Bacteria; p__Firmicutes; c__Clostridia; o__Clostridiales; f__Lachnospiraceae; g__; s__	0.001 ± 0	0.004 ± 0.002	0.042957	x
180182	k__Bacteria; p__Firmicutes; c__Clostridia; o__Clostridiales; f__Ruminococcaceae; g__; s__	0.004 ± 0.002	0.001 ± 0.001	0.042957	x
192210	k__Bacteria; p__Firmicutes; c__Clostridia; o__Clostridiales; f__; g__; s__	0.003 ± 0.001	0 ± 0	0.042957	x
308333	k__Bacteria; p__Firmicutes; c__Clostridia; o__Clostridiales; f__Ruminococcaceae; g__Faecalibacterium; s__prausnitzii	0.021 ± 0.006	0.007 ± 0.003	0.042957	x
3924627	k__Bacteria; p__Firmicutes; c__Clostridia; o__Clostridiales; f__Lachnospiraceae; g__; s__	0.008 ± 0.005	0 ± 0	0.042957	x
4370229	k__Bacteria; p__Firmicutes; c__Clostridia; o__Clostridiales; f__Clostridiaceae; g__; s__	0 ± 0	0.004 ± 0.002	0.042957	x
348237	k__Bacteria; p__Firmicutes; c__Clostridia; o__Clostridiales; f__; g__; s__	0.004 ± 0.002	0 ± 0	0.043956	x
4373305	k__Bacteria; p__Firmicutes; c__Clostridia; o__Clostridiales; f__Ruminococcaceae; g__; s__	0.004 ± 0.003	0 ± 0	0.043956	x
186392	k__Bacteria; p__Firmicutes; c__Clostridia; o__Clostridiales; f__Ruminococcaceae; g__Faecalibacterium; s__prausnitzii	0.003 ± 0.001	0 ± 0	0.044955	x
192774	k__Bacteria; p__Firmicutes; c__Clostridia; o__Clostridiales; f__Lachnospiraceae; g__[Ruminococcus]; s__gnavus	0.003 ± 0.001	0 ± 0	0.044955	x
198489	k__Bacteria; p__Firmicutes; c__Clostridia; o__Clostridiales; f__; g__; s__	0.018 ± 0.011	0 ± 0	0.044955	x
4384203	k__Bacteria; p__Firmicutes; c__Clostridia; o__Clostridiales; f__Lachnospiraceae; g__[Ruminococcus]; s__gnavus	0.01 ± 0.006	0.001 ± 0.001	0.044955	x
4437814	k__Bacteria; p__Bacteroidetes; c__Bacteroidia; o__Bacteroidales; f__Bacteroidaceae; g__Bacteroides; s__	0.058 ± 0.049	0 ± 0	0.044955	x
174672	k__Bacteria; p__Firmicutes; c__Clostridia; o__Clostridiales; f__Lachnospiraceae; g__; s__	0.001 ± 0	0.002 ± 0.001	0.0457357	x
174519	k__Bacteria; p__Firmicutes; c__Clostridia; o__Clostridiales; f__; g__; s__	0.003 ± 0.002	0 ± 0	0.045954	x
175642	k__Bacteria; p__Firmicutes; c__Clostridia; o__Clostridiales; f__Lachnospiraceae; g__; s__	0.001 ± 0.001	0.008 ± 0.003	0.045954	x
178822	k__Bacteria; p__Firmicutes; c__Clostridia; o__Clostridiales; f__Lachnospiraceae; g__; s__	0.002 ± 0.002	0.01 ± 0.003	0.045954	x
196219	k__Bacteria; p__Bacteroidetes; c__Bacteroidia; o__Bacteroidales; f__Porphyromonadaceae; g__Parabacteroides; s__	0.012 ± 0.009	0 ± 0	0.045954	x
4458634	k__Bacteria; p__Firmicutes; c__Clostridia; o__Clostridiales; f__Lachnospiraceae; g__[Ruminococcus]; s__	0.009 ± 0.008	0 ± 0	0.045954	x
188749	k__Bacteria; p__Firmicutes; c__Clostridia; o__Clostridiales; f__; g__; s__	0.006 ± 0.003	0.001 ± 0	0.046953	x
178015	k__Bacteria; p__Firmicutes; c__Clostridia; o__Clostridiales; f__Ruminococcaceae; g__; s__	0.011 ± 0.006	0 ± 0	0.047952	x
180707	k__Bacteria; p__Firmicutes; c__Clostridia; o__Clostridiales; f__Lachnospiraceae; g__[Ruminococcus]; s__	0.002 ± 0.001	0.022 ± 0.01	0.047952	x
193075	k__Bacteria; p__Firmicutes; c__Clostridia; o__Clostridiales; f__; g__; s__	0.004 ± 0.001	0.001 ± 0.001	0.047952	x
195628	k__Bacteria; p__Firmicutes; c__Clostridia; o__Clostridiales; f__Lachnospiraceae; g__Coprococcus; s__	0.008 ± 0.004	0.023 ± 0.006	0.047952	x
199745	k__Bacteria; p__Firmicutes; c__Clostridia; o__Clostridiales; f__Lachnospiraceae; g__Blautia; s__	0.002 ± 0.001	0.004 ± 0.001	0.047952	x
357046	k__Bacteria; p__Bacteroidetes; c__Bacteroidia; o__Bacteroidales; f__Rikenellaceae; g__; s__	0.265 ± 0.097	0.049 ± 0.021	0.047952	x
839684	k__Bacteria; p__Firmicutes; c__Clostridia; o__Clostridiales; f__Lachnospiraceae; g__[Ruminococcus]; s__	0.005 ± 0.003	0 ± 0	0.047952	x
183469	k__Bacteria; p__Firmicutes; c__Clostridia; o__Clostridiales; f__Ruminococcaceae; g__; s__	0 ± 0	0.002 ± 0.001	0.0486148	x
187490	k__Bacteria; p__Actinobacteria; c__Coriobacteriia; o__Coriobacteriales; f__Coriobacteriaceae; g__Collinsella; s__	0 ± 0	0.002 ± 0.001	0.0486148	x
193572	k__Bacteria; p__Firmicutes; c__Clostridia; o__Clostridiales; f__Ruminococcaceae; g__; s__	0 ± 0	0.002 ± 0.001	0.0486148	x
2582660	k__Bacteria; p__Firmicutes; c__Clostridia; o__Clostridiales; f__Lachnospiraceae; g__Blautia; s__	0 ± 0	0.002 ± 0.001	0.0486148	x
4347652	k__Bacteria; p__Firmicutes; c__Clostridia; o__Clostridiales; f__Lachnospiraceae; g__Blautia; s__	0 ± 0	0.002 ± 0.001	0.0486148	x
4472399	k__Bacteria; p__Firmicutes; c__Clostridia; o__Clostridiales; f__Lachnospiraceae; g__; s__	0 ± 0	0.002 ± 0.001	0.0486148	x
128382	k__Bacteria; p__Firmicutes; c__Clostridia; o__Clostridiales; f__Veillonellaceae; g__Dialister; s__	0.001 ± 0.001	0 ± 0	0.0489078	x
180366	k__Bacteria; p__Firmicutes; c__Clostridia; o__Clostridiales; f__Lachnospiraceae; g__; s__	0.001 ± 0.001	0 ± 0	0.0489078	x
186963	k__Bacteria; p__Firmicutes; c__Clostridia; o__Clostridiales; f__Ruminococcaceae; g__; s__	0.001 ± 0.001	0 ± 0	0.0489078	x
197581	k__Bacteria; p__Firmicutes; c__Clostridia; o__Clostridiales; f__Lachnospiraceae; g__Lachnospira; s__	0.001 ± 0.001	0 ± 0	0.0489078	x
330414	k__Bacteria; p__Firmicutes; c__Clostridia; o__Clostridiales; f__; g__; s__	0.001 ± 0.001	0 ± 0	0.0489078	x
330469	k__Bacteria; p__Firmicutes; c__Clostridia; o__Clostridiales; f__Ruminococcaceae; g__; s__	0.001 ± 0.001	0 ± 0	0.0489078	x
350668	k__Bacteria; p__Firmicutes; c__Clostridia; o__Clostridiales; f__Clostridiaceae; g__Clostridium; s__	0.001 ± 0.001	0 ± 0	0.0489078	x
3366133	k__Bacteria; p__Firmicutes; c__Clostridia; o__Clostridiales; f__Lachnospiraceae; g__[Ruminococcus]; s__torques	0.001 ± 0	0 ± 0	0.0489078	x
4087649	k__Bacteria; p__Firmicutes; c__Clostridia; o__Clostridiales; f__Lachnospiraceae; g__; s__	0.001 ± 0.001	0 ± 0	0.0489078	x
4424598	k__Bacteria; p__Firmicutes; c__Clostridia; o__Clostridiales; f__Lachnospiraceae; g__Lachnospira; s__	0.001 ± 0.001	0 ± 0	0.0489078	x
4439530	k__Bacteria; p__Firmicutes; c__Clostridia; o__Clostridiales; f__Clostridiaceae; g__; s__	0.001 ± 0.001	0 ± 0	0.0489078	x
180661	k__Bacteria; p__Firmicutes; c__Clostridia; o__Clostridiales; f__Ruminococcaceae; g__; s__	0.004 ± 0.002	0 ± 0	0.048951	x
199501	k__Bacteria; p__Firmicutes; c__Clostridia; o__Clostridiales; f__Lachnospiraceae; g__Blautia; s__	0.001 ± 0.001	0.004 ± 0.001	0.048951	x
4449427	k__Bacteria; p__Firmicutes; c__Clostridia; o__Clostridiales; f__Lachnospiraceae; g__Dorea; s__	0.006 ± 0.004	0 ± 0	0.048951	x
230421	k__Bacteria; p__Firmicutes; c__Clostridia; o__Clostridiales; f__Ruminococcaceae; g__; s__	0.001 ± 0.001	0 ± 0	0.049159	x
291266	k__Bacteria; p__Firmicutes; c__Clostridia; o__Clostridiales; f__Ruminococcaceae; g__; s__	0.001 ± 0.001	0 ± 0	0.049159	x
1751298	k__Bacteria; p__Firmicutes; c__Clostridia; o__Clostridiales; f__Lachnospiraceae; g__Roseburia; s__	0.001 ± 0.001	0 ± 0	0.049159	x
2201995	k__Bacteria; p__Proteobacteria; c__Betaproteobacteria; o__Burkholderiales; f__Alcaligenaceae; g__Sutterella; s__	0.001 ± 0.001	0 ± 0	0.049159	x
4113009	k__Bacteria; p__Firmicutes; c__Clostridia; o__Clostridiales; f__Lachnospiraceae; g__; s__	0.001 ± 0.001	0 ± 0	0.049159	x
4356065	k__Bacteria; p__Firmicutes; c__Clostridia; o__Clostridiales; f__Lachnospiraceae; g__; s__	0.001 ± 0.001	0 ± 0	0.049159	x
176192	k__Bacteria; p__Firmicutes; c__Clostridia; o__Clostridiales; f__Lachnospiraceae; g__[Ruminococcus]; s__	0.003 ± 0.002	0.022 ± 0.011	x	x
183401	k__Bacteria; p__Firmicutes; c__Clostridia; o__Clostridiales; f__Lachnospiraceae; g__; s__	0.001 ± 0	0.003 ± 0.001	x	x
1817731	k__Bacteria; p__Firmicutes; c__Clostridia; o__Clostridiales; f__Ruminococcaceae; g__; s__	0.006 ± 0.003	0 ± 0	x	x
179018	k__Bacteria; p__Firmicutes; c__Erysipelotrichi; o__Erysipelotrichales; f__Erysipelotrichaceae; g__[Eubacterium]; s__biforme	0 ± 0	0.001 ± 0.001	x	x
195418	k__Bacteria; p__Firmicutes; c__Clostridia; o__Clostridiales; f__; g__; s__	0 ± 0	0.001 ± 0.001	x	x
3438276	k__Bacteria; p__Firmicutes; c__Clostridia; o__Clostridiales; f__Clostridiaceae; g__Clostridium; s__	0 ± 0	0.001 ± 0.001	x	x
178607	k__Bacteria; p__Firmicutes; c__Clostridia; o__Clostridiales; f__Lachnospiraceae; g__Blautia; s__	0.02 ± 0.006	0.051 ± 0.014	x	x
184391	k__Bacteria; p__Firmicutes; c__Clostridia; o__Clostridiales; f__Lachnospiraceae; g__Blautia; s__	0.018 ± 0.007	0.004 ± 0.002	x	x
258099	k__Bacteria; p__Firmicutes; c__Clostridia; o__Clostridiales; f__Ruminococcaceae; g__; s__	0 ± 0	0.002 ± 0.001	x	x
813479	k__Bacteria; p__Actinobacteria; c__Actinobacteria; o__Bifidobacteriales; f__Bifidobacteriaceae; g__Bifidobacterium; s__	0.006 ± 0.004	0.024 ± 0.008	x	x
1904686	k__Bacteria; p__Firmicutes; c__Erysipelotrichi; o__Erysipelotrichales; f__Erysipelotrichaceae; g__[Eubacterium]; s__dolichum	0.014 ± 0.013	0 ± 0	x	x
4316391	k__Bacteria; p__Firmicutes; c__Clostridia; o__Clostridiales; f__Veillonellaceae; g__Veillonella; s__dispar	0.005 ± 0.004	0 ± 0	x	x
185244	k__Bacteria; p__Firmicutes; c__Clostridia; o__Clostridiales; f__Ruminococcaceae; g__Faecalibacterium; s__prausnitzii	0.042 ± 0.018	0.006 ± 0.002	x	x
189524	k__Bacteria; p__Firmicutes; c__Clostridia; o__Clostridiales; f__Ruminococcaceae; g__; s__	0.007 ± 0.003	0.001 ± 0.001	x	x
192684	k__Bacteria; p__Bacteroidetes; c__Bacteroidia; o__Bacteroidales; f__Bacteroidaceae; g__Bacteroides; s__	0.013 ± 0.008	0 ± 0	x	x
195492	k__Bacteria; p__Firmicutes; c__Clostridia; o__Clostridiales; f__Ruminococcaceae; g__; s__	0.004 ± 0.002	0 ± 0	x	x
1830364	k__Bacteria; p__Firmicutes; c__Clostridia; o__Clostridiales; f__Lachnospiraceae; g__[Ruminococcus]; s__gnavus	0.004 ± 0.002	0.001 ± 0	x	x
2555599	k__Bacteria; p__Firmicutes; c__Clostridia; o__Clostridiales; f__Lachnospiraceae; g__Dorea; s__	0.026 ± 0.02	0 ± 0	x	x
173969	k__Bacteria; p__Firmicutes; c__Clostridia; o__Clostridiales; f__Lachnospiraceae; g__Coprococcus; s__	0.001 ± 0.001	0.004 ± 0.002	x	x
4420474	k__Bacteria; p__Proteobacteria; c__Gammaproteobacteria; o__Pasteurellales; f__Pasteurellaceae; g__Haemophilus; s__parainfluenzae	0.003 ± 0.001	0.001 ± 0	x	x
183703	k__Bacteria; p__Firmicutes; c__Clostridia; o__Clostridiales; f__Ruminococcaceae; g__; s__	0.11 ± 0.045	0.019 ± 0.009	x	x
183866	k__Bacteria; p__Firmicutes; c__Clostridia; o__Clostridiales; f__Lachnospiraceae; g__Blautia; s__	0.001 ± 0	0.003 ± 0.001	x	x
184760	k__Bacteria; p__Firmicutes; c__Clostridia; o__Clostridiales; f__Ruminococcaceae; g__; s__	0.069 ± 0.036	0.014 ± 0.007	x	x
196902	k__Bacteria; p__Firmicutes; c__Clostridia; o__Clostridiales; f__Ruminococcaceae; g__Faecalibacterium; s__prausnitzii	0.033 ± 0.018	0.004 ± 0.002	x	x
235262	k__Bacteria; p__Actinobacteria; c__Actinobacteria; o__Bifidobacteriales; f__Bifidobacteriaceae; g__Bifidobacterium; s__adolescentis	0.001 ± 0.001	0.003 ± 0.001	x	x
322114	k__Bacteria; p__Firmicutes; c__Clostridia; o__Clostridiales; f__Lachnospiraceae; g__Roseburia; s__	0.02 ± 0.017	0.001 ± 0.001	x	x
4483045	k__Bacteria; p__Firmicutes; c__Clostridia; o__Clostridiales; f__; g__; s__	0.004 ± 0.003	0 ± 0	x	x
184656	k__Bacteria; p__Firmicutes; c__Clostridia; o__Clostridiales; f__Lachnospiraceae; g__Coprococcus; s__	0.017 ± 0.006	0.096 ± 0.041	x	x
199448	k__Bacteria; p__Firmicutes; c__Clostridia; o__Clostridiales; f__Ruminococcaceae; g__; s__	0.005 ± 0.003	0.001 ± 0	x	x
295485	k__Bacteria; p__Firmicutes; c__Clostridia; o__Clostridiales; f__Ruminococcaceae; g__Faecalibacterium; s__prausnitzii	0.006 ± 0.003	0 ± 0	x	x
2283112	k__Bacteria; p__Firmicutes; c__Clostridia; o__Clostridiales; f__Ruminococcaceae; g__; s__	0.02 ± 0.007	0.004 ± 0.002	x	x
183071	k__Bacteria; p__Firmicutes; c__Clostridia; o__Clostridiales; f__Ruminococcaceae; g__; s__	0.002 ± 0.001	0.001 ± 0	x	x
4335815	k__Bacteria; p__Firmicutes; c__Clostridia; o__Clostridiales; f__Lachnospiraceae; g__Roseburia; s__	0.002 ± 0.001	0.001 ± 0	x	x
4403113	k__Bacteria; p__Firmicutes; c__Clostridia; o__Clostridiales; f__Ruminococcaceae; g__Faecalibacterium; s__prausnitzii	0.002 ± 0.001	0.001 ± 0	x	x
178640	k__Bacteria; p__Firmicutes; c__Clostridia; o__Clostridiales; f__Clostridiaceae; g__; s__	0.001 ± 0.001	0.004 ± 0.002	x	x
185884	k__Bacteria; p__Firmicutes; c__Clostridia; o__Clostridiales; f__Lachnospiraceae; g__Blautia; s__producta	0.001 ± 0.001	0.009 ± 0.005	x	x
363735	k__Bacteria; p__Firmicutes; c__Clostridia; o__Clostridiales; f__Lachnospiraceae; g__Blautia; s__	0.003 ± 0.001	0.008 ± 0.002	x	x
292521	k__Bacteria; p__Actinobacteria; c__Actinobacteria; o__Bifidobacteriales; f__Bifidobacteriaceae; g__Bifidobacterium; s__	0.001 ± 0	0.004 ± 0.002	x	x
230232	k__Bacteria; p__Firmicutes; c__Clostridia; o__Clostridiales; f__Lachnospiraceae; g__Dorea; s__	0.001 ± 0.001	0.013 ± 0.006	x	x
182799	k__Bacteria; p__Firmicutes; c__Clostridia; o__Clostridiales; f__Lachnospiraceae; g__Lachnospira; s__	0.011 ± 0.006	0.002 ± 0.001	x	x
196307	k__Bacteria; p__Firmicutes; c__Clostridia; o__Clostridiales; f__Ruminococcaceae; g__; s__	0.014 ± 0.006	0.002 ± 0.001	x	x
366781	k__Bacteria; p__Firmicutes; c__Clostridia; o__Clostridiales; f__Clostridiaceae; g__Clostridium; s__	0 ± 0	0.14 ± 0.103	x	x
2411212	k__Bacteria; p__Firmicutes; c__Clostridia; o__Clostridiales; f__Ruminococcaceae; g__; s__	0.002 ± 0.001	0 ± 0	x	x
4381555	k__Bacteria; p__Firmicutes; c__Clostridia; o__Clostridiales; f__Ruminococcaceae; g__; s__	0.007 ± 0.004	0.001 ± 0.001	x	x
4401373	k__Bacteria; p__Firmicutes; c__Clostridia; o__Clostridiales; f__Veillonellaceae; g__Veillonella; s__dispar	0.146 ± 0.13	0.003 ± 0.001	x	x
175570	k__Bacteria; p__Firmicutes; c__Clostridia; o__Clostridiales; f__Ruminococcaceae; g__Faecalibacterium; s__prausnitzii	0.006 ± 0.003	0 ± 0	x	x
180999	k__Bacteria; p__Firmicutes; c__Clostridia; o__Clostridiales; f__Lachnospiraceae; g__; s__	0.007 ± 0.003	0.001 ± 0.001	x	x
198209	k__Bacteria; p__Firmicutes; c__Clostridia; o__Clostridiales; f__Clostridiaceae; g__SMB53; s__	0.012 ± 0.004	0.04 ± 0.013	x	x
182431	k__Bacteria; p__Firmicutes; c__Clostridia; o__Clostridiales; f__Ruminococcaceae; g__; s__	0.007 ± 0.003	0.001 ± 0.001	x	x
195716	k__Bacteria; p__Firmicutes; c__Clostridia; o__Clostridiales; f__Lachnospiraceae; g__Coprococcus; s__	0.002 ± 0.001	0.006 ± 0.002	x	x
182766	k__Bacteria; p__Firmicutes; c__Clostridia; o__Clostridiales; f__Lachnospiraceae; g__Blautia; s__	0.005 ± 0.004	0.02 ± 0.006	x	x
3530697	k__Bacteria; p__Firmicutes; c__Clostridia; o__Clostridiales; f__Ruminococcaceae; g__; s__	0.03 ± 0.011	0.008 ± 0.003	x	x
316732	k__Bacteria; p__Firmicutes; c__Clostridia; o__Clostridiales; f__Lachnospiraceae; g__Lachnospira; s__	0.207 ± 0.09	0.041 ± 0.022	x	x
4401375	k__Bacteria; p__Bacteroidetes; c__Bacteroidia; o__Bacteroidales; f__Bacteroidaceae; g__Bacteroides; s__uniformis	0.066 ± 0.048	0 ± 0	x	x
157338	k__Bacteria; p__Firmicutes; c__Clostridia; o__Clostridiales; f__; g__; s__	0 ± 0	0.038 ± 0.027	x	x
178183	k__Bacteria; p__Firmicutes; c__Clostridia; o__Clostridiales; f__Clostridiaceae; g__; s__	0.007 ± 0.003	0.023 ± 0.008	x	x
3138798	k__Bacteria; p__Firmicutes; c__Clostridia; o__Clostridiales; f__Veillonellaceae; g__Phascolarctobacterium; s__	0.091 ± 0.068	0 ± 0	x	x
198252	k__Bacteria; p__Firmicutes; c__Clostridia; o__Clostridiales; f__Lachnospiraceae; g__Coprococcus; s__	0 ± 0	0.004 ± 0.002	x	x
174279	k__Bacteria; p__Firmicutes; c__Clostridia; o__Clostridiales; f__; g__; s__	0.01 ± 0.006	0.076 ± 0.044	x	x
187443	k__Bacteria; p__Bacteroidetes; c__Bacteroidia; o__Bacteroidales; f__Bacteroidaceae; g__Bacteroides; s__ovatus	0.305 ± 0.209	0.002 ± 0.001	x	x
194487	k__Bacteria; p__Firmicutes; c__Clostridia; o__Clostridiales; f__Clostridiaceae; g__; s__	0 ± 0	0.003 ± 0.002	x	x
254446	k__Bacteria; p__Firmicutes; c__Clostridia; o__Clostridiales; f__Clostridiaceae; g__; s__	0.017 ± 0.008	0.058 ± 0.02	x	x
354334	k__Bacteria; p__Firmicutes; c__Clostridia; o__Clostridiales; f__Ruminococcaceae; g__; s__	0.007 ± 0.003	0.001 ± 0.001	x	x
136127	k__Bacteria; p__Actinobacteria; c__Coriobacteriia; o__Coriobacteriales; f__Coriobacteriaceae; g__; s__	0 ± 0	0.004 ± 0.003	x	x
197343	k__Bacteria; p__Firmicutes; c__Clostridia; o__Clostridiales; f__Ruminococcaceae; g__; s__	0.003 ± 0.001	0.001 ± 0.001	x	x
2985051	k__Bacteria; p__Actinobacteria; c__Coriobacteriia; o__Coriobacteriales; f__Coriobacteriaceae; g__; s__	0.012 ± 0.007	0.041 ± 0.013	x	x
4432516	k__Bacteria; p__Firmicutes; c__Clostridia; o__Clostridiales; f__Clostridiaceae; g__; s__	0.013 ± 0.007	0.118 ± 0.068	x	x
190676	k__Bacteria; p__Firmicutes; c__Clostridia; o__Clostridiales; f__Ruminococcaceae; g__Oscillospira; s__	0.002 ± 0.001	0 ± 0	x	x
195548	k__Bacteria; p__Firmicutes; c__Clostridia; o__Clostridiales; f__; g__; s__	0.002 ± 0.001	0 ± 0	x	x
2056702	k__Bacteria; p__Firmicutes; c__Clostridia; o__Clostridiales; f__Ruminococcaceae; g__; s__	0.002 ± 0.001	0 ± 0	x	x
4458758	k__Bacteria; p__Proteobacteria; c__Gammaproteobacteria; o__Pasteurellales; f__Pasteurellaceae; g__Haemophilus; s__parainfluenzae	0.002 ± 0.001	0 ± 0	x	x
180659	k__Bacteria; p__Firmicutes; c__Clostridia; o__Clostridiales; f__Ruminococcaceae; g__Oscillospira; s__	0.047 ± 0.034	0.002 ± 0.001	x	x
3235048	k__Bacteria; p__Firmicutes; c__Clostridia; o__Clostridiales; f__Ruminococcaceae; g__Ruminococcus; s__	0.063 ± 0.036	0.006 ± 0.006	x	x
4454025	k__Bacteria; p__Firmicutes; c__Clostridia; o__Clostridiales; f__Lachnospiraceae; g__; s__	0.008 ± 0.005	0.001 ± 0	x	x
187271	k__Bacteria; p__Firmicutes; c__Clostridia; o__Clostridiales; f__Lachnospiraceae; g__Blautia; s__	0 ± 0	0.003 ± 0.002	x	x
158804	k__Bacteria; p__Actinobacteria; c__Actinobacteria; o__Actinomycetales; f__Nocardioidaceae; g__; s__	0 ± 0	0.001 ± 0.001	x	x
177933	k__Bacteria; p__Firmicutes; c__Clostridia; o__Clostridiales; f__Lachnospiraceae; g__Coprococcus; s__	0 ± 0	0.001 ± 0.001	x	x
180801	k__Bacteria; p__Firmicutes; c__Clostridia; o__Clostridiales; f__Ruminococcaceae; g__; s__	0 ± 0	0.001 ± 0.001	x	x
182317	k__Bacteria; p__Firmicutes; c__Clostridia; o__Clostridiales; f__; g__; s__	0 ± 0	0.001 ± 0	x	x
184610	k__Bacteria; p__Bacteroidetes; c__Bacteroidia; o__Bacteroidales; f__Bacteroidaceae; g__Bacteroides; s__caccae	0 ± 0	0.001 ± 0.001	x	x
189296	k__Bacteria; p__Firmicutes; c__Clostridia; o__Clostridiales; f__Lachnospiraceae; g__[Ruminococcus]; s__	0 ± 0	0.001 ± 0.001	x	x
193868	k__Bacteria; p__Firmicutes; c__Clostridia; o__Clostridiales; f__Lachnospiraceae; g__; s__	0 ± 0	0.001 ± 0	x	x
197675	k__Bacteria; p__Firmicutes; c__Clostridia; o__Clostridiales; f__Lachnospiraceae; g__Coprococcus; s__	0 ± 0	0.001 ± 0.001	x	x
306499	k__Bacteria; p__Firmicutes; c__Clostridia; o__Clostridiales; f__Lachnospiraceae; g__; s__	0 ± 0	0.001 ± 0	x	x
336205	k__Bacteria; p__Firmicutes; c__Clostridia; o__Clostridiales; f__Lachnospiraceae; g__Coprococcus; s__	0 ± 0	0.001 ± 0	x	x
344965	k__Bacteria; p__Proteobacteria; c__Deltaproteobacteria; o__Desulfuromonadales; f__Geobacteraceae; g__Geobacter; s__	0 ± 0	0.001 ± 0.001	x	x
353392	k__Bacteria; p__Firmicutes; c__Clostridia; o__Clostridiales; f__Clostridiaceae; g__SMB53; s__	0 ± 0	0.001 ± 0.001	x	x
368950	k__Bacteria; p__Firmicutes; c__Clostridia; o__Clostridiales; f__Lachnospiraceae; g__Blautia; s__	0 ± 0	0.001 ± 0	x	x
370183	k__Bacteria; p__Firmicutes; c__Clostridia; o__Clostridiales; f__Lachnospiraceae; g__Blautia; s__	0 ± 0	0.001 ± 0	x	x
542066	k__Bacteria; p__Actinobacteria; c__Actinobacteria; o__Actinomycetales; f__; g__; s__	0 ± 0	0.001 ± 0.001	x	x
787709	k__Bacteria; p__Actinobacteria; c__Actinobacteria; o__Actinomycetales; f__Actinomycetaceae; g__Actinomyces; s__	0 ± 0	0.001 ± 0	x	x
849346	k__Bacteria; p__Firmicutes; c__Clostridia; o__Clostridiales; f__Ruminococcaceae; g__; s__	0 ± 0	0.001 ± 0.001	x	x
965500	k__Bacteria; p__Firmicutes; c__Bacilli; o__Lactobacillales; f__Streptococcaceae; g__Streptococcus; s__	0 ± 0	0.001 ± 0	x	x
1068836	k__Bacteria; p__Firmicutes; c__Clostridia; o__Clostridiales; f__Ruminococcaceae; g__Ruminococcus; s__	0 ± 0	0.001 ± 0.001	x	x
1134896	k__Bacteria; p__Actinobacteria; c__Actinobacteria; o__Actinomycetales; f__Brevibacteriaceae; g__Brevibacterium; s__	0 ± 0	0.001 ± 0.001	x	x
1565317	k__Bacteria; p__Firmicutes; c__Bacilli; o__Bacillales; f__Bacillaceae; g__Geobacillus; s__	0 ± 0	0.001 ± 0.001	x	x
1914811	k__Bacteria; p__Firmicutes; c__Clostridia; o__Clostridiales; f__Lachnospiraceae; g__[Ruminococcus]; s__	0 ± 0	0.001 ± 0	x	x
2122726	k__Bacteria; p__Firmicutes; c__Clostridia; o__Clostridiales; f__; g__; s__	0 ± 0	0.001 ± 0.001	x	x
2183213	k__Bacteria; p__Firmicutes; c__Clostridia; o__Clostridiales; f__Lachnospiraceae; g__; s__	0 ± 0	0.001 ± 0.001	x	x
3805726	k__Bacteria; p__Firmicutes; c__Clostridia; o__Clostridiales; f__[Mogibacteriaceae]; g__; s__	0 ± 0	0.001 ± 0.001	x	x
3889756	k__Bacteria; p__Firmicutes; c__Clostridia; o__Clostridiales; f__Veillonellaceae; g__Veillonella; s__parvula	0 ± 0	0.001 ± 0.001	x	x
4004991	k__Bacteria; p__Firmicutes; c__Clostridia; o__Clostridiales; f__Lachnospiraceae; g__Lachnospira; s__	0 ± 0	0.001 ± 0.001	x	x
4043275	k__Bacteria; p__Firmicutes; c__Clostridia; o__Clostridiales; f__Clostridiaceae; g__; s__	0 ± 0	0.001 ± 0	x	x
4339351	k__Bacteria; p__Bacteroidetes; c__Sphingobacteriia; o__Sphingobacteriales; f__Sphingobacteriaceae; g__Pedobacter; s__	0 ± 0	0.001 ± 0.001	x	x
4353264	k__Bacteria; p__Proteobacteria; c__Alphaproteobacteria; o__Caulobacterales; f__Caulobacteraceae; g__; s__	0 ± 0	0.001 ± 0	x	x
4361528	k__Bacteria; p__Proteobacteria; c__Gammaproteobacteria; o__Pseudomonadales; f__Moraxellaceae; g__Acinetobacter; s__	0 ± 0	0.001 ± 0.001	x	x
4380137	k__Bacteria; p__Firmicutes; c__Clostridia; o__Clostridiales; f__Peptostreptococcaceae; g__; s__	0 ± 0	0.001 ± 0	x	x
4404181	k__Bacteria; p__Firmicutes; c__Clostridia; o__Clostridiales; f__Ruminococcaceae; g__; s__	0 ± 0	0.001 ± 0.001	x	x
4449525	k__Bacteria; p__Bacteroidetes; c__Bacteroidia; o__Bacteroidales; f__[Paraprevotellaceae]; g__[Prevotella]; s__	0 ± 0	0.001 ± 0	x	x
181826	k__Bacteria; p__Firmicutes; c__Clostridia; o__Clostridiales; f__Ruminococcaceae; g__; s__	0.006 ± 0.002	0.002 ± 0.001	x	x
194110	k__Bacteria; p__Firmicutes; c__Clostridia; o__Clostridiales; f__Lachnospiraceae; g__Lachnospira; s__	0.008 ± 0.006	0 ± 0	x	x
197060	k__Bacteria; p__Firmicutes; c__Clostridia; o__Clostridiales; f__Clostridiaceae; g__; s__	0.001 ± 0.001	0.013 ± 0.008	x	x
180681	k__Bacteria; p__Firmicutes; c__Clostridia; o__Clostridiales; f__; g__; s__	0.032 ± 0.014	0.007 ± 0.004	x	x
194014	k__Bacteria; p__Firmicutes; c__Clostridia; o__Clostridiales; f__; g__; s__	0 ± 0	0.014 ± 0.011	x	x
184592	k__Bacteria; p__Firmicutes; c__Clostridia; o__Clostridiales; f__Lachnospiraceae; g__; s__	0.023 ± 0.01	0.058 ± 0.015	x	x
188057	k__Bacteria; p__Firmicutes; c__Clostridia; o__Clostridiales; f__Lachnospiraceae; g__; s__	0 ± 0	0.036 ± 0.025	x	x
188648	k__Bacteria; p__Firmicutes; c__Clostridia; o__Clostridiales; f__Lachnospiraceae; g__; s__	0.001 ± 0	0.004 ± 0.001	x	x
192370	k__Bacteria; p__Firmicutes; c__Clostridia; o__Clostridiales; f__Ruminococcaceae; g__; s__	0.005 ± 0.002	0.001 ± 0.001	x	x
3300804	k__Bacteria; p__Firmicutes; c__Clostridia; o__Clostridiales; f__Lachnospiraceae; g__; s__	0.005 ± 0.003	0 ± 0	x	x
175635	k__Bacteria; p__Firmicutes; c__Clostridia; o__Clostridiales; f__Lachnospiraceae; g__; s__	0.029 ± 0.016	0.002 ± 0.001	x	x
544419	k__Bacteria; p__Firmicutes; c__Bacilli; o__Lactobacillales; f__Streptococcaceae; g__Lactococcus; s__	0 ± 0	0.003 ± 0.002	x	x
903426	k__Bacteria; p__Actinobacteria; c__Actinobacteria; o__Actinomycetales; f__Micrococcaceae; g__Rothia; s__mucilaginosa	0 ± 0	0.007 ± 0.006	x	x
712677	k__Bacteria; p__Firmicutes; c__Clostridia; o__Clostridiales; f__Clostridiaceae; g__SMB53; s__	0.005 ± 0.003	0.031 ± 0.016	x	x
1722623	k__Bacteria; p__Firmicutes; c__Bacilli; o__Lactobacillales; f__Lactobacillaceae; g__Lactobacillus; s__	0.001 ± 0.001	0.059 ± 0.049	x	x
3438642	k__Bacteria; p__Firmicutes; c__Clostridia; o__Clostridiales; f__Lachnospiraceae; g__[Ruminococcus]; s__	0 ± 0	0.009 ± 0.006	x	x
174332	k__Bacteria; p__Firmicutes; c__Clostridia; o__Clostridiales; f__Lachnospiraceae; g__Blautia; s__	0 ± 0	0.004 ± 0.003	x	x
197346	k__Bacteria; p__Firmicutes; c__Clostridia; o__Clostridiales; f__Lachnospiraceae; g__Blautia; s__	0.004 ± 0.002	0.001 ± 0.001	x	x
190155	k__Bacteria; p__Firmicutes; c__Clostridia; o__Clostridiales; f__Ruminococcaceae; g__; s__	0.004 ± 0.002	0.001 ± 0	x	x
176399	k__Bacteria; p__Firmicutes; c__Clostridia; o__Clostridiales; f__Lachnospiraceae; g__; s__	0.002 ± 0.002	0.079 ± 0.036	x	x
4449054	k__Bacteria; p__Bacteroidetes; c__Bacteroidia; o__Bacteroidales; f__Bacteroidaceae; g__Bacteroides; s__	0.067 ± 0.034	0.008 ± 0.006	x	x
174950	k__Bacteria; p__Firmicutes; c__Clostridia; o__Clostridiales; f__Lachnospiraceae; g__Blautia; s__	0 ± 0	0.002 ± 0.001	x	x
290696	k__Bacteria; p__Firmicutes; c__Clostridia; o__Clostridiales; f__Lachnospiraceae; g__Blautia; s__	0 ± 0	0.002 ± 0.001	x	x
319687	k__Bacteria; p__Firmicutes; c__Clostridia; o__Clostridiales; f__Ruminococcaceae; g__; s__	0 ± 0	0.002 ± 0.001	x	x
2157225	k__Bacteria; p__Firmicutes; c__Clostridia; o__Clostridiales; f__Clostridiaceae; g__; s__	0 ± 0	0.002 ± 0.001	x	x
183048	k__Bacteria; p__Firmicutes; c__Clostridia; o__Clostridiales; f__Ruminococcaceae; g__; s__	0.017 ± 0.011	0.003 ± 0.001	x	x
178701	k__Bacteria; p__Firmicutes; c__Clostridia; o__Clostridiales; f__Ruminococcaceae; g__Faecalibacterium; s__prausnitzii	0.017 ± 0.009	0.003 ± 0.002	x	x
184234	k__Bacteria; p__Firmicutes; c__Clostridia; o__Clostridiales; f__; g__; s__	0.001 ± 0	0.004 ± 0.002	x	x
198426	k__Bacteria; p__Firmicutes; c__Clostridia; o__Clostridiales; f__Lachnospiraceae; g__; s__	0.005 ± 0.003	0.001 ± 0.001	x	x
3244896	k__Bacteria; p__Firmicutes; c__Bacilli; o__Lactobacillales; f__Streptococcaceae; g__Streptococcus; s__	0 ± 0	0.004 ± 0.003	x	x
4347159	k__Bacteria; p__Actinobacteria; c__Actinobacteria; o__Bifidobacteriales; f__Bifidobacteriaceae; g__Bifidobacterium; s__adolescentis	0.969 ± 0.811	6.609 ± 2.966	x	x
4350701	k__Bacteria; p__Firmicutes; c__Clostridia; o__Clostridiales; f__Clostridiaceae; g__; s__	0.01 ± 0.007	0.08 ± 0.045	x	x
292228	k__Bacteria; p__Firmicutes; c__Clostridia; o__Clostridiales; f__Lachnospiraceae; g__Blautia; s__	0.002 ± 0.001	0.008 ± 0.003	x	x
4325533	k__Bacteria; p__Bacteroidetes; c__Bacteroidia; o__Bacteroidales; f__Rikenellaceae; g__; s__	2.488 ± 1.619	0.083 ± 0.033	x	x
187932	k__Bacteria; p__Firmicutes; c__Clostridia; o__Clostridiales; f__Lachnospiraceae; g__Blautia; s__	0.01 ± 0.003	0.023 ± 0.006	x	x
365621	k__Bacteria; p__Firmicutes; c__Clostridia; o__Clostridiales; f__; g__; s__	0.003 ± 0.001	0.001 ± 0	x	x
187736	k__Bacteria; p__Firmicutes; c__Clostridia; o__Clostridiales; f__Lachnospiraceae; g__[Ruminococcus]; s__	0.012 ± 0.006	0.031 ± 0.009	x	x
196787	k__Bacteria; p__Firmicutes; c__Clostridia; o__Clostridiales; f__Ruminococcaceae; g__; s__	0.03 ± 0.015	0.006 ± 0.003	x	x
186256	k__Bacteria; p__Firmicutes; c__Clostridia; o__Clostridiales; f__Lachnospiraceae; g__Blautia; s__	0.003 ± 0.001	0.011 ± 0.004	x	x
584241	k__Bacteria; p__Firmicutes; c__Bacilli; o__Lactobacillales; f__Enterococcaceae; g__Enterococcus; s__casseliflavus	0 ± 0	0.003 ± 0.002	x	x
34139	k__Bacteria; p__Firmicutes; c__Clostridia; o__Clostridiales; f__; g__; s__	0.001 ± 0.001	0 ± 0	x	x
130048	k__Bacteria; p__Firmicutes; c__Clostridia; o__Clostridiales; f__Ruminococcaceae; g__; s__	0.001 ± 0.001	0 ± 0	x	x
141709	k__Bacteria; p__Proteobacteria; c__Betaproteobacteria; o__Burkholderiales; f__Comamonadaceae; g__; s__	0.001 ± 0.001	0 ± 0	x	x
174499	k__Bacteria; p__Firmicutes; c__Clostridia; o__Clostridiales; f__Lachnospiraceae; g__; s__	0.001 ± 0.001	0 ± 0	x	x
176346	k__Bacteria; p__Firmicutes; c__Clostridia; o__Clostridiales; f__Lachnospiraceae; g__Roseburia; s__	0.001 ± 0	0 ± 0	x	x
178439	k__Bacteria; p__Firmicutes; c__Clostridia; o__Clostridiales; f__Lachnospiraceae; g__; s__	0.001 ± 0	0 ± 0	x	x
178965	k__Bacteria; p__Firmicutes; c__Clostridia; o__Clostridiales; f__; g__; s__	0.001 ± 0	0 ± 0	x	x
179662	k__Bacteria; p__Firmicutes; c__Clostridia; o__Clostridiales; f__Ruminococcaceae; g__; s__	0.001 ± 0	0 ± 0	x	x
179729	k__Bacteria; p__Firmicutes; c__Clostridia; o__Clostridiales; f__Lachnospiraceae; g__Blautia; s__	0.001 ± 0.001	0 ± 0	x	x
179744	k__Bacteria; p__Firmicutes; c__Clostridia; o__Clostridiales; f__; g__; s__	0.001 ± 0.001	0 ± 0	x	x
179760	k__Bacteria; p__Firmicutes; c__Clostridia; o__Clostridiales; f__; g__; s__	0.001 ± 0	0 ± 0	x	x
181572	k__Bacteria; p__Firmicutes; c__Clostridia; o__Clostridiales; f__Lachnospiraceae; g__; s__	0.001 ± 0	0 ± 0	x	x
182886	k__Bacteria; p__Bacteroidetes; c__Bacteroidia; o__Bacteroidales; f__Bacteroidaceae; g__Bacteroides; s__uniformis	0.001 ± 0.001	0 ± 0	x	x
183137	k__Bacteria; p__Firmicutes; c__Clostridia; o__Clostridiales; f__Lachnospiraceae; g__; s__	0.001 ± 0.001	0 ± 0	x	x
183457	k__Bacteria; p__Firmicutes; c__Clostridia; o__Clostridiales; f__; g__; s__	0.001 ± 0	0 ± 0	x	x
183824	k__Bacteria; p__Firmicutes; c__Clostridia; o__Clostridiales; f__Lachnospiraceae; g__Blautia; s__	0.001 ± 0	0 ± 0	x	x
185734	k__Bacteria; p__Firmicutes; c__Clostridia; o__Clostridiales; f__Ruminococcaceae; g__Faecalibacterium; s__prausnitzii	0.001 ± 0	0 ± 0	x	x
187123	k__Bacteria; p__Firmicutes; c__Clostridia; o__Clostridiales; f__Ruminococcaceae; g__; s__	0.001 ± 0.001	0 ± 0	x	x
187706	k__Bacteria; p__Firmicutes; c__Clostridia; o__Clostridiales; f__Ruminococcaceae; g__; s__	0.001 ± 0	0 ± 0	x	x
188262	k__Bacteria; p__Firmicutes; c__Clostridia; o__Clostridiales; f__; g__; s__	0.001 ± 0	0 ± 0	x	x
190961	k__Bacteria; p__Firmicutes; c__Clostridia; o__Clostridiales; f__Lachnospiraceae; g__; s__	0.001 ± 0	0 ± 0	x	x
191487	k__Bacteria; p__Bacteroidetes; c__Bacteroidia; o__Bacteroidales; f__Bacteroidaceae; g__Bacteroides; s__	0.001 ± 0	0 ± 0	x	x
192865	k__Bacteria; p__Bacteroidetes; c__Bacteroidia; o__Bacteroidales; f__Bacteroidaceae; g__Bacteroides; s__	0.001 ± 0.001	0 ± 0	x	x
193348	k__Bacteria; p__Firmicutes; c__Clostridia; o__Clostridiales; f__Ruminococcaceae; g__; s__	0.001 ± 0	0 ± 0	x	x
193769	k__Bacteria; p__Firmicutes; c__Clostridia; o__Clostridiales; f__Lachnospiraceae; g__[Ruminococcus]; s__gnavus	0.001 ± 0	0 ± 0	x	x
194219	k__Bacteria; p__Firmicutes; c__Clostridia; o__Clostridiales; f__Ruminococcaceae; g__; s__	0.001 ± 0	0 ± 0	x	x
195719	k__Bacteria; p__Firmicutes; c__Clostridia; o__Clostridiales; f__Lachnospiraceae; g__Roseburia; s__	0.001 ± 0.001	0 ± 0	x	x
197418	k__Bacteria; p__Firmicutes; c__Clostridia; o__Clostridiales; f__Ruminococcaceae; g__; s__	0.001 ± 0	0 ± 0	x	x
197552	k__Bacteria; p__Firmicutes; c__Clostridia; o__Clostridiales; f__; g__; s__	0.001 ± 0.001	0 ± 0	x	x
198156	k__Bacteria; p__Firmicutes; c__Clostridia; o__Clostridiales; f__Lachnospiraceae; g__Blautia; s__	0.001 ± 0.001	0 ± 0	x	x
198192	k__Bacteria; p__Firmicutes; c__Clostridia; o__Clostridiales; f__Lachnospiraceae; g__; s__	0.001 ± 0	0 ± 0	x	x
198273	k__Bacteria; p__Firmicutes; c__Clostridia; o__Clostridiales; f__Lachnospiraceae; g__Lachnobacterium; s__	0.001 ± 0.001	0 ± 0	x	x
199491	k__Bacteria; p__Firmicutes; c__Clostridia; o__Clostridiales; f__Lachnospiraceae; g__Coprococcus; s__	0.001 ± 0	0 ± 0	x	x
240271	k__Bacteria; p__Firmicutes; c__Clostridia; o__Clostridiales; f__Ruminococcaceae; g__Oscillospira; s__	0.001 ± 0	0 ± 0	x	x
292909	k__Bacteria; p__Firmicutes; c__Clostridia; o__Clostridiales; f__Lachnospiraceae; g__; s__	0.001 ± 0	0 ± 0	x	x
297111	k__Bacteria; p__Firmicutes; c__Clostridia; o__Clostridiales; f__Ruminococcaceae; g__Oscillospira; s__	0.001 ± 0.001	0 ± 0	x	x
300103	k__Bacteria; p__Firmicutes; c__Clostridia; o__Clostridiales; f__Lachnospiraceae; g__; s__	0.001 ± 0	0 ± 0	x	x
305313	k__Bacteria; p__Firmicutes; c__Clostridia; o__Clostridiales; f__Lachnospiraceae; g__Dorea; s__	0.001 ± 0.001	0 ± 0	x	x
306299	k__Bacteria; p__Firmicutes; c__Clostridia; o__Clostridiales; f__Lachnospiraceae; g__; s__	0.001 ± 0.001	0 ± 0	x	x
313764	k__Bacteria; p__Bacteroidetes; c__Bacteroidia; o__Bacteroidales; f__Bacteroidaceae; g__Bacteroides; s__	0.001 ± 0	0 ± 0	x	x
345176	k__Bacteria; p__Firmicutes; c__Clostridia; o__Clostridiales; f__Ruminococcaceae; g__; s__	0.001 ± 0.001	0 ± 0	x	x
346639	k__Bacteria; p__Firmicutes; c__Clostridia; o__Clostridiales; f__; g__; s__	0.001 ± 0.001	0 ± 0	x	x
360518	k__Bacteria; p__Bacteroidetes; c__Bacteroidia; o__Bacteroidales; f__Bacteroidaceae; g__Bacteroides; s__	0.001 ± 0.001	0 ± 0	x	x
366451	k__Bacteria; p__Proteobacteria; c__Gammaproteobacteria; o__Enterobacteriales; f__Enterobacteriaceae; g__; s__	0.001 ± 0	0 ± 0	x	x
523099	k__Bacteria; p__Firmicutes; c__Clostridia; o__Clostridiales; f__; g__; s__	0.001 ± 0.001	0 ± 0	x	x
569017	k__Bacteria; p__Firmicutes; c__Clostridia; o__Clostridiales; f__Ruminococcaceae; g__; s__	0.001 ± 0.001	0 ± 0	x	x
573413	k__Bacteria; p__Proteobacteria; c__Alphaproteobacteria; o__Sphingomonadales; f__Sphingomonadaceae; g__Sphingomonas; s__azotifigens	0.001 ± 0.001	0 ± 0	x	x
591439	k__Bacteria; p__Firmicutes; c__Clostridia; o__Clostridiales; f__[Mogibacteriaceae]; g__; s__	0.001 ± 0.001	0 ± 0	x	x
610111	k__Bacteria; p__Bacteroidetes; c__Bacteroidia; o__Bacteroidales; f__Prevotellaceae; g__Prevotella; s__	0.001 ± 0.001	0 ± 0	x	x
808794	k__Bacteria; p__Firmicutes; c__Clostridia; o__Clostridiales; f__Lachnospiraceae; g__; s__	0.001 ± 0	0 ± 0	x	x
1077373	k__Bacteria; p__Bacteroidetes; c__Bacteroidia; o__Bacteroidales; f__Prevotellaceae; g__Prevotella; s__	0.001 ± 0.001	0 ± 0	x	x
1624383	k__Bacteria; p__Firmicutes; c__Clostridia; o__Clostridiales; f__Lachnospiraceae; g__Lachnospira; s__	0.001 ± 0	0 ± 0	x	x
1713225	k__Bacteria; p__Firmicutes; c__Clostridia; o__Clostridiales; f__Lachnospiraceae; g__[Ruminococcus]; s__gnavus	0.001 ± 0	0 ± 0	x	x
1950496	k__Bacteria; p__Bacteroidetes; c__Bacteroidia; o__Bacteroidales; f__Bacteroidaceae; g__Bacteroides; s__	0.001 ± 0.001	0 ± 0	x	x
2035344	k__Bacteria; p__Firmicutes; c__Clostridia; o__Clostridiales; f__Lachnospiraceae; g__Blautia; s__	0.001 ± 0	0 ± 0	x	x
2875735	k__Bacteria; p__Bacteroidetes; c__Bacteroidia; o__Bacteroidales; f__Bacteroidaceae; g__Bacteroides; s__	0.001 ± 0	0 ± 0	x	x
4321810	k__Bacteria; p__Firmicutes; c__Clostridia; o__Clostridiales; f__Lachnospiraceae; g__Blautia; s__	0.001 ± 0.001	0 ± 0	x	x
4329090	k__Bacteria; p__Bacteroidetes; c__Bacteroidia; o__Bacteroidales; f__Bacteroidaceae; g__Bacteroides; s__	0.001 ± 0.001	0 ± 0	x	x
4333654	k__Bacteria; p__Firmicutes; c__Clostridia; o__Clostridiales; f__Ruminococcaceae; g__; s__	0.001 ± 0	0 ± 0	x	x
4378688	k__Bacteria; p__Bacteroidetes; c__Bacteroidia; o__Bacteroidales; f__Bacteroidaceae; g__Bacteroides; s__	0.001 ± 0.001	0 ± 0	x	x
4383924	k__Bacteria; p__Firmicutes; c__Clostridia; o__Clostridiales; f__; g__; s__	0.001 ± 0.001	0 ± 0	x	x
4385318	k__Bacteria; p__Bacteroidetes; c__Bacteroidia; o__Bacteroidales; f__Bacteroidaceae; g__Bacteroides; s__caccae	0.001 ± 0	0 ± 0	x	x
4388121	k__Bacteria; p__Firmicutes; c__Clostridia; o__Clostridiales; f__Lachnospiraceae; g__; s__	0.001 ± 0	0 ± 0	x	x
4474951	k__Bacteria; p__Firmicutes; c__Clostridia; o__Clostridiales; f__Veillonellaceae; g__Veillonella; s__parvula	0.001 ± 0	0 ± 0	x	x
4483037	k__Bacteria; p__Firmicutes; c__Clostridia; o__Clostridiales; f__Lachnospiraceae; g__; s__	0.001 ± 0.001	0 ± 0	x	x
175750	k__Bacteria; p__Firmicutes; c__Clostridia; o__Clostridiales; f__Lachnospiraceae; g__; s__	0.021 ± 0.009	0.004 ± 0.001	x	x
182469	k__Bacteria; p__Firmicutes; c__Clostridia; o__Clostridiales; f__Lachnospiraceae; g__; s__	0 ± 0	0.003 ± 0.002	x	x
190577	k__Bacteria; p__Firmicutes; c__Clostridia; o__Clostridiales; f__Lachnospiraceae; g__; s__	0.003 ± 0.002	0.014 ± 0.007	x	x
307680	k__Bacteria; p__Firmicutes; c__Clostridia; o__Clostridiales; f__Ruminococcaceae; g__; s__	0.016 ± 0.012	0 ± 0	x	x
344525	k__Bacteria; p__Bacteroidetes; c__Bacteroidia; o__Bacteroidales; f__Bacteroidaceae; g__Bacteroides; s__eggerthii	0.009 ± 0.008	0 ± 0	x	x
180099	k__Bacteria; p__Firmicutes; c__Clostridia; o__Clostridiales; f__Lachnospiraceae; g__; s__	0 ± 0	0.001 ± 0.001	x	x
522025	k__Bacteria; p__Firmicutes; c__Bacilli; o__Lactobacillales; f__Streptococcaceae; g__Streptococcus; s__	0 ± 0	0.001 ± 0.001	x	x
593848	k__Bacteria; p__Proteobacteria; c__Gammaproteobacteria; o__Xanthomonadales; f__Xanthomonadaceae; g__Stenotrophomonas; s__	0 ± 0	0.001 ± 0.001	x	x
3697034	k__Bacteria; p__Firmicutes; c__Bacilli; o__Lactobacillales; f__Enterococcaceae; g__Enterococcus; s__	0 ± 0	0.001 ± 0.001	x	x
4015729	k__Bacteria; p__Firmicutes; c__Clostridia; o__Clostridiales; f__Lachnospiraceae; g__Dorea; s__formicigenerans	0 ± 0	0.001 ± 0.001	x	x
4466707	k__Bacteria; p__Firmicutes; c__Clostridia; o__Clostridiales; f__Lachnospiraceae; g__Coprococcus; s__	0 ± 0	0.001 ± 0.001	x	x
174337	k__Bacteria; p__Verrucomicrobia; c__Verrucomicrobiae; o__Verrucomicrobiales; f__Verrucomicrobiaceae; g__Akkermansia; s__muciniphila	0 ± 0	0.003 ± 0.002	x	x
188610	k__Bacteria; p__Firmicutes; c__Clostridia; o__Clostridiales; f__Lachnospiraceae; g__; s__	0 ± 0	0.001 ± 0.001	x	x
188753	k__Bacteria; p__Firmicutes; c__Clostridia; o__Clostridiales; f__Lachnospiraceae; g__Blautia; s__	0 ± 0	0.001 ± 0.001	x	x
312311	k__Bacteria; p__Firmicutes; c__Clostridia; o__Clostridiales; f__Lachnospiraceae; g__; s__	0 ± 0	0.001 ± 0.001	x	x
1126851	k__Bacteria; p__Firmicutes; c__Bacilli; o__Lactobacillales; f__Streptococcaceae; g__Streptococcus; s__	0 ± 0	0.001 ± 0.001	x	x
3141342	k__Bacteria; p__Firmicutes; c__Clostridia; o__Clostridiales; f__Lachnospiraceae; g__Coprococcus; s__	0 ± 0	0.001 ± 0.001	x	x
3450453	k__Bacteria; p__Firmicutes; c__Clostridia; o__Clostridiales; f__Lachnospiraceae; g__Blautia; s__	0 ± 0	0.001 ± 0	x	x
179435	k__Bacteria; p__Firmicutes; c__Clostridia; o__Clostridiales; f__Lachnospiraceae; g__; s__	0.002 ± 0.001	0 ± 0	x	x
189407	k__Bacteria; p__Firmicutes; c__Clostridia; o__Clostridiales; f__[Mogibacteriaceae]; g__; s__	0.104 ± 0.033	0.315 ± 0.11	x	x
293511	k__Bacteria; p__Firmicutes; c__Clostridia; o__Clostridiales; f__Lachnospiraceae; g__; s__	0.004 ± 0.002	0.001 ± 0.001	x	x
4453501	k__Bacteria; p__Firmicutes; c__Clostridia; o__Clostridiales; f__Veillonellaceae; g__Veillonella; s__dispar	0.048 ± 0.042	0.001 ± 0	x	x
180082	k__Bacteria; p__Bacteroidetes; c__Bacteroidia; o__Bacteroidales; f__Porphyromonadaceae; g__Parabacteroides; s__	0.172 ± 0.096	0.014 ± 0.006	x	x
177987	k__Bacteria; p__Firmicutes; c__Clostridia; o__Clostridiales; f__Lachnospiraceae; g__Lachnospira; s__	0.007 ± 0.003	0.002 ± 0.001	x	x
179720	k__Bacteria; p__Firmicutes; c__Clostridia; o__Clostridiales; f__Ruminococcaceae; g__Faecalibacterium; s__prausnitzii	0.016 ± 0.01	0.002 ± 0.001	x	x
195149	k__Bacteria; p__Firmicutes; c__Clostridia; o__Clostridiales; f__; g__; s__	0.001 ± 0	0.003 ± 0.002	x	x
4468234	k__Bacteria; p__Bacteroidetes; c__Bacteroidia; o__Bacteroidales; f__Bacteroidaceae; g__Bacteroides; s__	0.028 ± 0.018	0.002 ± 0.001	x	x
187050	k__Bacteria; p__Firmicutes; c__Clostridia; o__Clostridiales; f__Lachnospiraceae; g__Blautia; s__producta	0 ± 0	0.004 ± 0.003	x	x
199430	k__Bacteria; p__Firmicutes; c__Clostridia; o__Clostridiales; f__Ruminococcaceae; g__Faecalibacterium; s__prausnitzii	0.003 ± 0.001	0.001 ± 0	x	x
2724175	k__Bacteria; p__Firmicutes; c__Clostridia; o__Clostridiales; f__Lachnospiraceae; g__; s__	0.016 ± 0.008	0.003 ± 0.001	x	x
4341534	k__Bacteria; p__Firmicutes; c__Clostridia; o__Clostridiales; f__Ruminococcaceae; g__; s__	0.004 ± 0.002	0 ± 0	x	x
185428	k__Bacteria; p__Firmicutes; c__Clostridia; o__Clostridiales; f__Ruminococcaceae; g__; s__	0.002 ± 0.001	0.001 ± 0	x	x
335670	k__Bacteria; p__Firmicutes; c__Clostridia; o__Clostridiales; f__Ruminococcaceae; g__; s__	0.002 ± 0.001	0.001 ± 0	x	x
193657	k__Bacteria; p__Firmicutes; c__Clostridia; o__Clostridiales; f__Ruminococcaceae; g__; s__	0.009 ± 0.005	0 ± 0	x	x
4354582	k__Bacteria; p__Firmicutes; c__Clostridia; o__Clostridiales; f__Lachnospiraceae; g__Dorea; s__	0.003 ± 0.002	0 ± 0	x	x
176108	k__Bacteria; p__Bacteroidetes; c__Bacteroidia; o__Bacteroidales; f__Rikenellaceae; g__; s__	0.001 ± 0.001	0 ± 0	x	x
176890	k__Bacteria; p__Firmicutes; c__Clostridia; o__Clostridiales; f__; g__; s__	0.001 ± 0.001	0 ± 0	x	x
186139	k__Bacteria; p__Firmicutes; c__Clostridia; o__Clostridiales; f__Ruminococcaceae; g__; s__	0.001 ± 0.001	0 ± 0	x	x
188127	k__Bacteria; p__Firmicutes; c__Clostridia; o__Clostridiales; f__; g__; s__	0.001 ± 0	0 ± 0	x	x
193831	k__Bacteria; p__Firmicutes; c__Clostridia; o__Clostridiales; f__Clostridiaceae; g__Clostridium; s__	0.001 ± 0	0 ± 0	x	x
199710	k__Bacteria; p__Firmicutes; c__Clostridia; o__Clostridiales; f__; g__; s__	0.001 ± 0.001	0 ± 0	x	x
336614	k__Bacteria; p__Firmicutes; c__Clostridia; o__Clostridiales; f__Lachnospiraceae; g__; s__	0.001 ± 0.001	0 ± 0	x	x
851715	k__Bacteria; p__Firmicutes; c__Erysipelotrichi; o__Erysipelotrichales; f__Erysipelotrichaceae; g__[Eubacterium]; s__dolichum	0.001 ± 0.001	0 ± 0	x	x
4045882	k__Bacteria; p__Firmicutes; c__Clostridia; o__Clostridiales; f__Lachnospiraceae; g__; s__	0.001 ± 0	0 ± 0	x	x
4435396	k__Bacteria; p__Bacteroidetes; c__Bacteroidia; o__Bacteroidales; f__Bacteroidaceae; g__Bacteroides; s__	0.001 ± 0.001	0 ± 0	x	x
175184	k__Bacteria; p__Firmicutes; c__Clostridia; o__Clostridiales; f__Ruminococcaceae; g__; s__	0.012 ± 0.005	0.004 ± 0.001	x	x
175729	k__Bacteria; p__Firmicutes; c__Clostridia; o__Clostridiales; f__Lachnospiraceae; g__; s__	0.029 ± 0.01	0.01 ± 0.004	x	x
194177	k__Bacteria; p__Firmicutes; c__Clostridia; o__Clostridiales; f__Lachnospiraceae; g__; s__	0.004 ± 0.002	0.001 ± 0.001	x	x
176115	k__Bacteria; p__Firmicutes; c__Clostridia; o__Clostridiales; f__Ruminococcaceae; g__Faecalibacterium; s__prausnitzii	0.036 ± 0.02	0.004 ± 0.002	x	x
193763	k__Bacteria; p__Firmicutes; c__Clostridia; o__Clostridiales; f__; g__; s__	0.007 ± 0.003	0.002 ± 0.001	x	x
4300121	k__Bacteria; p__Actinobacteria; c__Actinobacteria; o__Actinomycetales; f__Actinomycetaceae; g__Actinomyces; s__	0.001 ± 0	0.003 ± 0.001	x	x
4422039	k__Bacteria; p__Firmicutes; c__Clostridia; o__Clostridiales; f__Lachnospiraceae; g__Roseburia; s__	0.005 ± 0.003	0 ± 0	x	x
90487	k__Bacteria; p__Bacteroidetes; c__Bacteroidia; o__Bacteroidales; f__Bacteroidaceae; g__Bacteroides; s__	0.003 ± 0.002	0 ± 0	x	x
185888	k__Bacteria; p__Bacteroidetes; c__Bacteroidia; o__Bacteroidales; f__Bacteroidaceae; g__Bacteroides; s__	0.006 ± 0.004	0 ± 0	x	x
1889556	k__Bacteria; p__Bacteroidetes; c__Bacteroidia; o__Bacteroidales; f__Bacteroidaceae; g__Bacteroides; s__uniformis	0.446 ± 0.196	0.08 ± 0.063	x	x
4400151	k__Bacteria; p__Firmicutes; c__Clostridia; o__Clostridiales; f__Clostridiaceae; g__; s__	0.042 ± 0.026	0.288 ± 0.163	x	x
196100	k__Bacteria; p__Firmicutes; c__Clostridia; o__Clostridiales; f__Lachnospiraceae; g__; s__	0 ± 0	0.003 ± 0.001	x	x
292735	k__Bacteria; p__Firmicutes; c__Clostridia; o__Clostridiales; f__Lachnospiraceae; g__Blautia; s__	0.003 ± 0.001	0.006 ± 0.001	x	x
772282	k__Bacteria; p__Bacteroidetes; c__Bacteroidia; o__Bacteroidales; f__Rikenellaceae; g__; s__	0.005 ± 0.003	0 ± 0	x	x
4331364	k__Bacteria; p__Firmicutes; c__Clostridia; o__Clostridiales; f__Lachnospiraceae; g__; s__	0.002 ± 0.001	0.015 ± 0.007	x	x
4423027	k__Bacteria; p__Proteobacteria; c__Gammaproteobacteria; o__Enterobacteriales; f__Enterobacteriaceae; g__; s__	0.018 ± 0.017	0 ± 0	x	x
180257	k__Bacteria; p__Firmicutes; c__Clostridia; o__Clostridiales; f__; g__; s__	0.006 ± 0.005	0 ± 0	x	x
211706	k__Bacteria; p__Bacteroidetes; c__Bacteroidia; o__Bacteroidales; f__Bacteroidaceae; g__Bacteroides; s__	0.106 ± 0.087	0 ± 0	x	x
340219	k__Bacteria; p__Firmicutes; c__Clostridia; o__Clostridiales; f__Ruminococcaceae; g__Faecalibacterium; s__prausnitzii	0.004 ± 0.003	0 ± 0	x	x
4420408	k__Bacteria; p__Bacteroidetes; c__Bacteroidia; o__Bacteroidales; f__Bacteroidaceae; g__Bacteroides; s__	1.291 ± 0.93	0.007 ± 0.004	x	x
181984	k__Bacteria; p__Firmicutes; c__Clostridia; o__Clostridiales; f__Ruminococcaceae; g__; s__	1.699 ± 0.891	0.375 ± 0.188	x	x
332778	k__Bacteria; p__Firmicutes; c__Clostridia; o__Clostridiales; f__Lachnospiraceae; g__; s__	0.008 ± 0.006	0 ± 0	x	x
191792	k__Bacteria; p__Firmicutes; c__Clostridia; o__Clostridiales; f__Ruminococcaceae; g__; s__	0.007 ± 0.004	0.001 ± 0	x	x
198145	k__Bacteria; p__Firmicutes; c__Clostridia; o__Clostridiales; f__Lachnospiraceae; g__Blautia; s__	0.003 ± 0.002	0.009 ± 0.003	x	x
1952	k__Bacteria; p__Bacteroidetes; c__Bacteroidia; o__Bacteroidales; f__Porphyromonadaceae; g__Parabacteroides; s__	0.007 ± 0.004	0 ± 0	x	x
184770	k__Bacteria; p__Firmicutes; c__Clostridia; o__Clostridiales; f__Lachnospiraceae; g__Coprococcus; s__	0.036 ± 0.018	0.007 ± 0.003	x	x
191990	k__Bacteria; p__Firmicutes; c__Clostridia; o__Clostridiales; f__Ruminococcaceae; g__; s__	0.003 ± 0.002	0 ± 0	x	x
270382	k__Bacteria; p__Firmicutes; c__Clostridia; o__Clostridiales; f__Clostridiaceae; g__; s__	0.008 ± 0.004	0.027 ± 0.01	x	x
1860112	k__Bacteria; p__Firmicutes; c__Clostridia; o__Clostridiales; f__Lachnospiraceae; g__; s__	0.035 ± 0.012	0.014 ± 0.004	x	x
182854	k__Bacteria; p__Bacteroidetes; c__Bacteroidia; o__Bacteroidales; f__Bacteroidaceae; g__Bacteroides; s__	0.012 ± 0.006	0.001 ± 0.001	x	x
183340	k__Bacteria; p__Firmicutes; c__Clostridia; o__Clostridiales; f__Lachnospiraceae; g__Blautia; s__	0.001 ± 0.001	0.003 ± 0.001	x	x
3256931	k__Bacteria; p__Bacteroidetes; c__Bacteroidia; o__Bacteroidales; f__Bacteroidaceae; g__Bacteroides; s__	0.003 ± 0.002	0 ± 0	x	x
4469576	k__Bacteria; p__Firmicutes; c__Clostridia; o__Clostridiales; f__Lachnospiraceae; g__; s__	0.005 ± 0.003	0 ± 0	x	x
188018	k__Bacteria; p__Firmicutes; c__Clostridia; o__Clostridiales; f__Lachnospiraceae; g__; s__	0.317 ± 0.152	0.722 ± 0.18	x	x
196047	k__Bacteria; p__Firmicutes; c__Clostridia; o__Clostridiales; f__Lachnospiraceae; g__[Ruminococcus]; s__	0.011 ± 0.005	0.036 ± 0.014	x	x
4435784	k__Bacteria; p__Bacteroidetes; c__Bacteroidia; o__Bacteroidales; f__Bacteroidaceae; g__Bacteroides; s__	0.008 ± 0.006	0.001 ± 0	x	x
535955	k__Bacteria; p__Firmicutes; c__Clostridia; o__Clostridiales; f__Clostridiaceae; g__SMB53; s__	0.063 ± 0.027	0.018 ± 0.005	x	x
2230862	k__Bacteria; p__Firmicutes; c__Clostridia; o__Clostridiales; f__; g__; s__	0.003 ± 0.003	0 ± 0	x	x
179905	k__Bacteria; p__Firmicutes; c__Clostridia; o__Clostridiales; f__Lachnospiraceae; g__; s__	0.009 ± 0.007	0 ± 0	x	x
187324	k__Bacteria; p__Bacteroidetes; c__Bacteroidia; o__Bacteroidales; f__Bacteroidaceae; g__Bacteroides; s__caccae	0.223 ± 0.144	0.005 ± 0.004	x	x
1624481	k__Bacteria; p__Firmicutes; c__Clostridia; o__Clostridiales; f__Lachnospiraceae; g__Roseburia; s__faecis	0.002 ± 0.001	0 ± 0	x	x
186549	k__Bacteria; p__Firmicutes; c__Clostridia; o__Clostridiales; f__; g__; s__	0.001 ± 0	0.002 ± 0.001	x	x
191214	k__Bacteria; p__Firmicutes; c__Clostridia; o__Clostridiales; f__Lachnospiraceae; g__; s__	0.001 ± 0	0.002 ± 0.001	x	x
2953981	k__Bacteria; p__Firmicutes; c__Bacilli; o__Lactobacillales; f__Streptococcaceae; g__Streptococcus; s__	0.001 ± 0.001	0.002 ± 0.001	x	x
3191793	k__Bacteria; p__Firmicutes; c__Clostridia; o__Clostridiales; f__; g__; s__	0.001 ± 0	0.002 ± 0.001	x	x
4380450	k__Bacteria; p__Firmicutes; c__Clostridia; o__Clostridiales; f__Ruminococcaceae; g__; s__	0.001 ± 0.001	0.002 ± 0.001	x	x
4444262	k__Bacteria; p__Firmicutes; c__Clostridia; o__Clostridiales; f__Lachnospiraceae; g__; s__	0.001 ± 0.001	0.002 ± 0.001	x	x
4395708	k__Bacteria; p__Firmicutes; c__Clostridia; o__Clostridiales; f__Lachnospiraceae; g__[Ruminococcus]; s__	0.001 ± 0	0.005 ± 0.003	x	x
292145	k__Bacteria; p__Firmicutes; c__Clostridia; o__Clostridiales; f__Clostridiaceae; g__; s__	0.013 ± 0.012	0 ± 0	x	x
4427688	k__Bacteria; p__Firmicutes; c__Clostridia; o__Clostridiales; f__Lachnospiraceae; g__[Ruminococcus]; s__	0.001 ± 0.001	0.006 ± 0.004	x	x
2921213	k__Bacteria; p__Bacteroidetes; c__Bacteroidia; o__Bacteroidales; f__Bacteroidaceae; g__Bacteroides; s__	0.003 ± 0.002	0 ± 0	x	x
197402	k__Bacteria; p__Firmicutes; c__Clostridia; o__Clostridiales; f__Lachnospiraceae; g__Blautia; s__	0.001 ± 0	0.002 ± 0.001	x	x
370086	k__Bacteria; p__Firmicutes; c__Clostridia; o__Clostridiales; f__Ruminococcaceae; g__; s__	0.02 ± 0.011	0.003 ± 0.003	x	x
180312	k__Bacteria; p__Firmicutes; c__Clostridia; o__Clostridiales; f__Lachnospiraceae; g__; s__	0.003 ± 0.002	0 ± 0	x	x
196246	k__Bacteria; p__Firmicutes; c__Clostridia; o__Clostridiales; f__Ruminococcaceae; g__Faecalibacterium; s__prausnitzii	0.019 ± 0.009	0.005 ± 0.003	x	x
174850	k__Bacteria; p__Firmicutes; c__Clostridia; o__Clostridiales; f__; g__; s__	0.011 ± 0.004	0.03 ± 0.01	x	x
185759	k__Bacteria; p__Firmicutes; c__Clostridia; o__Clostridiales; f__Lachnospiraceae; g__Blautia; s__	0.002 ± 0.001	0.004 ± 0.001	x	x
329668	k__Bacteria; p__Firmicutes; c__Clostridia; o__Clostridiales; f__Ruminococcaceae; g__; s__	0.004 ± 0.002	0.001 ± 0.001	x	x
2545820	k__Bacteria; p__Firmicutes; c__Clostridia; o__Clostridiales; f__Lachnospiraceae; g__Dorea; s__	0.002 ± 0.001	0 ± 0	x	x
189503	k__Bacteria; p__Firmicutes; c__Clostridia; o__Clostridiales; f__Clostridiaceae; g__; s__	0.135 ± 0.046	0.37 ± 0.131	x	x
4359220	k__Bacteria; p__Firmicutes; c__Clostridia; o__Clostridiales; f__Veillonellaceae; g__Veillonella; s__dispar	0.01 ± 0.007	0.001 ± 0	x	x
175520	k__Bacteria; p__Firmicutes; c__Clostridia; o__Clostridiales; f__Ruminococcaceae; g__; s__	0.002 ± 0.001	0.001 ± 0	x	x
361266	k__Bacteria; p__Firmicutes; c__Clostridia; o__Clostridiales; f__Ruminococcaceae; g__; s__	0.002 ± 0.001	0.001 ± 0	x	x
181791	k__Bacteria; p__Firmicutes; c__Clostridia; o__Clostridiales; f__Lachnospiraceae; g__Blautia; s__obeum	0.003 ± 0.001	0.007 ± 0.002	x	x
186090	k__Bacteria; p__Firmicutes; c__Clostridia; o__Clostridiales; f__Ruminococcaceae; g__Ruminococcus; s__	0.01 ± 0.005	0.002 ± 0.002	x	x
195465	k__Bacteria; p__Firmicutes; c__Clostridia; o__Clostridiales; f__Lachnospiraceae; g__; s__	0.029 ± 0.016	0.004 ± 0.001	x	x
184013	k__Bacteria; p__Firmicutes; c__Clostridia; o__Clostridiales; f__Lachnospiraceae; g__Coprococcus; s__	0.001 ± 0.001	0 ± 0	x	x
185769	k__Bacteria; p__Firmicutes; c__Clostridia; o__Clostridiales; f__Ruminococcaceae; g__Faecalibacterium; s__prausnitzii	0.001 ± 0.001	0 ± 0	x	x
191241	k__Bacteria; p__Firmicutes; c__Clostridia; o__Clostridiales; f__Ruminococcaceae; g__; s__	0.001 ± 0.001	0 ± 0	x	x
322367	k__Bacteria; p__Firmicutes; c__Clostridia; o__Clostridiales; f__Clostridiaceae; g__; s__	0.001 ± 0.001	0 ± 0	x	x
525215	k__Bacteria; p__Firmicutes; c__Clostridia; o__Clostridiales; f__Ruminococcaceae; g__Faecalibacterium; s__prausnitzii	0.001 ± 0.001	0 ± 0	x	x
2123719	k__Bacteria; p__Firmicutes; c__Clostridia; o__Clostridiales; f__Lachnospiraceae; g__Roseburia; s__	0.001 ± 0.001	0 ± 0	x	x
4331782	k__Bacteria; p__Firmicutes; c__Clostridia; o__Clostridiales; f__Lachnospiraceae; g__; s__	0.001 ± 0.001	0 ± 0	x	x
4338803	k__Bacteria; p__Firmicutes; c__Clostridia; o__Clostridiales; f__Lachnospiraceae; g__[Ruminococcus]; s__gnavus	0.001 ± 0.001	0 ± 0	x	x
4384044	k__Bacteria; p__Firmicutes; c__Bacilli; o__Lactobacillales; f__Streptococcaceae; g__Streptococcus; s__	0.001 ± 0.001	0 ± 0	x	x
193477	k__Bacteria; p__Firmicutes; c__Clostridia; o__Clostridiales; f__Lachnospiraceae; g__; s__	0.006 ± 0.003	0.001 ± 0.001	x	x
215269	k__Bacteria; p__Firmicutes; c__Clostridia; o__Clostridiales; f__Ruminococcaceae; g__; s__	0.008 ± 0.006	0.156 ± 0.084	x	x
527988	k__Bacteria; p__Firmicutes; c__Clostridia; o__Clostridiales; f__Eubacteriaceae; g__Anaerofustis; s__	0.001 ± 0.001	0.003 ± 0.001	x	x
174749	k__Bacteria; p__Firmicutes; c__Clostridia; o__Clostridiales; f__Ruminococcaceae; g__; s__	0.022 ± 0.007	0.009 ± 0.005	x	x
182986	k__Bacteria; p__Firmicutes; c__Clostridia; o__Clostridiales; f__Ruminococcaceae; g__Faecalibacterium; s__prausnitzii	0.291 ± 0.151	0.069 ± 0.037	x	x
216111	k__Bacteria; p__Firmicutes; c__Clostridia; o__Clostridiales; f__Lachnospiraceae; g__; s__	0.034 ± 0.019	0.005 ± 0.002	x	x
3997242	k__Bacteria; p__Bacteroidetes; c__Bacteroidia; o__Bacteroidales; f__Bacteroidaceae; g__Bacteroides; s__	0.151 ± 0.119	0.001 ± 0.001	x	x
4442130	k__Bacteria; p__Firmicutes; c__Bacilli; o__Lactobacillales; f__Streptococcaceae; g__Streptococcus; s__	0.01 ± 0.006	0.026 ± 0.008	x	x
178708	k__Bacteria; p__Firmicutes; c__Clostridia; o__Clostridiales; f__Lachnospiraceae; g__; s__	0.002 ± 0.001	0 ± 0	x	x
196428	k__Bacteria; p__Firmicutes; c__Clostridia; o__Clostridiales; f__Ruminococcaceae; g__; s__	0.471 ± 0.171	0.155 ± 0.097	x	x
299858	k__Bacteria; p__Firmicutes; c__Clostridia; o__Clostridiales; f__Lachnospiraceae; g__; s__	0.004 ± 0.002	0 ± 0	x	x
2250345	k__Bacteria; p__Firmicutes; c__Clostridia; o__Clostridiales; f__Lachnospiraceae; g__; s__	0.007 ± 0.003	0.001 ± 0.001	x	x
3940440	k__Bacteria; p__Bacteroidetes; c__Bacteroidia; o__Bacteroidales; f__Bacteroidaceae; g__Bacteroides; s__	0.046 ± 0.036	0.002 ± 0.001	x	x
173987	k__Bacteria; p__Firmicutes; c__Clostridia; o__Clostridiales; f__Ruminococcaceae; g__; s__	0.011 ± 0.005	0.003 ± 0.002	x	x
175560	k__Bacteria; p__Firmicutes; c__Clostridia; o__Clostridiales; f__Ruminococcaceae; g__Faecalibacterium; s__prausnitzii	0.007 ± 0.004	0.001 ± 0.001	x	x
189588	k__Bacteria; p__Firmicutes; c__Clostridia; o__Clostridiales; f__Lachnospiraceae; g__Blautia; s__	0 ± 0	0.001 ± 0.001	x	x
189647	k__Bacteria; p__Firmicutes; c__Clostridia; o__Clostridiales; f__Lachnospiraceae; g__; s__	0 ± 0	0.001 ± 0.001	x	x
359872	k__Bacteria; p__Proteobacteria; c__Deltaproteobacteria; o__Desulfovibrionales; f__Desulfovibrionaceae; g__Bilophila; s__	0.085 ± 0.052	0.004 ± 0.002	x	x
3180933	k__Bacteria; p__Bacteroidetes; c__Bacteroidia; o__Bacteroidales; f__Bacteroidaceae; g__Bacteroides; s__ovatus	0.012 ± 0.009	0 ± 0	x	x
4306157	k__Bacteria; p__Proteobacteria; c__Gammaproteobacteria; o__Pasteurellales; f__Pasteurellaceae; g__Haemophilus; s__parainfluenzae	0.007 ± 0.004	0.001 ± 0	x	x
4429239	k__Bacteria; p__Firmicutes; c__Clostridia; o__Clostridiales; f__; g__; s__	0.006 ± 0.005	0 ± 0	x	x
191355	k__Bacteria; p__Firmicutes; c__Erysipelotrichi; o__Erysipelotrichales; f__Erysipelotrichaceae; g__; s__	0.259 ± 0.198	0.026 ± 0.01	x	x
188863	k__Bacteria; p__Firmicutes; c__Clostridia; o__Clostridiales; f__Ruminococcaceae; g__; s__	0.003 ± 0.001	0.001 ± 0.001	x	x
193667	k__Bacteria; p__Firmicutes; c__Clostridia; o__Clostridiales; f__Ruminococcaceae; g__Faecalibacterium; s__	0.01 ± 0.005	0.002 ± 0.001	x	x
4430639	k__Bacteria; p__Proteobacteria; c__Gammaproteobacteria; o__Pasteurellales; f__Pasteurellaceae; g__Haemophilus; s__parainfluenzae	0.877 ± 0.4	0.144 ± 0.045	x	x
182538	k__Bacteria; p__Firmicutes; c__Clostridia; o__Clostridiales; f__Lachnospiraceae; g__Coprococcus; s__	0.002 ± 0.001	0 ± 0	x	x
147702	k__Bacteria; p__Firmicutes; c__Clostridia; o__Clostridiales; f__Ruminococcaceae; g__Faecalibacterium; s__prausnitzii	0.022 ± 0.01	0.005 ± 0.003	x	x
198587	k__Bacteria; p__Firmicutes; c__Clostridia; o__Clostridiales; f__Ruminococcaceae; g__; s__	0.029 ± 0.015	0.006 ± 0.003	x	x
188333	k__Bacteria; p__Firmicutes; c__Clostridia; o__Clostridiales; f__Lachnospiraceae; g__[Ruminococcus]; s__gnavus	0.01 ± 0.006	0.001 ± 0	x	x
65400	k__Bacteria; p__Proteobacteria; c__Gammaproteobacteria; o__Pseudomonadales; f__Pseudomonadaceae; g__Pseudomonas; s__viridiflava	0 ± 0	0.001 ± 0.001	x	x
73471	k__Bacteria; p__Actinobacteria; c__Actinobacteria; o__Actinomycetales; f__Actinomycetaceae; g__Actinomyces; s__	0 ± 0	0.001 ± 0	x	x
130214	k__Bacteria; p__Firmicutes; c__Clostridia; o__Clostridiales; f__Lachnospiraceae; g__Blautia; s__	0 ± 0	0.001 ± 0	x	x
167204	k__Bacteria; p__Firmicutes; c__Clostridia; o__Clostridiales; f__; g__; s__	0 ± 0	0.001 ± 0	x	x
179067	k__Bacteria; p__Firmicutes; c__Clostridia; o__Clostridiales; f__; g__; s__	0 ± 0	0.001 ± 0	x	x
179620	k__Bacteria; p__Firmicutes; c__Erysipelotrichi; o__Erysipelotrichales; f__Erysipelotrichaceae; g__[Eubacterium]; s__biforme	0 ± 0	0.001 ± 0.001	x	x
181417	k__Bacteria; p__Firmicutes; c__Clostridia; o__Clostridiales; f__Lachnospiraceae; g__Blautia; s__	0 ± 0	0.001 ± 0	x	x
186891	k__Bacteria; p__Firmicutes; c__Clostridia; o__Clostridiales; f__Lachnospiraceae; g__; s__	0 ± 0	0.001 ± 0	x	x
189091	k__Bacteria; p__Firmicutes; c__Clostridia; o__Clostridiales; f__Ruminococcaceae; g__Faecalibacterium; s__prausnitzii	0 ± 0	0.001 ± 0.001	x	x
190610	k__Bacteria; p__Firmicutes; c__Clostridia; o__Clostridiales; f__Lachnospiraceae; g__Blautia; s__	0 ± 0	0.001 ± 0	x	x
193221	k__Bacteria; p__Firmicutes; c__Clostridia; o__Clostridiales; f__Lachnospiraceae; g__[Ruminococcus]; s__	0 ± 0	0.001 ± 0	x	x
196122	k__Bacteria; p__Firmicutes; c__Clostridia; o__Clostridiales; f__; g__; s__	0 ± 0	0.001 ± 0	x	x
196604	k__Bacteria; p__Firmicutes; c__Erysipelotrichi; o__Erysipelotrichales; f__Erysipelotrichaceae; g__Catenibacterium; s__	0 ± 0	0.001 ± 0.001	x	x
196986	k__Bacteria; p__Firmicutes; c__Clostridia; o__Clostridiales; f__Lachnospiraceae; g__; s__	0 ± 0	0.001 ± 0	x	x
228748	k__Bacteria; p__Firmicutes; c__Clostridia; o__Clostridiales; f__Christensenellaceae; g__; s__	0 ± 0	0.001 ± 0.001	x	x
251243	k__Bacteria; p__Firmicutes; c__Bacilli; o__Lactobacillales; f__Leuconostocaceae; g__Leuconostoc; s__mesenteroides	0 ± 0	0.001 ± 0	x	x
306056	k__Bacteria; p__Firmicutes; c__Clostridia; o__Clostridiales; f__; g__; s__	0 ± 0	0.001 ± 0.001	x	x
311402	k__Bacteria; p__Firmicutes; c__Clostridia; o__Clostridiales; f__Clostridiaceae; g__Clostridium; s__hiranonis	0 ± 0	0.001 ± 0.001	x	x
317522	k__Bacteria; p__Firmicutes; c__Bacilli; o__Lactobacillales; f__Streptococcaceae; g__Lactococcus; s__	0 ± 0	0.001 ± 0	x	x
367946	k__Bacteria; p__Firmicutes; c__Clostridia; o__Clostridiales; f__Ruminococcaceae; g__; s__	0 ± 0	0.001 ± 0.001	x	x
484320	k__Bacteria; p__Actinobacteria; c__Actinobacteria; o__Actinomycetales; f__Actinomycetaceae; g__; s__	0 ± 0	0.001 ± 0.001	x	x
791348	k__Bacteria; p__Proteobacteria; c__Deltaproteobacteria; o__Desulfovibrionales; f__Desulfovibrionaceae; g__Desulfovibrio; s__D168	0 ± 0	0.001 ± 0.001	x	x
1078207	k__Bacteria; p__Firmicutes; c__Bacilli; o__Lactobacillales; f__Streptococcaceae; g__Streptococcus; s__	0 ± 0	0.001 ± 0	x	x
1141335	k__Bacteria; p__Proteobacteria; c__Epsilonproteobacteria; o__Campylobacterales; f__Helicobacteraceae; g__Helicobacter; s__	0 ± 0	0.001 ± 0	x	x
2124531	k__Bacteria; p__Firmicutes; c__Clostridia; o__Clostridiales; f__Lachnospiraceae; g__; s__	0 ± 0	0.001 ± 0	x	x
2177184	k__Bacteria; p__Firmicutes; c__Clostridia; o__Clostridiales; f__Lachnospiraceae; g__; s__	0 ± 0	0.001 ± 0	x	x
2574747	k__Bacteria; p__Proteobacteria; c__Gammaproteobacteria; o__Xanthomonadales; f__Xanthomonadaceae; g__; s__	0 ± 0	0.001 ± 0	x	x
2925620	k__Bacteria; p__Firmicutes; c__Clostridia; o__Clostridiales; f__Clostridiaceae; g__; s__	0 ± 0	0.001 ± 0	x	x
3013444	k__Bacteria; p__Bacteroidetes; c__Bacteroidia; o__Bacteroidales; f__; g__; s__	0 ± 0	0.001 ± 0	x	x
3205714	k__Bacteria; p__Firmicutes; c__Clostridia; o__Clostridiales; f__Lachnospiraceae; g__Dorea; s__	0 ± 0	0.001 ± 0.001	x	x
4028110	k__Bacteria; p__Proteobacteria; c__Gammaproteobacteria; o__Pseudomonadales; f__Pseudomonadaceae; g__Pseudomonas; s__	0 ± 0	0.001 ± 0.001	x	x
4302627	k__Bacteria; p__Bacteroidetes; c__Sphingobacteriia; o__Sphingobacteriales; f__Sphingobacteriaceae; g__; s__	0 ± 0	0.001 ± 0.001	x	x
4309831	k__Bacteria; p__Actinobacteria; c__Thermoleophilia; o__Solirubrobacterales; f__; g__; s__	0 ± 0	0.001 ± 0.001	x	x
4310675	k__Bacteria; p__Firmicutes; c__Clostridia; o__Clostridiales; f__; g__; s__	0 ± 0	0.001 ± 0.001	x	x
4317009	k__Bacteria; p__Firmicutes; c__Bacilli; o__Bacillales; f__Bacillaceae; g__Bacillus; s__	0 ± 0	0.001 ± 0.001	x	x
4346368	k__Bacteria; p__Bacteroidetes; c__Bacteroidia; o__Bacteroidales; f__Bacteroidaceae; g__Bacteroides; s__	0 ± 0	0.001 ± 0.001	x	x
4346490	k__Bacteria; p__Firmicutes; c__Clostridia; o__Clostridiales; f__Veillonellaceae; g__Dialister; s__	0 ± 0	0.001 ± 0.001	x	x
4374853	k__Bacteria; p__Firmicutes; c__Clostridia; o__Clostridiales; f__Clostridiaceae; g__; s__	0 ± 0	0.001 ± 0.001	x	x
4396688	k__Bacteria; p__Firmicutes; c__Clostridia; o__Clostridiales; f__Lachnospiraceae; g__[Ruminococcus]; s__	0 ± 0	0.001 ± 0	x	x
4444038	k__Bacteria; p__TM7; c__TM7-3; o__; f__; g__; s__	0 ± 0	0.001 ± 0	x	x
4453773	k__Bacteria; p__Proteobacteria; c__Deltaproteobacteria; o__Desulfovibrionales; f__Desulfovibrionaceae; g__Desulfovibrio; s__	0 ± 0	0.001 ± 0.001	x	x
4473883	k__Bacteria; p__Firmicutes; c__Bacilli; o__Lactobacillales; f__Streptococcaceae; g__Streptococcus; s__alactolyticus	0 ± 0	0.001 ± 0	x	x
146672	k__Bacteria; p__Firmicutes; c__Clostridia; o__Clostridiales; f__Lachnospiraceae; g__; s__	0.242 ± 0.094	0.433 ± 0.076	x	x
3275562	k__Bacteria; p__Firmicutes; c__Clostridia; o__Clostridiales; f__Lachnospiraceae; g__; s__	0.482 ± 0.255	0.051 ± 0.025	x	x
4473129	k__Bacteria; p__Proteobacteria; c__Gammaproteobacteria; o__Pasteurellales; f__Pasteurellaceae; g__Haemophilus; s__parainfluenzae	0.035 ± 0.024	0 ± 0	x	x
4256470	k__Bacteria; p__Bacteroidetes; c__Bacteroidia; o__Bacteroidales; f__Bacteroidaceae; g__Bacteroides; s__ovatus	0.356 ± 0.203	0.042 ± 0.031	x	x
191779	k__Bacteria; p__Firmicutes; c__Clostridia; o__Clostridiales; f__Lachnospiraceae; g__Blautia; s__	0.004 ± 0.002	0.001 ± 0.001	x	x
176300	k__Bacteria; p__Firmicutes; c__Clostridia; o__Clostridiales; f__Lachnospiraceae; g__Coprococcus; s__	0.001 ± 0.001	0.002 ± 0.001	x	x
4460021	k__Bacteria; p__Firmicutes; c__Clostridia; o__Clostridiales; f__Ruminococcaceae; g__Ruminococcus; s__	0.001 ± 0.001	0.002 ± 0.001	x	x
4455163	k__Bacteria; p__Bacteroidetes; c__Bacteroidia; o__Bacteroidales; f__Bacteroidaceae; g__Bacteroides; s__	0.202 ± 0.161	0.003 ± 0.001	x	x
329703	k__Bacteria; p__Firmicutes; c__Clostridia; o__Clostridiales; f__Lachnospiraceae; g__; s__	0.001 ± 0.001	0.002 ± 0.002	x	x
148279	k__Bacteria; p__Firmicutes; c__Clostridia; o__Clostridiales; f__Lachnospiraceae; g__Blautia; s__	0 ± 0	0.005 ± 0.003	x	x
188707	k__Bacteria; p__Firmicutes; c__Clostridia; o__Clostridiales; f__Ruminococcaceae; g__; s__	0.006 ± 0.003	0.001 ± 0.001	x	x
308598	k__Bacteria; p__Bacteroidetes; c__Bacteroidia; o__Bacteroidales; f__Bacteroidaceae; g__Bacteroides; s__ovatus	0.111 ± 0.078	0.003 ± 0.001	x	x
324163	k__Bacteria; p__Firmicutes; c__Clostridia; o__Clostridiales; f__Lachnospiraceae; g__Blautia; s__	0.002 ± 0.001	0.005 ± 0.001	x	x
176742	k__Bacteria; p__Firmicutes; c__Clostridia; o__Clostridiales; f__Lachnospiraceae; g__Blautia; s__	0.002 ± 0.001	0.005 ± 0.001	x	x
180414	k__Bacteria; p__Firmicutes; c__Clostridia; o__Clostridiales; f__Lachnospiraceae; g__Blautia; s__	0.013 ± 0.008	0.002 ± 0.001	x	x
3259606	k__Bacteria; p__Firmicutes; c__Clostridia; o__Clostridiales; f__Lachnospiraceae; g__[Ruminococcus]; s__	0.002 ± 0.002	0.011 ± 0.006	x	x
4463892	k__Bacteria; p__Bacteroidetes; c__Bacteroidia; o__Bacteroidales; f__Bacteroidaceae; g__Bacteroides; s__	1.195 ± 0.808	0.087 ± 0.038	x	x
4433947	k__Bacteria; p__Bacteroidetes; c__Bacteroidia; o__Bacteroidales; f__Bacteroidaceae; g__Bacteroides; s__	0.015 ± 0.011	0.001 ± 0.001	x	x
182574	k__Bacteria; p__Firmicutes; c__Clostridia; o__Clostridiales; f__Ruminococcaceae; g__; s__	0 ± 0	0.001 ± 0.001	x	x
193592	k__Bacteria; p__Firmicutes; c__Clostridia; o__Clostridiales; f__Lachnospiraceae; g__Blautia; s__	0 ± 0	0.001 ± 0.001	x	x
216710	k__Bacteria; p__Firmicutes; c__Clostridia; o__Clostridiales; f__Ruminococcaceae; g__; s__	0 ± 0	0.001 ± 0.001	x	x
519763	k__Bacteria; p__Firmicutes; c__Clostridia; o__Clostridiales; f__Ruminococcaceae; g__Oscillospira; s__	0 ± 0	0.001 ± 0.001	x	x
1870411	k__Bacteria; p__Firmicutes; c__Clostridia; o__Clostridiales; f__Clostridiaceae; g__; s__	0 ± 0	0.001 ± 0.001	x	x
3754926	k__Bacteria; p__Firmicutes; c__Clostridia; o__Clostridiales; f__Lachnospiraceae; g__; s__	0 ± 0	0.001 ± 0.001	x	x
3825765	k__Bacteria; p__Firmicutes; c__Clostridia; o__Clostridiales; f__Lachnospiraceae; g__; s__	0 ± 0	0.001 ± 0.001	x	x
4308496	k__Bacteria; p__Firmicutes; c__Clostridia; o__Clostridiales; f__Clostridiaceae; g__Clostridium; s__	0 ± 0	0.001 ± 0.001	x	x
4377418	k__Bacteria; p__Firmicutes; c__Clostridia; o__Clostridiales; f__[Tissierellaceae]; g__Parvimonas; s__	0 ± 0	0.001 ± 0.001	x	x
4480244	k__Bacteria; p__Firmicutes; c__Clostridia; o__Clostridiales; f__Veillonellaceae; g__Dialister; s__	0 ± 0	0.001 ± 0.001	x	x
190975	k__Bacteria; p__Bacteroidetes; c__Bacteroidia; o__Bacteroidales; f__[Barnesiellaceae]; g__; s__	0 ± 0	0.016 ± 0.015	x	x
2420110	k__Bacteria; p__Firmicutes; c__Clostridia; o__Clostridiales; f__Lachnospiraceae; g__; s__	0.009 ± 0.004	0.001 ± 0.001	x	x
196590	k__Bacteria; p__Firmicutes; c__Clostridia; o__Clostridiales; f__Ruminococcaceae; g__; s__	0.008 ± 0.007	0 ± 0	x	x
1959881	k__Bacteria; p__Firmicutes; c__Clostridia; o__Clostridiales; f__Clostridiaceae; g__; s__	0.005 ± 0.003	0.026 ± 0.014	x	x
4472130	k__Bacteria; p__Firmicutes; c__Clostridia; o__Clostridiales; f__Lachnospiraceae; g__; s__	0.006 ± 0.004	0.001 ± 0.001	x	x
182383	k__Bacteria; p__Firmicutes; c__Clostridia; o__Clostridiales; f__Ruminococcaceae; g__; s__	0.002 ± 0.001	0.001 ± 0	x	x
176244	k__Bacteria; p__Firmicutes; c__Clostridia; o__Clostridiales; f__Lachnospiraceae; g__Blautia; s__	0.001 ± 0	0.003 ± 0.001	x	x
179971	k__Bacteria; p__Firmicutes; c__Clostridia; o__Clostridiales; f__Lachnospiraceae; g__Blautia; s__	0.016 ± 0.007	0.036 ± 0.01	x	x
365536	k__Bacteria; p__Firmicutes; c__Clostridia; o__Clostridiales; f__Ruminococcaceae; g__Oscillospira; s__	0.027 ± 0.018	0.003 ± 0.001	x	x
180702	k__Bacteria; p__Firmicutes; c__Clostridia; o__Clostridiales; f__Ruminococcaceae; g__; s__	0.15 ± 0.087	0.018 ± 0.006	x	x
2167415	k__Bacteria; p__Firmicutes; c__Clostridia; o__Clostridiales; f__Clostridiaceae; g__; s__	0.001 ± 0.001	0.007 ± 0.004	x	x
158649	k__Bacteria; p__Firmicutes; c__Clostridia; o__Clostridiales; f__Ruminococcaceae; g__; s__	0.001 ± 0.001	0 ± 0	x	x
176785	k__Bacteria; p__Firmicutes; c__Clostridia; o__Clostridiales; f__Ruminococcaceae; g__; s__	0.001 ± 0.001	0 ± 0	x	x
178485	k__Bacteria; p__Firmicutes; c__Clostridia; o__Clostridiales; f__Ruminococcaceae; g__; s__	0.001 ± 0.001	0 ± 0	x	x
179785	k__Bacteria; p__Firmicutes; c__Clostridia; o__Clostridiales; f__; g__; s__	0.001 ± 0.001	0 ± 0	x	x
180171	k__Bacteria; p__Firmicutes; c__Clostridia; o__Clostridiales; f__Lachnospiraceae; g__; s__	0.001 ± 0.001	0 ± 0	x	x
186289	k__Bacteria; p__Firmicutes; c__Clostridia; o__Clostridiales; f__Clostridiaceae; g__Clostridium; s__	0.001 ± 0.001	0 ± 0	x	x
186463	k__Bacteria; p__Firmicutes; c__Clostridia; o__Clostridiales; f__Ruminococcaceae; g__; s__	0.001 ± 0.001	0 ± 0	x	x
196176	k__Bacteria; p__Firmicutes; c__Clostridia; o__Clostridiales; f__Lachnospiraceae; g__Dorea; s__	0.001 ± 0.001	0 ± 0	x	x
198034	k__Bacteria; p__Firmicutes; c__Clostridia; o__Clostridiales; f__Lachnospiraceae; g__Lachnospira; s__	0.001 ± 0.001	0 ± 0	x	x
301149	k__Bacteria; p__Proteobacteria; c__Gammaproteobacteria; o__Enterobacteriales; f__Enterobacteriaceae; g__; s__	0.001 ± 0	0 ± 0	x	x
4346675	k__Bacteria; p__Firmicutes; c__Clostridia; o__Clostridiales; f__Ruminococcaceae; g__; s__	0.001 ± 0.001	0 ± 0	x	x
4371463	k__Bacteria; p__Firmicutes; c__Clostridia; o__Clostridiales; f__Lachnospiraceae; g__; s__	0.001 ± 0.001	0 ± 0	x	x
4479397	k__Bacteria; p__Bacteroidetes; c__Bacteroidia; o__Bacteroidales; f__Bacteroidaceae; g__Bacteroides; s__fragilis	0.001 ± 0.001	0 ± 0	x	x
780650	k__Bacteria; p__Firmicutes; c__Clostridia; o__Clostridiales; f__Clostridiaceae; g__; s__	0.001 ± 0.001	0.011 ± 0.008	x	x
3251419	k__Bacteria; p__Firmicutes; c__Clostridia; o__Clostridiales; f__Lachnospiraceae; g__; s__	0.037 ± 0.035	0.001 ± 0.001	x	x
4455308	k__Bacteria; p__Firmicutes; c__Clostridia; o__Clostridiales; f__Lachnospiraceae; g__; s__	0.139 ± 0.074	0.014 ± 0.005	x	x
4482598	k__Bacteria; p__Proteobacteria; c__Gammaproteobacteria; o__Pseudomonadales; f__Moraxellaceae; g__Acinetobacter; s__	0.001 ± 0.001	0.008 ± 0.005	x	x
181575	k__Bacteria; p__Firmicutes; c__Clostridia; o__Clostridiales; f__Ruminococcaceae; g__Faecalibacterium; s__prausnitzii	0.019 ± 0.012	0.003 ± 0.002	x	x
185951	k__Bacteria; p__Firmicutes; c__Clostridia; o__Clostridiales; f__Lachnospiraceae; g__Blautia; s__	0.009 ± 0.003	0.017 ± 0.004	x	x
3973322	k__Bacteria; p__Firmicutes; c__Clostridia; o__Clostridiales; f__; g__; s__	0.001 ± 0.001	0.009 ± 0.005	x	x
187702	k__Bacteria; p__Firmicutes; c__Clostridia; o__Clostridiales; f__Lachnospiraceae; g__Blautia; s__	0.004 ± 0.001	0.02 ± 0.011	x	x
185136	k__Bacteria; p__Firmicutes; c__Clostridia; o__Clostridiales; f__Ruminococcaceae; g__; s__	0.024 ± 0.012	0.007 ± 0.004	x	x
318970	k__Bacteria; p__Firmicutes; c__Clostridia; o__Clostridiales; f__Lachnospiraceae; g__Blautia; s__	0.003 ± 0.001	0.007 ± 0.003	x	x
186888	k__Bacteria; p__Firmicutes; c__Clostridia; o__Clostridiales; f__Lachnospiraceae; g__; s__	0.026 ± 0.014	0.004 ± 0.002	x	x
4381092	k__Bacteria; p__Firmicutes; c__Clostridia; o__Clostridiales; f__Clostridiaceae; g__; s__	0.006 ± 0.004	0.031 ± 0.017	x	x
183043	k__Bacteria; p__Firmicutes; c__Clostridia; o__Clostridiales; f__Ruminococcaceae; g__; s__	0.004 ± 0.002	0.001 ± 0.001	x	x
190169	k__Bacteria; p__Firmicutes; c__Clostridia; o__Clostridiales; f__Ruminococcaceae; g__Faecalibacterium; s__prausnitzii	0.01 ± 0.005	0.002 ± 0.001	x	x
180553	k__Bacteria; p__Firmicutes; c__Clostridia; o__Clostridiales; f__Lachnospiraceae; g__[Ruminococcus]; s__	0.001 ± 0.001	0.005 ± 0.003	x	x
350681	k__Bacteria; p__Firmicutes; c__Clostridia; o__Clostridiales; f__Ruminococcaceae; g__; s__	0.009 ± 0.003	0.003 ± 0.001	x	x
4339831	k__Bacteria; p__Firmicutes; c__Clostridia; o__Clostridiales; f__Lachnospiraceae; g__Roseburia; s__faecis	0.012 ± 0.007	0.003 ± 0.001	x	x
4388775	k__Bacteria; p__Firmicutes; c__Clostridia; o__Clostridiales; f__Veillonellaceae; g__Veillonella; s__dispar	0.18 ± 0.141	0.015 ± 0.008	x	x
4378683	k__Bacteria; p__Firmicutes; c__Clostridia; o__Clostridiales; f__Lachnospiraceae; g__; s__	0.029 ± 0.015	0.003 ± 0.002	x	x
185165	k__Bacteria; p__Firmicutes; c__Clostridia; o__Clostridiales; f__Lachnospiraceae; g__[Ruminococcus]; s__	0.002 ± 0.002	0.011 ± 0.005	x	x
328544	k__Bacteria; p__Firmicutes; c__Clostridia; o__Clostridiales; f__Ruminococcaceae; g__; s__	0.002 ± 0.001	0 ± 0	x	x
367176	k__Bacteria; p__Firmicutes; c__Clostridia; o__Clostridiales; f__Ruminococcaceae; g__Oscillospira; s__	0.129 ± 0.083	0.003 ± 0.001	x	x
183651	k__Bacteria; p__Firmicutes; c__Clostridia; o__Clostridiales; f__Lachnospiraceae; g__Blautia; s__	0.007 ± 0.002	0.003 ± 0.002	x	x
360636	k__Bacteria; p__Firmicutes; c__Erysipelotrichi; o__Erysipelotrichales; f__Erysipelotrichaceae; g__; s__	0.003 ± 0.003	0.165 ± 0.128	x	x
516022	k__Bacteria; p__Firmicutes; c__Erysipelotrichi; o__Erysipelotrichales; f__Erysipelotrichaceae; g__; s__	0.061 ± 0.048	0.005 ± 0.002	x	x
2189140	k__Bacteria; p__Bacteroidetes; c__Bacteroidia; o__Bacteroidales; f__Bacteroidaceae; g__Bacteroides; s__	0 ± 0	0.005 ± 0.003	x	x
2688034	k__Bacteria; p__Firmicutes; c__Clostridia; o__Clostridiales; f__Lachnospiraceae; g__; s__	0.012 ± 0.008	0.001 ± 0.001	x	x
3562626	k__Bacteria; p__Bacteroidetes; c__Bacteroidia; o__Bacteroidales; f__Bacteroidaceae; g__Bacteroides; s__	0 ± 0	0.004 ± 0.003	x	x
194151	k__Bacteria; p__Firmicutes; c__Clostridia; o__Clostridiales; f__; g__; s__	0.005 ± 0.003	0.014 ± 0.005	x	x
366641	k__Bacteria; p__Firmicutes; c__Clostridia; o__Clostridiales; f__Lachnospiraceae; g__Blautia; s__	0.001 ± 0.001	0.003 ± 0.001	x	x
163494	k__Bacteria; p__Firmicutes; c__Clostridia; o__Clostridiales; f__Lachnospiraceae; g__; s__	0.004 ± 0.003	0.025 ± 0.013	x	x
193621	k__Bacteria; p__Firmicutes; c__Clostridia; o__Clostridiales; f__Lachnospiraceae; g__Coprococcus; s__	0.059 ± 0.025	0.145 ± 0.053	x	x
356827	k__Bacteria; p__Bacteroidetes; c__Bacteroidia; o__Bacteroidales; f__Bacteroidaceae; g__Bacteroides; s__	0.004 ± 0.004	0.039 ± 0.028	x	x
824876	k__Bacteria; p__Actinobacteria; c__Actinobacteria; o__Bifidobacteriales; f__Bifidobacteriaceae; g__Bifidobacterium; s__	0.001 ± 0.001	0.006 ± 0.003	x	x
1602805	k__Bacteria; p__Firmicutes; c__Clostridia; o__Clostridiales; f__Lachnospiraceae; g__; s__	0.003 ± 0.001	0.001 ± 0.001	x	x
279107	k__Bacteria; p__Firmicutes; c__Clostridia; o__Clostridiales; f__Lachnospiraceae; g__Anaerostipes; s__	0 ± 0	0.012 ± 0.01	x	x
199643	k__Bacteria; p__Firmicutes; c__Clostridia; o__Clostridiales; f__Lachnospiraceae; g__Roseburia; s__	0.001 ± 0.001	0.002 ± 0.001	x	x
336063	k__Bacteria; p__Firmicutes; c__Clostridia; o__Clostridiales; f__Ruminococcaceae; g__; s__	0.001 ± 0.001	0.002 ± 0.001	x	x
372348	k__Bacteria; p__Firmicutes; c__Clostridia; o__Clostridiales; f__Ruminococcaceae; g__Ruminococcus; s__	0.001 ± 0	0.002 ± 0.001	x	x
1811927	k__Bacteria; p__Actinobacteria; c__Coriobacteriia; o__Coriobacteriales; f__Coriobacteriaceae; g__Collinsella; s__aerofaciens	0.001 ± 0.001	0.002 ± 0.001	x	x
3713805	k__Bacteria; p__Firmicutes; c__Clostridia; o__Clostridiales; f__Lachnospiraceae; g__Roseburia; s__	0.001 ± 0	0.002 ± 0.001	x	x
195436	k__Bacteria; p__Firmicutes; c__Clostridia; o__Clostridiales; f__Ruminococcaceae; g__; s__	0.006 ± 0.003	0.002 ± 0.001	x	x
4422456	k__Bacteria; p__Firmicutes; c__Clostridia; o__Clostridiales; f__Veillonellaceae; g__Veillonella; s__dispar	0.061 ± 0.047	0.005 ± 0.003	x	x
4481427	k__Bacteria; p__Firmicutes; c__Clostridia; o__Clostridiales; f__Lachnospiraceae; g__Roseburia; s__	0.196 ± 0.106	0.579 ± 0.25	x	x
192566	k__Bacteria; p__Firmicutes; c__Clostridia; o__Clostridiales; f__Ruminococcaceae; g__Faecalibacterium; s__prausnitzii	0.006 ± 0.005	0.001 ± 0	x	x
3734841	k__Bacteria; p__Firmicutes; c__Clostridia; o__Clostridiales; f__Clostridiaceae; g__; s__	0.002 ± 0.001	0.006 ± 0.003	x	x
183064	k__Bacteria; p__Firmicutes; c__Clostridia; o__Clostridiales; f__Lachnospiraceae; g__; s__	0.005 ± 0.002	0.01 ± 0.003	x	x
345158	k__Bacteria; p__Firmicutes; c__Clostridia; o__Clostridiales; f__; g__; s__	0.001 ± 0.001	0.002 ± 0.001	x	x
3857426	k__Bacteria; p__Firmicutes; c__Clostridia; o__Clostridiales; f__Lachnospiraceae; g__; s__	0.002 ± 0.001	0 ± 0	x	x
4482516	k__Bacteria; p__Firmicutes; c__Clostridia; o__Clostridiales; f__Clostridiaceae; g__; s__	0.001 ± 0.001	0.01 ± 0.005	x	x
174010	k__Bacteria; p__Firmicutes; c__Clostridia; o__Clostridiales; f__; g__; s__	0.004 ± 0.003	0 ± 0	x	x
179319	k__Bacteria; p__Firmicutes; c__Clostridia; o__Clostridiales; f__Lachnospiraceae; g__Dorea; s__	0.016 ± 0.005	0.007 ± 0.003	x	x
193654	k__Bacteria; p__Firmicutes; c__Clostridia; o__Clostridiales; f__Lachnospiraceae; g__; s__	0.005 ± 0.003	0.001 ± 0	x	x
560873	k__Bacteria; p__Firmicutes; c__Clostridia; o__Clostridiales; f__; g__; s__	0 ± 0	0.013 ± 0.012	x	x
187401	k__Bacteria; p__Firmicutes; c__Clostridia; o__Clostridiales; f__Ruminococcaceae; g__; s__	0.138 ± 0.078	0.019 ± 0.005	x	x
177111	k__Bacteria; p__Firmicutes; c__Clostridia; o__Clostridiales; f__Lachnospiraceae; g__Coprococcus; s__	0.004 ± 0.002	0.001 ± 0.001	x	x
195374	k__Bacteria; p__Firmicutes; c__Clostridia; o__Clostridiales; f__; g__; s__	0.005 ± 0.003	0.001 ± 0	x	x
540079	k__Bacteria; p__Firmicutes; c__Clostridia; o__Clostridiales; f__; g__; s__	0.001 ± 0.001	0.006 ± 0.004	x	x
45363	k__Bacteria; p__Firmicutes; c__Erysipelotrichi; o__Erysipelotrichales; f__Erysipelotrichaceae; g__; s__	0.001 ± 0.001	0 ± 0	x	x
158027	k__Bacteria; p__Firmicutes; c__Clostridia; o__Clostridiales; f__Ruminococcaceae; g__Oscillospira; s__	0.001 ± 0.001	0 ± 0	x	x
179692	k__Bacteria; p__Firmicutes; c__Clostridia; o__Clostridiales; f__Ruminococcaceae; g__; s__	0.001 ± 0.001	0 ± 0	x	x
180215	k__Bacteria; p__Firmicutes; c__Clostridia; o__Clostridiales; f__Lachnospiraceae; g__[Ruminococcus]; s__gnavus	0.001 ± 0	0 ± 0	x	x
182224	k__Bacteria; p__Firmicutes; c__Clostridia; o__Clostridiales; f__Ruminococcaceae; g__; s__	0.001 ± 0	0 ± 0	x	x
185864	k__Bacteria; p__Firmicutes; c__Clostridia; o__Clostridiales; f__Lachnospiraceae; g__; s__	0.001 ± 0.001	0 ± 0	x	x
186262	k__Bacteria; p__Firmicutes; c__Clostridia; o__Clostridiales; f__Lachnospiraceae; g__; s__	0.001 ± 0	0 ± 0	x	x
189797	k__Bacteria; p__Firmicutes; c__Clostridia; o__Clostridiales; f__Lachnospiraceae; g__Coprococcus; s__	0.001 ± 0.001	0 ± 0	x	x
191695	k__Bacteria; p__Firmicutes; c__Clostridia; o__Clostridiales; f__Ruminococcaceae; g__; s__	0.001 ± 0.001	0 ± 0	x	x
195203	k__Bacteria; p__Firmicutes; c__Clostridia; o__Clostridiales; f__Lachnospiraceae; g__; s__	0.001 ± 0	0 ± 0	x	x
338994	k__Bacteria; p__Firmicutes; c__Clostridia; o__Clostridiales; f__; g__; s__	0.001 ± 0.001	0 ± 0	x	x
343378	k__Bacteria; p__Firmicutes; c__Clostridia; o__Clostridiales; f__; g__; s__	0.001 ± 0.001	0 ± 0	x	x
1749079	k__Bacteria; p__Bacteroidetes; c__Bacteroidia; o__Bacteroidales; f__Bacteroidaceae; g__Bacteroides; s__	0.001 ± 0.001	0 ± 0	x	x
2565100	k__Bacteria; p__Firmicutes; c__Clostridia; o__Clostridiales; f__Lachnospiraceae; g__; s__	0.001 ± 0.001	0 ± 0	x	x
176080	k__Bacteria; p__Firmicutes; c__Clostridia; o__Clostridiales; f__Lachnospiraceae; g__; s__	0.001 ± 0.001	0.006 ± 0.003	x	x
183207	k__Bacteria; p__Firmicutes; c__Clostridia; o__Clostridiales; f__Ruminococcaceae; g__; s__	0.006 ± 0.003	0.015 ± 0.005	x	x
188832	k__Bacteria; p__Firmicutes; c__Clostridia; o__Clostridiales; f__; g__; s__	0.002 ± 0.001	0.001 ± 0.001	x	x
194758	k__Bacteria; p__Firmicutes; c__Clostridia; o__Clostridiales; f__Lachnospiraceae; g__Coprococcus; s__	0.002 ± 0.001	0.001 ± 0	x	x
470117	k__Bacteria; p__Firmicutes; c__Clostridia; o__Clostridiales; f__Ruminococcaceae; g__; s__	0.002 ± 0.001	0.001 ± 0.001	x	x
3376513	k__Bacteria; p__Firmicutes; c__Clostridia; o__Clostridiales; f__Lachnospiraceae; g__[Ruminococcus]; s__gnavus	0.002 ± 0.001	0.001 ± 0	x	x
174763	k__Bacteria; p__Firmicutes; c__Clostridia; o__Clostridiales; f__Lachnospiraceae; g__Blautia; s__	0.009 ± 0.004	0.019 ± 0.006	x	x
184114	k__Bacteria; p__Firmicutes; c__Clostridia; o__Clostridiales; f__Ruminococcaceae; g__; s__	0.035 ± 0.02	0.009 ± 0.004	x	x
198117	k__Bacteria; p__Firmicutes; c__Clostridia; o__Clostridiales; f__Lachnospiraceae; g__; s__	0.022 ± 0.016	0.003 ± 0.002	x	x
198956	k__Bacteria; p__Firmicutes; c__Clostridia; o__Clostridiales; f__Ruminococcaceae; g__Faecalibacterium; s__prausnitzii	0.004 ± 0.002	0.001 ± 0.001	x	x
2990145	k__Bacteria; p__Firmicutes; c__Clostridia; o__Clostridiales; f__Lachnospiraceae; g__; s__	0.029 ± 0.017	0.003 ± 0.001	x	x
176197	k__Bacteria; p__Firmicutes; c__Clostridia; o__Clostridiales; f__; g__; s__	0.121 ± 0.039	0.263 ± 0.09	x	x
255359	k__Bacteria; p__Firmicutes; c__Bacilli; o__Lactobacillales; f__Streptococcaceae; g__Streptococcus; s__	0 ± 0	0.101 ± 0.074	x	x
176664	k__Bacteria; p__Firmicutes; c__Clostridia; o__Clostridiales; f__Lachnospiraceae; g__; s__	0.007 ± 0.005	0 ± 0	x	x
192963	k__Bacteria; p__Verrucomicrobia; c__Verrucomicrobiae; o__Verrucomicrobiales; f__Verrucomicrobiaceae; g__Akkermansia; s__muciniphila	0 ± 0	0.133 ± 0.132	x	x
171184	k__Bacteria; p__Firmicutes; c__Clostridia; o__Clostridiales; f__Clostridiaceae; g__; s__	0 ± 0	0.003 ± 0.002	x	x
299474	k__Bacteria; p__Firmicutes; c__Clostridia; o__Clostridiales; f__Clostridiaceae; g__; s__	0.003 ± 0.002	0.009 ± 0.003	x	x
4442899	k__Bacteria; p__Firmicutes; c__Clostridia; o__Clostridiales; f__; g__; s__	0 ± 0	0.011 ± 0.007	x	x
166869	k__Bacteria; p__Firmicutes; c__Clostridia; o__Clostridiales; f__; g__; s__	0.012 ± 0.007	0.001 ± 0	x	x
178920	k__Bacteria; p__Firmicutes; c__Clostridia; o__Clostridiales; f__; g__; s__	0.018 ± 0.008	0.005 ± 0.002	x	x
3387754	k__Bacteria; p__Firmicutes; c__Clostridia; o__Clostridiales; f__Lachnospiraceae; g__Roseburia; s__faecis	0.013 ± 0.007	0.003 ± 0.002	x	x
169515	k__Bacteria; p__Firmicutes; c__Clostridia; o__Clostridiales; f__; g__; s__	0 ± 0	0.006 ± 0.005	x	x
186248	k__Bacteria; p__Firmicutes; c__Clostridia; o__Clostridiales; f__Ruminococcaceae; g__; s__	0.045 ± 0.02	0.015 ± 0.005	x	x
4473509	k__Bacteria; p__Firmicutes; c__Clostridia; o__Clostridiales; f__Lachnospiraceae; g__; s__	0.133 ± 0.078	0.016 ± 0.011	x	x
177561	k__Bacteria; p__Firmicutes; c__Clostridia; o__Clostridiales; f__Ruminococcaceae; g__; s__	0.085 ± 0.033	0.034 ± 0.019	x	x
190320	k__Bacteria; p__Firmicutes; c__Clostridia; o__Clostridiales; f__Lachnospiraceae; g__; s__	0.469 ± 0.274	0.11 ± 0.052	x	x
358781	k__Bacteria; p__Firmicutes; c__Clostridia; o__Clostridiales; f__Ruminococcaceae; g__; s__	0.455 ± 0.269	0.092 ± 0.071	x	x
182089	k__Bacteria; p__Firmicutes; c__Clostridia; o__Clostridiales; f__Ruminococcaceae; g__; s__	0.006 ± 0.004	0.001 ± 0	x	x
182413	k__Bacteria; p__Firmicutes; c__Clostridia; o__Clostridiales; f__Lachnospiraceae; g__Blautia; s__	0.003 ± 0.001	0.009 ± 0.004	x	x
1130824	k__Bacteria; p__Firmicutes; c__Bacilli; o__Lactobacillales; f__Streptococcaceae; g__Lactococcus; s__	0 ± 0	0.005 ± 0.004	x	x
1823053	k__Bacteria; p__Firmicutes; c__Bacilli; o__Lactobacillales; f__Streptococcaceae; g__Lactococcus; s__	0 ± 0	0.004 ± 0.004	x	x
4364747	k__Bacteria; p__Firmicutes; c__Clostridia; o__Clostridiales; f__Clostridiaceae; g__; s__	0 ± 0	0.004 ± 0.003	x	x
180216	k__Bacteria; p__Firmicutes; c__Clostridia; o__Clostridiales; f__Lachnospiraceae; g__; s__	0.002 ± 0.001	0.01 ± 0.007	x	x
181698	k__Bacteria; p__Firmicutes; c__Clostridia; o__Clostridiales; f__Lachnospiraceae; g__; s__	0.004 ± 0.002	0.001 ± 0	x	x
183385	k__Bacteria; p__Firmicutes; c__Clostridia; o__Clostridiales; f__Ruminococcaceae; g__; s__	0.002 ± 0.001	0.004 ± 0.001	x	x
327598	k__Bacteria; p__Firmicutes; c__Clostridia; o__Clostridiales; f__Christensenellaceae; g__; s__	0 ± 0	0.007 ± 0.007	x	x
357930	k__Bacteria; p__Firmicutes; c__Clostridia; o__Clostridiales; f__Veillonellaceae; g__Dialister; s__	0 ± 0	0.02 ± 0.019	x	x
3931537	k__Bacteria; p__Firmicutes; c__Clostridia; o__Clostridiales; f__Clostridiaceae; g__Clostridium; s__	0.751 ± 0.308	0.273 ± 0.092	x	x
25005	k__Bacteria; p__Firmicutes; c__Clostridia; o__Clostridiales; f__Lachnospiraceae; g__; s__	0 ± 0	0 ± 0	x	x
44151	k__Bacteria; p__Firmicutes; c__Clostridia; o__Clostridiales; f__Ruminococcaceae; g__; s__	0 ± 0	0 ± 0	x	x
62513	k__Bacteria; p__Firmicutes; c__Clostridia; o__Clostridiales; f__Lachnospiraceae; g__Moryella; s__indoligenes	0 ± 0	0 ± 0	x	x
138179	k__Bacteria; p__Bacteroidetes; c__Bacteroidia; o__Bacteroidales; f__Porphyromonadaceae; g__Porphyromonas; s__	0 ± 0	0 ± 0	x	x
146586	k__Bacteria; p__Firmicutes; c__Clostridia; o__Clostridiales; f__Ruminococcaceae; g__Oscillospira; s__	0 ± 0	0 ± 0	x	x
148352	k__Bacteria; p__Firmicutes; c__Clostridia; o__Clostridiales; f__Ruminococcaceae; g__; s__	0 ± 0	0 ± 0	x	x
148987	k__Bacteria; p__Firmicutes; c__Clostridia; o__Clostridiales; f__Lachnospiraceae; g__[Ruminococcus]; s__torques	0 ± 0	0 ± 0	x	x
157966	k__Bacteria; p__Firmicutes; c__Clostridia; o__Clostridiales; f__Ruminococcaceae; g__; s__	0 ± 0	0 ± 0	x	x
161423	k__Bacteria; p__Bacteroidetes; c__Bacteroidia; o__Bacteroidales; f__Bacteroidaceae; g__Bacteroides; s__	0 ± 0	0 ± 0	x	x
164744	k__Bacteria; p__Firmicutes; c__Clostridia; o__Clostridiales; f__; g__; s__	0 ± 0	0 ± 0	x	x
173192	k__Bacteria; p__Firmicutes; c__Clostridia; o__Clostridiales; f__Lachnospiraceae; g__[Ruminococcus]; s__gnavus	0 ± 0	0 ± 0	x	x
174043	k__Bacteria; p__Firmicutes; c__Clostridia; o__Clostridiales; f__Lachnospiraceae; g__Blautia; s__	0 ± 0	0 ± 0	x	x
174360	k__Bacteria; p__Firmicutes; c__Clostridia; o__Clostridiales; f__Lachnospiraceae; g__[Ruminococcus]; s__gnavus	0 ± 0	0 ± 0	x	x
175323	k__Bacteria; p__Firmicutes; c__Clostridia; o__Clostridiales; f__; g__; s__	0 ± 0	0 ± 0	x	x
175630	k__Bacteria; p__Firmicutes; c__Clostridia; o__Clostridiales; f__Ruminococcaceae; g__; s__	0 ± 0	0 ± 0	x	x
175633	k__Bacteria; p__Firmicutes; c__Clostridia; o__Clostridiales; f__Ruminococcaceae; g__; s__	0 ± 0	0 ± 0	x	x
176077	k__Bacteria; p__Firmicutes; c__Clostridia; o__Clostridiales; f__; g__; s__	0 ± 0	0 ± 0	x	x
176947	k__Bacteria; p__Firmicutes; c__Clostridia; o__Clostridiales; f__Ruminococcaceae; g__; s__	0 ± 0	0 ± 0	x	x
177228	k__Bacteria; p__Firmicutes; c__Clostridia; o__Clostridiales; f__Clostridiaceae; g__; s__	0 ± 0	0 ± 0	x	x
177484	k__Bacteria; p__Firmicutes; c__Clostridia; o__Clostridiales; f__Veillonellaceae; g__; s__	0 ± 0	0 ± 0	x	x
178001	k__Bacteria; p__Firmicutes; c__Clostridia; o__Clostridiales; f__Lachnospiraceae; g__Lachnospira; s__	0 ± 0	0 ± 0	x	x
178012	k__Bacteria; p__Firmicutes; c__Clostridia; o__Clostridiales; f__Lachnospiraceae; g__; s__	0 ± 0	0 ± 0	x	x
178859	k__Bacteria; p__Firmicutes; c__Clostridia; o__Clostridiales; f__Ruminococcaceae; g__Ruminococcus; s__	0 ± 0	0 ± 0	x	x
179402	k__Bacteria; p__Firmicutes; c__Clostridia; o__Clostridiales; f__Ruminococcaceae; g__; s__	0 ± 0	0 ± 0	x	x
179647	k__Bacteria; p__Firmicutes; c__Clostridia; o__Clostridiales; f__Ruminococcaceae; g__Ruminococcus; s__	0 ± 0	0 ± 0	x	x
179861	k__Bacteria; p__Firmicutes; c__Clostridia; o__Clostridiales; f__; g__; s__	0 ± 0	0 ± 0	x	x
181155	k__Bacteria; p__Firmicutes; c__Clostridia; o__Clostridiales; f__Ruminococcaceae; g__; s__	0 ± 0	0 ± 0	x	x
181226	k__Bacteria; p__Firmicutes; c__Clostridia; o__Clostridiales; f__Lachnospiraceae; g__Blautia; s__	0 ± 0	0 ± 0	x	x
181432	k__Bacteria; p__Bacteroidetes; c__Bacteroidia; o__Bacteroidales; f__[Paraprevotellaceae]; g__Paraprevotella; s__	0 ± 0	0 ± 0	x	x
181537	k__Bacteria; p__Firmicutes; c__Clostridia; o__Clostridiales; f__; g__; s__	0 ± 0	0 ± 0	x	x
182456	k__Bacteria; p__Firmicutes; c__Clostridia; o__Clostridiales; f__Lachnospiraceae; g__Lachnospira; s__	0 ± 0	0 ± 0	x	x
182600	k__Bacteria; p__Firmicutes; c__Clostridia; o__Clostridiales; f__Ruminococcaceae; g__Oscillospira; s__	0 ± 0	0 ± 0	x	x
183450	k__Bacteria; p__Firmicutes; c__Clostridia; o__Clostridiales; f__; g__; s__	0 ± 0	0 ± 0	x	x
183576	k__Bacteria; p__Firmicutes; c__Clostridia; o__Clostridiales; f__Lachnospiraceae; g__; s__	0 ± 0	0 ± 0	x	x
185088	k__Bacteria; p__Firmicutes; c__Clostridia; o__Clostridiales; f__Lachnospiraceae; g__[Ruminococcus]; s__gnavus	0 ± 0	0 ± 0	x	x
185354	k__Bacteria; p__Firmicutes; c__Clostridia; o__Clostridiales; f__Lachnospiraceae; g__; s__	0 ± 0	0 ± 0	x	x
185603	k__Bacteria; p__Firmicutes; c__Clostridia; o__Clostridiales; f__Lachnospiraceae; g__Dorea; s__	0 ± 0	0 ± 0	x	x
185652	k__Bacteria; p__Firmicutes; c__Clostridia; o__Clostridiales; f__; g__; s__	0 ± 0	0 ± 0	x	x
186652	k__Bacteria; p__Firmicutes; c__Clostridia; o__Clostridiales; f__Lachnospiraceae; g__Dorea; s__formicigenerans	0 ± 0	0 ± 0	x	x
186974	k__Bacteria; p__Bacteroidetes; c__Bacteroidia; o__Bacteroidales; f__Prevotellaceae; g__Prevotella; s__copri	0 ± 0	0 ± 0	x	x
187594	k__Bacteria; p__Firmicutes; c__Clostridia; o__Clostridiales; f__Lachnospiraceae; g__; s__	0 ± 0	0 ± 0	x	x
187665	k__Bacteria; p__Firmicutes; c__Clostridia; o__Clostridiales; f__Lachnospiraceae; g__; s__	0 ± 0	0 ± 0	x	x
188037	k__Bacteria; p__Firmicutes; c__Clostridia; o__Clostridiales; f__Lachnospiraceae; g__Blautia; s__	0 ± 0	0 ± 0	x	x
188282	k__Bacteria; p__Firmicutes; c__Clostridia; o__Clostridiales; f__Clostridiaceae; g__; s__	0 ± 0	0 ± 0	x	x
189924	k__Bacteria; p__Firmicutes; c__Clostridia; o__Clostridiales; f__Ruminococcaceae; g__; s__	0 ± 0	0 ± 0	x	x
189925	k__Bacteria; p__Firmicutes; c__Clostridia; o__Clostridiales; f__; g__; s__	0 ± 0	0 ± 0	x	x
191874	k__Bacteria; p__Firmicutes; c__Clostridia; o__Clostridiales; f__Ruminococcaceae; g__Ruminococcus; s__	0 ± 0	0 ± 0	x	x
192046	k__Bacteria; p__Firmicutes; c__Clostridia; o__Clostridiales; f__Ruminococcaceae; g__; s__	0 ± 0	0 ± 0	x	x
192133	k__Bacteria; p__Firmicutes; c__Clostridia; o__Clostridiales; f__Lachnospiraceae; g__; s__	0 ± 0	0 ± 0	x	x
192641	k__Bacteria; p__Firmicutes; c__Clostridia; o__Clostridiales; f__Lachnospiraceae; g__; s__	0 ± 0	0 ± 0	x	x
192741	k__Bacteria; p__Firmicutes; c__Clostridia; o__Clostridiales; f__; g__; s__	0 ± 0	0 ± 0	x	x
193053	k__Bacteria; p__Firmicutes; c__Clostridia; o__Clostridiales; f__Ruminococcaceae; g__; s__	0 ± 0	0 ± 0	x	x
193125	k__Bacteria; p__Firmicutes; c__Clostridia; o__Clostridiales; f__Lachnospiraceae; g__Blautia; s__producta	0 ± 0	0 ± 0	x	x
194008	k__Bacteria; p__Firmicutes; c__Clostridia; o__Clostridiales; f__Lachnospiraceae; g__Coprococcus; s__	0 ± 0	0 ± 0	x	x
194089	k__Bacteria; p__Firmicutes; c__Clostridia; o__Clostridiales; f__; g__; s__	0 ± 0	0 ± 0	x	x
194670	k__Bacteria; p__Bacteroidetes; c__Bacteroidia; o__Bacteroidales; f__Bacteroidaceae; g__Bacteroides; s__	0 ± 0	0 ± 0	x	x
196191	k__Bacteria; p__Firmicutes; c__Clostridia; o__Clostridiales; f__Ruminococcaceae; g__Oscillospira; s__	0 ± 0	0 ± 0	x	x
196572	k__Bacteria; p__Firmicutes; c__Clostridia; o__Clostridiales; f__; g__; s__	0 ± 0	0 ± 0	x	x
196581	k__Bacteria; p__Firmicutes; c__Clostridia; o__Clostridiales; f__Lachnospiraceae; g__; s__	0 ± 0	0 ± 0	x	x
196731	k__Bacteria; p__Firmicutes; c__Clostridia; o__Clostridiales; f__; g__; s__	0 ± 0	0 ± 0	x	x
196854	k__Bacteria; p__Firmicutes; c__Clostridia; o__Clostridiales; f__Lachnospiraceae; g__; s__	0 ± 0	0 ± 0	x	x
197099	k__Bacteria; p__Firmicutes; c__Clostridia; o__Clostridiales; f__Ruminococcaceae; g__Oscillospira; s__	0 ± 0	0 ± 0	x	x
197112	k__Bacteria; p__Firmicutes; c__Clostridia; o__Clostridiales; f__Lachnospiraceae; g__Coprococcus; s__	0 ± 0	0 ± 0	x	x
197624	k__Bacteria; p__Firmicutes; c__Clostridia; o__Clostridiales; f__Ruminococcaceae; g__; s__	0 ± 0	0 ± 0	x	x
198011	k__Bacteria; p__Firmicutes; c__Clostridia; o__Clostridiales; f__Ruminococcaceae; g__; s__	0 ± 0	0 ± 0	x	x
198127	k__Bacteria; p__Firmicutes; c__Clostridia; o__Clostridiales; f__Lachnospiraceae; g__; s__	0 ± 0	0 ± 0	x	x
198478	k__Bacteria; p__Firmicutes; c__Clostridia; o__Clostridiales; f__Lachnospiraceae; g__Anaerostipes; s__	0 ± 0	0 ± 0	x	x
198494	k__Bacteria; p__Firmicutes; c__Clostridia; o__Clostridiales; f__Lachnospiraceae; g__Roseburia; s__	0 ± 0	0 ± 0	x	x
198757	k__Bacteria; p__Firmicutes; c__Clostridia; o__Clostridiales; f__Ruminococcaceae; g__; s__	0 ± 0	0 ± 0	x	x
198910	k__Bacteria; p__Firmicutes; c__Clostridia; o__Clostridiales; f__Ruminococcaceae; g__; s__	0 ± 0	0 ± 0	x	x
199413	k__Bacteria; p__Firmicutes; c__Clostridia; o__Clostridiales; f__; g__; s__	0 ± 0	0 ± 0	x	x
199528	k__Bacteria; p__Firmicutes; c__Clostridia; o__Clostridiales; f__Ruminococcaceae; g__; s__	0 ± 0	0 ± 0	x	x
199702	k__Bacteria; p__Firmicutes; c__Clostridia; o__Clostridiales; f__Ruminococcaceae; g__Faecalibacterium; s__prausnitzii	0 ± 0	0 ± 0	x	x
210269	k__Bacteria; p__Proteobacteria; c__Gammaproteobacteria; o__Enterobacteriales; f__Enterobacteriaceae; g__; s__	0 ± 0	0 ± 0	x	x
212359	k__Bacteria; p__Firmicutes; c__Clostridia; o__Clostridiales; f__Lachnospiraceae; g__; s__	0 ± 0	0 ± 0	x	x
212698	k__Bacteria; p__Firmicutes; c__Clostridia; o__Clostridiales; f__Ruminococcaceae; g__Faecalibacterium; s__prausnitzii	0 ± 0	0 ± 0	x	x
213487	k__Bacteria; p__Firmicutes; c__Clostridia; o__Clostridiales; f__Ruminococcaceae; g__; s__	0 ± 0	0 ± 0	x	x
227697	k__Bacteria; p__Firmicutes; c__Clostridia; o__Clostridiales; f__Ruminococcaceae; g__Ruminococcus; s__	0 ± 0	0 ± 0	x	x
246717	k__Bacteria; p__Proteobacteria; c__Epsilonproteobacteria; o__Campylobacterales; f__Campylobacteraceae; g__Campylobacter; s__	0 ± 0	0 ± 0	x	x
259006	k__Bacteria; p__Firmicutes; c__Clostridia; o__Clostridiales; f__; g__; s__	0 ± 0	0 ± 0	x	x
268425	k__Bacteria; p__Firmicutes; c__Clostridia; o__Clostridiales; f__Ruminococcaceae; g__; s__	0 ± 0	0 ± 0	x	x
270448	k__Bacteria; p__Firmicutes; c__Clostridia; o__Clostridiales; f__; g__; s__	0 ± 0	0 ± 0	x	x
272974	k__Bacteria; p__Actinobacteria; c__Actinobacteria; o__Actinomycetales; f__Microbacteriaceae; g__Frigoribacterium; s__	0 ± 0	0 ± 0	x	x
293600	k__Bacteria; p__Firmicutes; c__Clostridia; o__Clostridiales; f__Lachnospiraceae; g__Dorea; s__	0 ± 0	0 ± 0	x	x
300963	k__Bacteria; p__Firmicutes; c__Clostridia; o__Clostridiales; f__; g__; s__	0 ± 0	0 ± 0	x	x
301727	k__Bacteria; p__Firmicutes; c__Clostridia; o__Clostridiales; f__Lachnospiraceae; g__; s__	0 ± 0	0 ± 0	x	x
302338	k__Bacteria; p__Firmicutes; c__Clostridia; o__Clostridiales; f__Lachnospiraceae; g__; s__	0 ± 0	0 ± 0	x	x
302960	k__Bacteria; p__Firmicutes; c__Clostridia; o__Clostridiales; f__Lachnospiraceae; g__; s__	0 ± 0	0 ± 0	x	x
304206	k__Bacteria; p__Firmicutes; c__Clostridia; o__Clostridiales; f__Lachnospiraceae; g__; s__	0 ± 0	0 ± 0	x	x
304427	k__Bacteria; p__Firmicutes; c__Clostridia; o__Clostridiales; f__Ruminococcaceae; g__Oscillospira; s__	0 ± 0	0 ± 0	x	x
307113	k__Bacteria; p__Firmicutes; c__Clostridia; o__Clostridiales; f__Lachnospiraceae; g__Blautia; s__	0 ± 0	0 ± 0	x	x
313499	k__Bacteria; p__Bacteroidetes; c__Bacteroidia; o__Bacteroidales; f__S24-7; g__; s__	0 ± 0	0 ± 0	x	x
318190	k__Bacteria; p__Firmicutes; c__Clostridia; o__Clostridiales; f__Ruminococcaceae; g__; s__	0 ± 0	0 ± 0	x	x
320430	k__Bacteria; p__Firmicutes; c__Clostridia; o__Clostridiales; f__Lachnospiraceae; g__Dorea; s__	0 ± 0	0 ± 0	x	x
321902	k__Bacteria; p__Firmicutes; c__Clostridia; o__Clostridiales; f__Lachnospiraceae; g__; s__	0 ± 0	0 ± 0	x	x
324236	k__Bacteria; p__Firmicutes; c__Clostridia; o__Clostridiales; f__Lachnospiraceae; g__[Ruminococcus]; s__	0 ± 0	0 ± 0	x	x
331116	k__Bacteria; p__Firmicutes; c__Clostridia; o__Clostridiales; f__Lachnospiraceae; g__; s__	0 ± 0	0 ± 0	x	x
342085	k__Bacteria; p__Firmicutes; c__Clostridia; o__Clostridiales; f__Lachnospiraceae; g__; s__	0 ± 0	0 ± 0	x	x
345542	k__Bacteria; p__Firmicutes; c__Clostridia; o__Clostridiales; f__Lachnospiraceae; g__Roseburia; s__	0 ± 0	0 ± 0	x	x
351163	k__Bacteria; p__Firmicutes; c__Clostridia; o__Clostridiales; f__Lachnospiraceae; g__Blautia; s__producta	0 ± 0	0 ± 0	x	x
353577	k__Bacteria; p__Firmicutes; c__Clostridia; o__Clostridiales; f__Lachnospiraceae; g__Coprococcus; s__	0 ± 0	0 ± 0	x	x
357449	k__Bacteria; p__Firmicutes; c__Clostridia; o__Clostridiales; f__Lachnospiraceae; g__Coprococcus; s__	0 ± 0	0 ± 0	x	x
360000	k__Bacteria; p__Bacteroidetes; c__Bacteroidia; o__Bacteroidales; f__Bacteroidaceae; g__Bacteroides; s__	0 ± 0	0 ± 0	x	x
367909	k__Bacteria; p__Firmicutes; c__Clostridia; o__Clostridiales; f__Lachnospiraceae; g__; s__	0 ± 0	0 ± 0	x	x
494906	k__Bacteria; p__Firmicutes; c__Clostridia; o__Clostridiales; f__[Tissierellaceae]; g__Peptoniphilus; s__	0 ± 0	0 ± 0	x	x
508968	k__Bacteria; p__Firmicutes; c__Clostridia; o__Clostridiales; f__Lachnospiraceae; g__Roseburia; s__	0 ± 0	0 ± 0	x	x
509709	k__Bacteria; p__Firmicutes; c__Clostridia; o__Clostridiales; f__Lachnospiraceae; g__; s__	0 ± 0	0 ± 0	x	x
518040	k__Bacteria; p__Firmicutes; c__Clostridia; o__Clostridiales; f__; g__; s__	0 ± 0	0 ± 0	x	x
531539	k__Bacteria; p__Firmicutes; c__Clostridia; o__Clostridiales; f__Lachnospiraceae; g__; s__	0 ± 0	0 ± 0	x	x
550807	k__Bacteria; p__Firmicutes; c__Clostridia; o__Clostridiales; f__Ruminococcaceae; g__; s__	0 ± 0	0 ± 0	x	x
560336	k__Bacteria; p__Bacteroidetes; c__Bacteroidia; o__Bacteroidales; f__Bacteroidaceae; g__Bacteroides; s__	0 ± 0	0 ± 0	x	x
572750	k__Bacteria; p__Proteobacteria; c__Gammaproteobacteria; o__Enterobacteriales; f__Enterobacteriaceae; g__Trabulsiella; s__	0 ± 0	0 ± 0	x	x
688800	k__Bacteria; p__Firmicutes; c__Clostridia; o__Clostridiales; f__Ruminococcaceae; g__; s__	0 ± 0	0 ± 0	x	x
695612	k__Bacteria; p__Firmicutes; c__Clostridia; o__Clostridiales; f__; g__; s__	0 ± 0	0 ± 0	x	x
759751	k__Bacteria; p__Firmicutes; c__Clostridia; o__Clostridiales; f__Lachnospiraceae; g__; s__	0 ± 0	0 ± 0	x	x
971907	k__Bacteria; p__Proteobacteria; c__Gammaproteobacteria; o__Pasteurellales; f__Pasteurellaceae; g__Actinobacillus; s__parahaemolyticus	0 ± 0	0 ± 0	x	x
979707	k__Bacteria; p__Bacteroidetes; c__Bacteroidia; o__Bacteroidales; f__Porphyromonadaceae; g__Porphyromonas; s__	0 ± 0	0 ± 0	x	x
1105343	k__Bacteria; p__Firmicutes; c__Clostridia; o__Clostridiales; f__Clostridiaceae; g__Clostridium; s__	0 ± 0	0 ± 0	x	x
1888072	k__Bacteria; p__Proteobacteria; c__Gammaproteobacteria; o__Enterobacteriales; f__Enterobacteriaceae; g__Klebsiella; s__	0 ± 0	0 ± 0	x	x
2203165	k__Bacteria; p__Firmicutes; c__Clostridia; o__Clostridiales; f__Ruminococcaceae; g__Oscillospira; s__	0 ± 0	0 ± 0	x	x
2388088	k__Bacteria; p__Firmicutes; c__Clostridia; o__Clostridiales; f__Lachnospiraceae; g__; s__	0 ± 0	0 ± 0	x	x
2575651	k__Bacteria; p__Firmicutes; c__Clostridia; o__Clostridiales; f__; g__; s__	0 ± 0	0 ± 0	x	x
2700883	k__Bacteria; p__Firmicutes; c__Clostridia; o__Clostridiales; f__Ruminococcaceae; g__; s__	0 ± 0	0 ± 0	x	x
2938041	k__Bacteria; p__Firmicutes; c__Clostridia; o__Clostridiales; f__Lachnospiraceae; g__; s__	0 ± 0	0 ± 0	x	x
3195932	k__Bacteria; p__Bacteroidetes; c__Bacteroidia; o__Bacteroidales; f__Bacteroidaceae; g__Bacteroides; s__	0 ± 0	0 ± 0	x	x
3231096	k__Bacteria; p__Bacteroidetes; c__Bacteroidia; o__Bacteroidales; f__S24-7; g__; s__	0 ± 0	0 ± 0	x	x
3325758	k__Bacteria; p__Bacteroidetes; c__Bacteroidia; o__Bacteroidales; f__Bacteroidaceae; g__Bacteroides; s__	0 ± 0	0 ± 0	x	x
3426658	k__Bacteria; p__Bacteroidetes; c__Bacteroidia; o__Bacteroidales; f__Bacteroidaceae; g__Bacteroides; s__	0 ± 0	0 ± 0	x	x
3465233	k__Bacteria; p__Bacteroidetes; c__Bacteroidia; o__Bacteroidales; f__Bacteroidaceae; g__Bacteroides; s__	0 ± 0	0 ± 0	x	x
3550159	k__Bacteria; p__Bacteroidetes; c__Bacteroidia; o__Bacteroidales; f__Bacteroidaceae; g__Bacteroides; s__fragilis	0 ± 0	0 ± 0	x	x
3747551	k__Bacteria; p__Firmicutes; c__Clostridia; o__Clostridiales; f__Lachnospiraceae; g__; s__	0 ± 0	0 ± 0	x	x
3857424	k__Bacteria; p__Firmicutes; c__Clostridia; o__Clostridiales; f__Lachnospiraceae; g__; s__	0 ± 0	0 ± 0	x	x
3874253	k__Bacteria; p__Firmicutes; c__Clostridia; o__Clostridiales; f__Lachnospiraceae; g__; s__	0 ± 0	0 ± 0	x	x
4212517	k__Bacteria; p__Firmicutes; c__Clostridia; o__Clostridiales; f__Lachnospiraceae; g__; s__	0 ± 0	0 ± 0	x	x
4301407	k__Bacteria; p__Proteobacteria; c__Alphaproteobacteria; o__Rhizobiales; f__Rhizobiaceae; g__Agrobacterium; s__	0 ± 0	0 ± 0	x	x
4318872	k__Bacteria; p__Proteobacteria; c__Gammaproteobacteria; o__Pasteurellales; f__Pasteurellaceae; g__Haemophilus; s__	0 ± 0	0 ± 0	x	x
4326091	k__Bacteria; p__Firmicutes; c__Clostridia; o__Clostridiales; f__Ruminococcaceae; g__Ruminococcus; s__	0 ± 0	0 ± 0	x	x
4334770	k__Bacteria; p__Firmicutes; c__Clostridia; o__Clostridiales; f__Veillonellaceae; g__Veillonella; s__dispar	0 ± 0	0 ± 0	x	x
4340036	k__Bacteria; p__Firmicutes; c__Clostridia; o__Clostridiales; f__Lachnospiraceae; g__[Ruminococcus]; s__torques	0 ± 0	0 ± 0	x	x
4346469	k__Bacteria; p__Firmicutes; c__Clostridia; o__Clostridiales; f__Ruminococcaceae; g__Ruminococcus; s__	0 ± 0	0 ± 0	x	x
4357353	k__Bacteria; p__Firmicutes; c__Clostridia; o__Clostridiales; f__Lachnospiraceae; g__Dorea; s__	0 ± 0	0 ± 0	x	x
4357811	k__Bacteria; p__Bacteroidetes; c__Bacteroidia; o__Bacteroidales; f__Bacteroidaceae; g__Bacteroides; s__	0 ± 0	0 ± 0	x	x
4369434	k__Bacteria; p__Firmicutes; c__Clostridia; o__Clostridiales; f__Lachnospiraceae; g__; s__	0 ± 0	0 ± 0	x	x
4377091	k__Bacteria; p__Bacteroidetes; c__Bacteroidia; o__Bacteroidales; f__Bacteroidaceae; g__Bacteroides; s__fragilis	0 ± 0	0 ± 0	x	x
4396235	k__Bacteria; p__Proteobacteria; c__Betaproteobacteria; o__Neisseriales; f__Neisseriaceae; g__Neisseria; s__subflava	0 ± 0	0 ± 0	x	x
4405104	k__Bacteria; p__Firmicutes; c__Clostridia; o__Clostridiales; f__Lachnospiraceae; g__Coprococcus; s__	0 ± 0	0 ± 0	x	x
4412542	k__Bacteria; p__Bacteroidetes; c__Bacteroidia; o__Bacteroidales; f__Prevotellaceae; g__Prevotella; s__copri	0 ± 0	0 ± 0	x	x
4417325	k__Bacteria; p__Bacteroidetes; c__Bacteroidia; o__Bacteroidales; f__Bacteroidaceae; g__Bacteroides; s__	0 ± 0	0 ± 0	x	x
4440624	k__Bacteria; p__Firmicutes; c__Clostridia; o__Clostridiales; f__Lachnospiraceae; g__; s__	0 ± 0	0 ± 0	x	x
4442779	k__Bacteria; p__Proteobacteria; c__Gammaproteobacteria; o__Cardiobacteriales; f__Cardiobacteriaceae; g__Cardiobacterium; s__	0 ± 0	0 ± 0	x	x
4445028	k__Bacteria; p__Firmicutes; c__Clostridia; o__Clostridiales; f__Ruminococcaceae; g__Faecalibacterium; s__prausnitzii	0 ± 0	0 ± 0	x	x
4461030	k__Bacteria; p__Proteobacteria; c__Gammaproteobacteria; o__Enterobacteriales; f__Enterobacteriaceae; g__; s__	0 ± 0	0 ± 0	x	x
4464065	k__Bacteria; p__Firmicutes; c__Clostridia; o__Clostridiales; f__Lachnospiraceae; g__; s__	0 ± 0	0 ± 0	x	x
4465472	k__Bacteria; p__Firmicutes; c__Clostridia; o__Clostridiales; f__Lachnospiraceae; g__; s__	0 ± 0	0 ± 0	x	x
4469302	k__Bacteria; p__Firmicutes; c__Clostridia; o__Clostridiales; f__Lachnospiraceae; g__; s__	0 ± 0	0 ± 0	x	x
182609	k__Bacteria; p__Firmicutes; c__Clostridia; o__Clostridiales; f__Ruminococcaceae; g__Faecalibacterium; s__prausnitzii	0.406 ± 0.24	0.088 ± 0.056	x	x
175751	k__Bacteria; p__Firmicutes; c__Clostridia; o__Clostridiales; f__Lachnospiraceae; g__; s__	0.001 ± 0.001	0 ± 0	x	x
177732	k__Bacteria; p__Firmicutes; c__Clostridia; o__Clostridiales; f__Ruminococcaceae; g__Faecalibacterium; s__prausnitzii	0.001 ± 0.001	0 ± 0	x	x
179715	k__Bacteria; p__Firmicutes; c__Clostridia; o__Clostridiales; f__Lachnospiraceae; g__Blautia; s__	0.001 ± 0.001	0 ± 0	x	x
312586	k__Bacteria; p__Firmicutes; c__Clostridia; o__Clostridiales; f__Lachnospiraceae; g__; s__	0.001 ± 0.001	0 ± 0	x	x
316496	k__Bacteria; p__Firmicutes; c__Clostridia; o__Clostridiales; f__Clostridiaceae; g__SMB53; s__	0.001 ± 0.001	0 ± 0	x	x
360995	k__Bacteria; p__Firmicutes; c__Clostridia; o__Clostridiales; f__Ruminococcaceae; g__; s__	0.001 ± 0.001	0 ± 0	x	x
174614	k__Bacteria; p__Firmicutes; c__Clostridia; o__Clostridiales; f__Ruminococcaceae; g__Ruminococcus; s__	0.005 ± 0.002	0.001 ± 0.001	x	x
287978	k__Bacteria; p__Firmicutes; c__Clostridia; o__Clostridiales; f__Lachnospiraceae; g__Blautia; s__	0.009 ± 0.005	0.003 ± 0.001	x	x
288004	k__Bacteria; p__Actinobacteria; c__Coriobacteriia; o__Coriobacteriales; f__Coriobacteriaceae; g__Collinsella; s__stercoris	0 ± 0	0.07 ± 0.07	x	x
157842	k__Bacteria; p__Firmicutes; c__Clostridia; o__Clostridiales; f__; g__; s__	0 ± 0	0.002 ± 0.002	x	x
181016	k__Bacteria; p__Firmicutes; c__Clostridia; o__Clostridiales; f__Ruminococcaceae; g__Ruminococcus; s__	0 ± 0	0.004 ± 0.004	x	x
3861782	k__Bacteria; p__Firmicutes; c__Clostridia; o__Clostridiales; f__Clostridiaceae; g__SMB53; s__	0 ± 0	0.004 ± 0.003	x	x
4217959	k__Bacteria; p__Firmicutes; c__Clostridia; o__Clostridiales; f__; g__; s__	0.01 ± 0.005	0.004 ± 0.002	x	x
4217963	k__Bacteria; p__Firmicutes; c__Clostridia; o__Clostridiales; f__Lachnospiraceae; g__; s__	0.007 ± 0.005	0.001 ± 0.001	x	x
177941	k__Bacteria; p__Firmicutes; c__Clostridia; o__Clostridiales; f__Lachnospiraceae; g__Blautia; s__	0.002 ± 0.002	0.013 ± 0.01	x	x
1602314	k__Bacteria; p__Firmicutes; c__Clostridia; o__Clostridiales; f__; g__; s__	0.021 ± 0.006	0.011 ± 0.004	x	x
4361093	k__Bacteria; p__Firmicutes; c__Clostridia; o__Clostridiales; f__Lachnospiraceae; g__; s__	0.001 ± 0	0.004 ± 0.002	x	x
176067	k__Bacteria; p__Firmicutes; c__Clostridia; o__Clostridiales; f__Lachnospiraceae; g__[Ruminococcus]; s__	0 ± 0	0.001 ± 0.001	x	x
188234	k__Bacteria; p__Firmicutes; c__Clostridia; o__Clostridiales; f__Lachnospiraceae; g__; s__	0 ± 0	0.001 ± 0.001	x	x
197273	k__Bacteria; p__Firmicutes; c__Bacilli; o__Lactobacillales; f__Streptococcaceae; g__Streptococcus; s__	0 ± 0	0.001 ± 0.001	x	x
484304	k__Bacteria; p__Actinobacteria; c__Actinobacteria; o__Bifidobacteriales; f__Bifidobacteriaceae; g__Bifidobacterium; s__	0 ± 0	0.001 ± 0.001	x	x
191945	k__Bacteria; p__Firmicutes; c__Clostridia; o__Clostridiales; f__; g__; s__	0.014 ± 0.004	0.031 ± 0.012	x	x
580008	k__Bacteria; p__Firmicutes; c__Erysipelotrichi; o__Erysipelotrichales; f__Erysipelotrichaceae; g__; s__	3.234 ± 2.101	0.66 ± 0.26	x	x
593043	k__Bacteria; p__Verrucomicrobia; c__Verrucomicrobiae; o__Verrucomicrobiales; f__Verrucomicrobiaceae; g__Akkermansia; s__muciniphila	0.09 ± 0.059	1.045 ± 0.792	x	x
157448	k__Bacteria; p__Firmicutes; c__Bacilli; o__Lactobacillales; f__Lactobacillaceae; g__Lactobacillus; s__	0.001 ± 0.001	0.002 ± 0.001	x	x
193452	k__Bacteria; p__Firmicutes; c__Clostridia; o__Clostridiales; f__Lachnospiraceae; g__; s__	0.001 ± 0	0.002 ± 0.001	x	x
308684	k__Bacteria; p__Firmicutes; c__Clostridia; o__Clostridiales; f__Clostridiaceae; g__; s__	0.001 ± 0	0.002 ± 0.001	x	x
1141218	k__Bacteria; p__Actinobacteria; c__Coriobacteriia; o__Coriobacteriales; f__Coriobacteriaceae; g__Eggerthella; s__	0.001 ± 0.001	0.002 ± 0.001	x	x
681370	k__Bacteria; p__Actinobacteria; c__Actinobacteria; o__Bifidobacteriales; f__Bifidobacteriaceae; g__Bifidobacterium; s__pseudolongum	0 ± 0	0.005 ± 0.005	x	x
174695	k__Bacteria; p__Firmicutes; c__Clostridia; o__Clostridiales; f__Lachnospiraceae; g__; s__	0 ± 0	0.002 ± 0.002	x	x
176828	k__Bacteria; p__Actinobacteria; c__Coriobacteriia; o__Coriobacteriales; f__Coriobacteriaceae; g__; s__	0 ± 0	0.066 ± 0.048	x	x
177224	k__Bacteria; p__Firmicutes; c__Clostridia; o__Clostridiales; f__Lachnospiraceae; g__; s__	0.035 ± 0.032	0.001 ± 0	x	x
3044876	k__Bacteria; p__Firmicutes; c__Clostridia; o__Clostridiales; f__Lachnospiraceae; g__[Ruminococcus]; s__gnavus	0.004 ± 0.002	0.001 ± 0.001	x	x
4392188	k__Bacteria; p__Firmicutes; c__Clostridia; o__Clostridiales; f__Lachnospiraceae; g__Roseburia; s__faecis	0.075 ± 0.042	0.019 ± 0.01	x	x
187924	k__Bacteria; p__Firmicutes; c__Clostridia; o__Clostridiales; f__Ruminococcaceae; g__; s__	0.005 ± 0.002	0.002 ± 0.001	x	x
4352657	k__Bacteria; p__Firmicutes; c__Clostridia; o__Clostridiales; f__Lachnospiraceae; g__Blautia; s__	0.007 ± 0.005	0.073 ± 0.055	x	x
4383827	k__Bacteria; p__Firmicutes; c__Clostridia; o__Clostridiales; f__Lachnospiraceae; g__[Ruminococcus]; s__gnavus	0.012 ± 0.005	0.004 ± 0.002	x	x
188675	k__Bacteria; p__Firmicutes; c__Clostridia; o__Clostridiales; f__Lachnospiraceae; g__; s__	0.002 ± 0.001	0.001 ± 0.001	x	x
170462	k__Bacteria; p__Firmicutes; c__Clostridia; o__Clostridiales; f__Lachnospiraceae; g__[Ruminococcus]; s__	0.042 ± 0.019	0.086 ± 0.028	x	x
199054	k__Bacteria; p__Firmicutes; c__Clostridia; o__Clostridiales; f__Lachnospiraceae; g__; s__	0.019 ± 0.01	0.005 ± 0.002	x	x
4458959	k__Bacteria; p__Firmicutes; c__Clostridia; o__Clostridiales; f__Veillonellaceae; g__Veillonella; s__	0.009 ± 0.008	0.001 ± 0	x	x
578016	k__Bacteria; p__Bacteroidetes; c__Bacteroidia; o__Bacteroidales; f__Porphyromonadaceae; g__Parabacteroides; s__distasonis	0.067 ± 0.044	0.005 ± 0.002	x	x
185936	k__Bacteria; p__Firmicutes; c__Clostridia; o__Clostridiales; f__Ruminococcaceae; g__; s__	0.002 ± 0.001	0.001 ± 0	x	x
261590	k__Bacteria; p__Firmicutes; c__Clostridia; o__Clostridiales; f__Peptostreptococcaceae; g__; s__	0.008 ± 0.003	0.016 ± 0.006	x	x
305318	k__Bacteria; p__Firmicutes; c__Clostridia; o__Clostridiales; f__Lachnospiraceae; g__; s__	0.016 ± 0.009	0.002 ± 0.001	x	x
185232	k__Bacteria; p__Firmicutes; c__Clostridia; o__Clostridiales; f__Lachnospiraceae; g__; s__	0.007 ± 0.004	0.002 ± 0.001	x	x
190572	k__Bacteria; p__Firmicutes; c__Clostridia; o__Clostridiales; f__Ruminococcaceae; g__Faecalibacterium; s__prausnitzii	0.002 ± 0.001	0.001 ± 0	x	x
291648	k__Bacteria; p__Firmicutes; c__Clostridia; o__Clostridiales; f__Ruminococcaceae; g__; s__	0.003 ± 0.001	0.001 ± 0.001	x	x
322835	k__Bacteria; p__Firmicutes; c__Clostridia; o__Clostridiales; f__Lachnospiraceae; g__Lachnospira; s__	0.003 ± 0.002	0 ± 0	x	x
4468384	k__Bacteria; p__Firmicutes; c__Clostridia; o__Clostridiales; f__Lachnospiraceae; g__Blautia; s__	0.001 ± 0.001	0.094 ± 0.089	x	x
4375080	k__Bacteria; p__Proteobacteria; c__Gammaproteobacteria; o__Pasteurellales; f__Pasteurellaceae; g__Haemophilus; s__parainfluenzae	0.021 ± 0.013	0.002 ± 0.001	x	x
192221	k__Bacteria; p__Firmicutes; c__Clostridia; o__Clostridiales; f__Lachnospiraceae; g__; s__	0.194 ± 0.143	0.025 ± 0.011	x	x
192406	k__Bacteria; p__Firmicutes; c__Clostridia; o__Clostridiales; f__Ruminococcaceae; g__; s__	0.059 ± 0.038	0.008 ± 0.003	x	x
195105	k__Bacteria; p__Firmicutes; c__Clostridia; o__Clostridiales; f__Lachnospiraceae; g__Roseburia; s__faecis	0.006 ± 0.004	0.001 ± 0.001	x	x
4324964	k__Bacteria; p__Bacteroidetes; c__Bacteroidia; o__Bacteroidales; f__Bacteroidaceae; g__Bacteroides; s__	0.031 ± 0.028	0.002 ± 0.002	x	x
184971	k__Bacteria; p__Firmicutes; c__Clostridia; o__Clostridiales; f__Ruminococcaceae; g__; s__	0.004 ± 0.002	0.002 ± 0.001	x	x
197783	k__Bacteria; p__Firmicutes; c__Clostridia; o__Clostridiales; f__Lachnospiraceae; g__; s__	0 ± 0	0.005 ± 0.004	x	x
177310	k__Bacteria; p__Firmicutes; c__Clostridia; o__Clostridiales; f__; g__; s__	0.014 ± 0.01	0.091 ± 0.056	x	x
339599	k__Bacteria; p__Bacteroidetes; c__Bacteroidia; o__Bacteroidales; f__Bacteroidaceae; g__Bacteroides; s__fragilis	0.045 ± 0.038	0.003 ± 0.003	x	x
1860111	k__Bacteria; p__Firmicutes; c__Clostridia; o__Clostridiales; f__Lachnospiraceae; g__Roseburia; s__	0.001 ± 0	0.003 ± 0.001	x	x
2291414	k__Bacteria; p__Proteobacteria; c__Gammaproteobacteria; o__Pasteurellales; f__Pasteurellaceae; g__Haemophilus; s__parainfluenzae	0.004 ± 0.004	0 ± 0	x	x
3943186	k__Bacteria; p__Firmicutes; c__Clostridia; o__Clostridiales; f__Lachnospiraceae; g__Lachnobacterium; s__	0.004 ± 0.002	0 ± 0	x	x
187782	k__Bacteria; p__Firmicutes; c__Clostridia; o__Clostridiales; f__Lachnospiraceae; g__Coprococcus; s__	0.001 ± 0.001	0.002 ± 0.001	x	x
4356080	k__Bacteria; p__Bacteroidetes; c__Bacteroidia; o__Bacteroidales; f__[Barnesiellaceae]; g__; s__	0.173 ± 0.156	0.002 ± 0.001	x	x
189208	k__Bacteria; p__Firmicutes; c__Clostridia; o__Clostridiales; f__Lachnospiraceae; g__; s__	0.088 ± 0.085	0.001 ± 0	x	x
323746	k__Bacteria; p__Firmicutes; c__Clostridia; o__Clostridiales; f__; g__; s__	0.015 ± 0.007	0.033 ± 0.012	x	x
580629	k__Bacteria; p__Bacteroidetes; c__Bacteroidia; o__Bacteroidales; f__Bacteroidaceae; g__Bacteroides; s__	0.017 ± 0.012	0 ± 0	x	x
186077	k__Bacteria; p__Firmicutes; c__Clostridia; o__Clostridiales; f__Lachnospiraceae; g__Roseburia; s__faecis	0.005 ± 0.003	0.001 ± 0.001	x	x
175559	k__Bacteria; p__Firmicutes; c__Clostridia; o__Clostridiales; f__Lachnospiraceae; g__Blautia; s__	0.001 ± 0	0.002 ± 0.001	x	x
185836	k__Bacteria; p__Firmicutes; c__Clostridia; o__Clostridiales; f__Lachnospiraceae; g__Blautia; s__	0.002 ± 0.002	0 ± 0	x	x
197988	k__Bacteria; p__Firmicutes; c__Clostridia; o__Clostridiales; f__Ruminococcaceae; g__Oscillospira; s__	0.005 ± 0.003	0.021 ± 0.012	x	x
370287	k__Bacteria; p__Firmicutes; c__Clostridia; o__Clostridiales; f__Ruminococcaceae; g__Faecalibacterium; s__prausnitzii	0.005 ± 0.003	0.001 ± 0.001	x	x
182542	k__Bacteria; p__Firmicutes; c__Clostridia; o__Clostridiales; f__Lachnospiraceae; g__Blautia; s__	0.002 ± 0.001	0.001 ± 0	x	x
340474	k__Bacteria; p__Bacteroidetes; c__Bacteroidia; o__Bacteroidales; f__Bacteroidaceae; g__Bacteroides; s__	0.01 ± 0.007	0 ± 0	x	x
368698	k__Bacteria; p__Firmicutes; c__Clostridia; o__Clostridiales; f__Lachnospiraceae; g__; s__	0.005 ± 0.005	0 ± 0	x	x
4379889	k__Bacteria; p__Firmicutes; c__Clostridia; o__Clostridiales; f__Lachnospiraceae; g__; s__	0.007 ± 0.006	0 ± 0	x	x
184036	k__Bacteria; p__Firmicutes; c__Clostridia; o__Clostridiales; f__; g__; s__	0.01 ± 0.008	0.001 ± 0	x	x
367947	k__Bacteria; p__Firmicutes; c__Clostridia; o__Clostridiales; f__Lachnospiraceae; g__; s__	0.003 ± 0.002	0 ± 0	x	x
2198356	k__Bacteria; p__Bacteroidetes; c__Bacteroidia; o__Bacteroidales; f__Bacteroidaceae; g__Bacteroides; s__	0.005 ± 0.004	0 ± 0	x	x
3434021	k__Bacteria; p__Firmicutes; c__Clostridia; o__Clostridiales; f__Clostridiaceae; g__Clostridium; s__	0.008 ± 0.006	0.035 ± 0.021	x	x
4029632	k__Bacteria; p__Bacteroidetes; c__Bacteroidia; o__Bacteroidales; f__Bacteroidaceae; g__Bacteroides; s__	0.02 ± 0.013	0 ± 0	x	x
174489	k__Bacteria; p__Firmicutes; c__Clostridia; o__Clostridiales; f__Lachnospiraceae; g__; s__	0.023 ± 0.014	0.002 ± 0.001	x	x
581021	k__Bacteria; p__Proteobacteria; c__Gammaproteobacteria; o__Enterobacteriales; f__Enterobacteriaceae; g__; s__	0.446 ± 0.293	0.034 ± 0.021	x	x
181718	k__Bacteria; p__Firmicutes; c__Clostridia; o__Clostridiales; f__Lachnospiraceae; g__; s__	0.001 ± 0.001	0.001 ± 0	x	x
191153	k__Bacteria; p__Firmicutes; c__Clostridia; o__Clostridiales; f__Ruminococcaceae; g__; s__	0.001 ± 0.001	0.001 ± 0	x	x
259212	k__Bacteria; p__Firmicutes; c__Clostridia; o__Clostridiales; f__Clostridiaceae; g__; s__	0.001 ± 0	0.003 ± 0.001	x	x
177134	k__Bacteria; p__Firmicutes; c__Clostridia; o__Clostridiales; f__Ruminococcaceae; g__; s__	0.007 ± 0.006	0 ± 0	x	x
322433	k__Bacteria; p__Firmicutes; c__Clostridia; o__Clostridiales; f__Ruminococcaceae; g__; s__	0.013 ± 0.009	0 ± 0	x	x
4094259	k__Bacteria; p__Firmicutes; c__Clostridia; o__Clostridiales; f__Ruminococcaceae; g__; s__	0.012 ± 0.008	0.002 ± 0.002	x	x
4364405	k__Bacteria; p__Firmicutes; c__Clostridia; o__Clostridiales; f__Ruminococcaceae; g__; s__	0.034 ± 0.024	0.001 ± 0.001	x	x
4416025	k__Bacteria; p__Firmicutes; c__Clostridia; o__Clostridiales; f__Lachnospiraceae; g__[Ruminococcus]; s__gnavus	0.016 ± 0.008	0.005 ± 0.002	x	x
174008	k__Bacteria; p__Firmicutes; c__Clostridia; o__Clostridiales; f__Lachnospiraceae; g__; s__	0.004 ± 0.004	0 ± 0	x	x
191112	k__Bacteria; p__Firmicutes; c__Clostridia; o__Clostridiales; f__Lachnospiraceae; g__; s__	0.022 ± 0.021	0 ± 0	x	x
193370	k__Bacteria; p__Firmicutes; c__Clostridia; o__Clostridiales; f__Lachnospiraceae; g__; s__	0.002 ± 0.001	0.006 ± 0.003	x	x
4381553	k__Bacteria; p__Bacteroidetes; c__Bacteroidia; o__Bacteroidales; f__Bacteroidaceae; g__Bacteroides; s__	0.819 ± 0.538	0.043 ± 0.034	x	x
356360	k__Bacteria; p__Firmicutes; c__Clostridia; o__Clostridiales; f__Ruminococcaceae; g__; s__	0.002 ± 0.001	0.001 ± 0	x	x
178420	k__Bacteria; p__Firmicutes; c__Clostridia; o__Clostridiales; f__; g__; s__	0.001 ± 0.001	0.002 ± 0.001	x	x
180120	k__Bacteria; p__Firmicutes; c__Clostridia; o__Clostridiales; f__Lachnospiraceae; g__Coprococcus; s__	0.001 ± 0	0.002 ± 0.001	x	x
180736	k__Bacteria; p__Firmicutes; c__Clostridia; o__Clostridiales; f__Lachnospiraceae; g__Blautia; s__	0.003 ± 0.001	0.027 ± 0.016	x	x
183988	k__Bacteria; p__Firmicutes; c__Clostridia; o__Clostridiales; f__; g__; s__	0.003 ± 0.002	0 ± 0	x	x
185711	k__Bacteria; p__Firmicutes; c__Clostridia; o__Clostridiales; f__; g__; s__	0.014 ± 0.013	0.001 ± 0.001	x	x
187883	k__Bacteria; p__Firmicutes; c__Clostridia; o__Clostridiales; f__Ruminococcaceae; g__; s__	0.018 ± 0.009	0.006 ± 0.004	x	x
186143	k__Bacteria; p__Firmicutes; c__Clostridia; o__Clostridiales; f__Ruminococcaceae; g__; s__	0.126 ± 0.058	0.051 ± 0.02	x	x
213394	k__Bacteria; p__Firmicutes; c__Clostridia; o__Clostridiales; f__Lachnospiraceae; g__Lachnospira; s__	0.08 ± 0.078	0 ± 0	x	x
183030	k__Bacteria; p__Firmicutes; c__Clostridia; o__Clostridiales; f__; g__; s__	0.029 ± 0.029	0 ± 0	x	x
185812	k__Bacteria; p__Firmicutes; c__Clostridia; o__Clostridiales; f__Lachnospiraceae; g__Blautia; s__	0.003 ± 0.001	0.009 ± 0.004	x	x
186780	k__Bacteria; p__Firmicutes; c__Clostridia; o__Clostridiales; f__Lachnospiraceae; g__Coprococcus; s__	0.018 ± 0.006	0.01 ± 0.004	x	x
4372612	k__Bacteria; p__Bacteroidetes; c__Bacteroidia; o__Bacteroidales; f__Bacteroidaceae; g__Bacteroides; s__	0.022 ± 0.017	0.003 ± 0.001	x	x
17444	k__Bacteria; p__Firmicutes; c__Bacilli; o__Lactobacillales; f__Enterococcaceae; g__Enterococcus; s__	0 ± 0	0.001 ± 0.001	x	x
83803	k__Bacteria; p__Firmicutes; c__Clostridia; o__Clostridiales; f__[Tissierellaceae]; g__Peptoniphilus; s__	0 ± 0	0.001 ± 0	x	x
157693	k__Bacteria; p__Firmicutes; c__Clostridia; o__Clostridiales; f__; g__; s__	0 ± 0	0.001 ± 0.001	x	x
176561	k__Bacteria; p__Firmicutes; c__Clostridia; o__Clostridiales; f__Lachnospiraceae; g__Blautia; s__	0 ± 0	0.001 ± 0	x	x
176885	k__Bacteria; p__Firmicutes; c__Clostridia; o__Clostridiales; f__Lachnospiraceae; g__Blautia; s__	0 ± 0	0.001 ± 0	x	x
178055	k__Bacteria; p__Firmicutes; c__Clostridia; o__Clostridiales; f__Lachnospiraceae; g__[Ruminococcus]; s__	0 ± 0	0.001 ± 0.001	x	x
178211	k__Bacteria; p__Firmicutes; c__Clostridia; o__Clostridiales; f__Lachnospiraceae; g__[Ruminococcus]; s__	0 ± 0	0.001 ± 0	x	x
181828	k__Bacteria; p__Firmicutes; c__Clostridia; o__Clostridiales; f__Lachnospiraceae; g__; s__	0 ± 0	0.001 ± 0	x	x
187077	k__Bacteria; p__Firmicutes; c__Clostridia; o__Clostridiales; f__Lachnospiraceae; g__; s__	0 ± 0	0.001 ± 0	x	x
192225	k__Bacteria; p__Firmicutes; c__Clostridia; o__Clostridiales; f__; g__; s__	0 ± 0	0.001 ± 0	x	x
199694	k__Bacteria; p__Firmicutes; c__Clostridia; o__Clostridiales; f__Clostridiaceae; g__Clostridium; s__	0 ± 0	0.001 ± 0.001	x	x
237138	k__Bacteria; p__Firmicutes; c__Clostridia; o__Clostridiales; f__Lachnospiraceae; g__Blautia; s__	0 ± 0	0.001 ± 0.001	x	x
242029	k__Bacteria; p__Bacteroidetes; c__Bacteroidia; o__Bacteroidales; f__S24-7; g__; s__	0 ± 0	0.001 ± 0	x	x
287608	k__Bacteria; p__Firmicutes; c__Clostridia; o__Clostridiales; f__Ruminococcaceae; g__Ruminococcus; s__	0 ± 0	0.001 ± 0	x	x
198909	k__Bacteria; p__Firmicutes; c__Clostridia; o__Clostridiales; f__Lachnospiraceae; g__Lachnospira; s__	0.002 ± 0.002	0 ± 0	x	x
332317	k__Bacteria; p__Bacteroidetes; c__Bacteroidia; o__Bacteroidales; f__Bacteroidaceae; g__Bacteroides; s__	0.22 ± 0.182	0.017 ± 0.014	x	x
335906	k__Bacteria; p__Firmicutes; c__Clostridia; o__Clostridiales; f__Ruminococcaceae; g__; s__	0.004 ± 0.003	0 ± 0	x	x
4318935	k__Bacteria; p__Proteobacteria; c__Gammaproteobacteria; o__Enterobacteriales; f__Enterobacteriaceae; g__; s__	0.004 ± 0.003	0 ± 0	x	x
4476780	k__Bacteria; p__Bacteroidetes; c__Bacteroidia; o__Bacteroidales; f__Rikenellaceae; g__; s__	0.424 ± 0.362	0.022 ± 0.015	x	x
172233	k__Bacteria; p__Firmicutes; c__Clostridia; o__Clostridiales; f__Ruminococcaceae; g__; s__	0.001 ± 0.001	0.002 ± 0.001	x	x
187256	k__Bacteria; p__Firmicutes; c__Clostridia; o__Clostridiales; f__Lachnospiraceae; g__Roseburia; s__	0.006 ± 0.003	0.002 ± 0.001	x	x
4355971	k__Bacteria; p__Firmicutes; c__Clostridia; o__Clostridiales; f__; g__; s__	0.227 ± 0.156	0.581 ± 0.234	x	x
4433823	k__Bacteria; p__Bacteroidetes; c__Bacteroidia; o__Bacteroidales; f__Bacteroidaceae; g__Bacteroides; s__fragilis	0.087 ± 0.078	0.004 ± 0.004	x	x
2017729	k__Bacteria; p__Firmicutes; c__Clostridia; o__Clostridiales; f__Lachnospiraceae; g__; s__	0.013 ± 0.011	0.001 ± 0.001	x	x
183932	k__Bacteria; p__Firmicutes; c__Clostridia; o__Clostridiales; f__Ruminococcaceae; g__; s__	0.003 ± 0.002	0 ± 0	x	x
233953	k__Bacteria; p__Firmicutes; c__Erysipelotrichi; o__Erysipelotrichales; f__Erysipelotrichaceae; g__Coprobacillus; s__	0.002 ± 0.002	0.009 ± 0.005	x	x
182289	k__Bacteria; p__Firmicutes; c__Clostridia; o__Clostridiales; f__Lachnospiraceae; g__Coprococcus; s__	0.003 ± 0.001	0.006 ± 0.001	x	x
189698	k__Bacteria; p__Firmicutes; c__Clostridia; o__Clostridiales; f__Lachnospiraceae; g__Blautia; s__	0.007 ± 0.006	0.001 ± 0.001	x	x
271013	k__Bacteria; p__Firmicutes; c__Clostridia; o__Clostridiales; f__; g__; s__	0.006 ± 0.003	0.002 ± 0.001	x	x
368486	k__Bacteria; p__Firmicutes; c__Erysipelotrichi; o__Erysipelotrichales; f__Erysipelotrichaceae; g__[Eubacterium]; s__dolichum	0.05 ± 0.047	0.001 ± 0.001	x	x
184525	k__Bacteria; p__Firmicutes; c__Clostridia; o__Clostridiales; f__Lachnospiraceae; g__Coprococcus; s__	0.006 ± 0.003	0.012 ± 0.004	x	x
1788776	k__Bacteria; p__Firmicutes; c__Clostridia; o__Clostridiales; f__Clostridiaceae; g__; s__	0.001 ± 0.001	0.002 ± 0.001	x	x
194001	k__Bacteria; p__Firmicutes; c__Clostridia; o__Clostridiales; f__Lachnospiraceae; g__Coprococcus; s__	0.013 ± 0.004	0.007 ± 0.003	x	x
316675	k__Bacteria; p__Firmicutes; c__Clostridia; o__Clostridiales; f__Peptostreptococcaceae; g__; s__	0.058 ± 0.023	0.026 ± 0.011	x	x
186168	k__Bacteria; p__Firmicutes; c__Clostridia; o__Clostridiales; f__Ruminococcaceae; g__; s__	0.001 ± 0	0.001 ± 0.001	x	x
190991	k__Bacteria; p__Firmicutes; c__Clostridia; o__Clostridiales; f__Lachnospiraceae; g__Blautia; s__	0.001 ± 0	0.001 ± 0.001	x	x
318760	k__Bacteria; p__Firmicutes; c__Clostridia; o__Clostridiales; f__Lachnospiraceae; g__Blautia; s__	0.001 ± 0	0.001 ± 0.001	x	x
351292	k__Bacteria; p__Bacteroidetes; c__Bacteroidia; o__Bacteroidales; f__Bacteroidaceae; g__Bacteroides; s__	0.019 ± 0.018	0 ± 0	x	x
358798	k__Bacteria; p__Firmicutes; c__Clostridia; o__Clostridiales; f__Lachnospiraceae; g__Blautia; s__	0.081 ± 0.042	0.026 ± 0.021	x	x
4358723	k__Bacteria; p__Bacteroidetes; c__Bacteroidia; o__Bacteroidales; f__Bacteroidaceae; g__Bacteroides; s__	0.3 ± 0.189	0.023 ± 0.014	x	x
113909	k__Bacteria; p__Firmicutes; c__Clostridia; o__Clostridiales; f__; g__; s__	0.038 ± 0.032	0.003 ± 0.002	x	x
188918	k__Bacteria; p__Firmicutes; c__Clostridia; o__Clostridiales; f__Lachnospiraceae; g__Coprococcus; s__	0.003 ± 0.002	0.001 ± 0.001	x	x
183169	k__Bacteria; p__Firmicutes; c__Clostridia; o__Clostridiales; f__; g__; s__	0.002 ± 0.002	0.009 ± 0.005	x	x
194769	k__Bacteria; p__Firmicutes; c__Clostridia; o__Clostridiales; f__; g__; s__	0.002 ± 0.001	0.003 ± 0.001	x	x
86170	k__Bacteria; p__Firmicutes; c__Clostridia; o__Clostridiales; f__Ruminococcaceae; g__Faecalibacterium; s__prausnitzii	0.001 ± 0.001	0 ± 0	x	x
177001	k__Bacteria; p__Firmicutes; c__Clostridia; o__Clostridiales; f__Lachnospiraceae; g__; s__	0.001 ± 0.001	0 ± 0	x	x
177042	k__Bacteria; p__Firmicutes; c__Clostridia; o__Clostridiales; f__; g__; s__	0.001 ± 0.001	0 ± 0	x	x
189960	k__Bacteria; p__Bacteroidetes; c__Bacteroidia; o__Bacteroidales; f__[Barnesiellaceae]; g__; s__	0.001 ± 0.001	0 ± 0	x	x
191276	k__Bacteria; p__Firmicutes; c__Clostridia; o__Clostridiales; f__; g__; s__	0.001 ± 0.001	0 ± 0	x	x
195404	k__Bacteria; p__Firmicutes; c__Clostridia; o__Clostridiales; f__Lachnospiraceae; g__; s__	0.001 ± 0	0 ± 0	x	x
198542	k__Bacteria; p__Firmicutes; c__Clostridia; o__Clostridiales; f__Lachnospiraceae; g__Roseburia; s__	0.001 ± 0.001	0 ± 0	x	x
305494	k__Bacteria; p__Firmicutes; c__Clostridia; o__Clostridiales; f__; g__; s__	0.001 ± 0.001	0 ± 0	x	x
369637	k__Bacteria; p__Firmicutes; c__Clostridia; o__Clostridiales; f__Ruminococcaceae; g__; s__	0.001 ± 0.001	0 ± 0	x	x
3647536	k__Bacteria; p__Firmicutes; c__Clostridia; o__Clostridiales; f__Lachnospiraceae; g__[Ruminococcus]; s__gnavus	0.001 ± 0	0 ± 0	x	x
3678349	k__Bacteria; p__Firmicutes; c__Bacilli; o__Lactobacillales; f__Streptococcaceae; g__Streptococcus; s__	0.001 ± 0.001	0 ± 0	x	x
4297332	k__Bacteria; p__Proteobacteria; c__Betaproteobacteria; o__Neisseriales; f__Neisseriaceae; g__Neisseria; s__	0.001 ± 0.001	0 ± 0	x	x
4380813	k__Bacteria; p__Firmicutes; c__Clostridia; o__Clostridiales; f__Lachnospiraceae; g__Roseburia; s__	0.001 ± 0	0 ± 0	x	x
4484034	k__Bacteria; p__Bacteroidetes; c__Bacteroidia; o__Bacteroidales; f__Bacteroidaceae; g__Bacteroides; s__	0.001 ± 0.001	0 ± 0	x	x
176450	k__Bacteria; p__Firmicutes; c__Clostridia; o__Clostridiales; f__Lachnospiraceae; g__Blautia; s__	0.001 ± 0	0.002 ± 0.001	x	x
188079	k__Bacteria; p__Firmicutes; c__Clostridia; o__Clostridiales; f__Lachnospiraceae; g__Coprococcus; s__	0.065 ± 0.034	0.021 ± 0.014	x	x
326569	k__Bacteria; p__Firmicutes; c__Clostridia; o__Clostridiales; f__Clostridiaceae; g__; s__	0.01 ± 0.005	0.042 ± 0.026	x	x
2688035	k__Bacteria; p__Firmicutes; c__Clostridia; o__Clostridiales; f__Lachnospiraceae; g__; s__	0.003 ± 0.002	0.001 ± 0.001	x	x
174654	k__Bacteria; p__Firmicutes; c__Clostridia; o__Clostridiales; f__Ruminococcaceae; g__Ruminococcus; s__bromii	0.196 ± 0.161	1.138 ± 0.791	x	x
174792	k__Bacteria; p__Firmicutes; c__Clostridia; o__Clostridiales; f__Lachnospiraceae; g__; s__	0.032 ± 0.023	0.006 ± 0.004	x	x
368203	k__Bacteria; p__Firmicutes; c__Clostridia; o__Clostridiales; f__; g__; s__	0.001 ± 0.001	0.002 ± 0.001	x	x
842594	k__Bacteria; p__Firmicutes; c__Clostridia; o__Clostridiales; f__Lachnospiraceae; g__; s__	0.006 ± 0.005	0 ± 0	x	x
4436046	k__Bacteria; p__Firmicutes; c__Clostridia; o__Clostridiales; f__Lachnospiraceae; g__Dorea; s__	0.191 ± 0.102	0.057 ± 0.039	x	x
329313	k__Bacteria; p__Firmicutes; c__Clostridia; o__Clostridiales; f__Lachnospiraceae; g__; s__	0.004 ± 0.003	0 ± 0	x	x
184342	k__Bacteria; p__Firmicutes; c__Clostridia; o__Clostridiales; f__Lachnospiraceae; g__; s__	0.006 ± 0.004	0.001 ± 0	x	x
851938	k__Bacteria; p__Firmicutes; c__Erysipelotrichi; o__Erysipelotrichales; f__Erysipelotrichaceae; g__Bulleidia; s__moorei	0.002 ± 0.002	0.005 ± 0.002	x	x
186624	k__Bacteria; p__Firmicutes; c__Clostridia; o__Clostridiales; f__Lachnospiraceae; g__Roseburia; s__	0.002 ± 0.001	0.001 ± 0	x	x
179864	k__Bacteria; p__Firmicutes; c__Clostridia; o__Clostridiales; f__Ruminococcaceae; g__; s__	0.004 ± 0.004	0 ± 0	x	x
238803	k__Bacteria; p__Firmicutes; c__Clostridia; o__Clostridiales; f__Lachnospiraceae; g__; s__	0.004 ± 0.003	0 ± 0	x	x
176327	k__Bacteria; p__Firmicutes; c__Clostridia; o__Clostridiales; f__Lachnospiraceae; g__Blautia; s__	0.021 ± 0.012	0.006 ± 0.002	x	x
518438	k__Bacteria; p__Firmicutes; c__Clostridia; o__Clostridiales; f__Lachnospiraceae; g__; s__	0.419 ± 0.221	0.128 ± 0.068	x	x
988375	k__Bacteria; p__Bacteroidetes; c__Bacteroidia; o__Bacteroidales; f__[Odoribacteraceae]; g__Butyricimonas; s__	0.021 ± 0.017	0.001 ± 0.001	x	x
15076	k__Bacteria; p__Firmicutes; c__Bacilli; o__Lactobacillales; f__Aerococcaceae; g__Aerococcus; s__	0 ± 0	0 ± 0	x	x
161169	k__Bacteria; p__Proteobacteria; c__Gammaproteobacteria; o__Pseudomonadales; f__Pseudomonadaceae; g__; s__	0 ± 0	0 ± 0	x	x
173811	k__Bacteria; p__Firmicutes; c__Clostridia; o__Clostridiales; f__Lachnospiraceae; g__; s__	0 ± 0	0 ± 0	x	x
173945	k__Bacteria; p__Firmicutes; c__Clostridia; o__Clostridiales; f__Lachnospiraceae; g__Dorea; s__formicigenerans	0 ± 0	0 ± 0	x	x
175391	k__Bacteria; p__Firmicutes; c__Clostridia; o__Clostridiales; f__Lachnospiraceae; g__Blautia; s__	0 ± 0	0 ± 0	x	x
176008	k__Bacteria; p__Firmicutes; c__Clostridia; o__Clostridiales; f__Lachnospiraceae; g__Blautia; s__	0 ± 0	0 ± 0	x	x
176726	k__Bacteria; p__Firmicutes; c__Clostridia; o__Clostridiales; f__Lachnospiraceae; g__; s__	0 ± 0	0 ± 0	x	x
177884	k__Bacteria; p__Firmicutes; c__Clostridia; o__Clostridiales; f__Lachnospiraceae; g__Blautia; s__	0 ± 0	0 ± 0	x	x
177893	k__Bacteria; p__Firmicutes; c__Clostridia; o__Clostridiales; f__Ruminococcaceae; g__; s__	0 ± 0	0 ± 0	x	x
178146	k__Bacteria; p__Firmicutes; c__Clostridia; o__Clostridiales; f__Lachnospiraceae; g__Coprococcus; s__	0 ± 0	0 ± 0	x	x
178206	k__Bacteria; p__Firmicutes; c__Clostridia; o__Clostridiales; f__Lachnospiraceae; g__Dorea; s__	0 ± 0	0 ± 0	x	x
182142	k__Bacteria; p__Firmicutes; c__Clostridia; o__Clostridiales; f__Ruminococcaceae; g__; s__	0 ± 0	0 ± 0	x	x
184021	k__Bacteria; p__Firmicutes; c__Clostridia; o__Clostridiales; f__Lachnospiraceae; g__; s__	0 ± 0	0 ± 0	x	x
184309	k__Bacteria; p__Firmicutes; c__Clostridia; o__Clostridiales; f__Ruminococcaceae; g__; s__	0 ± 0	0 ± 0	x	x
185148	k__Bacteria; p__Firmicutes; c__Clostridia; o__Clostridiales; f__Lachnospiraceae; g__Blautia; s__obeum	0 ± 0	0 ± 0	x	x
190154	k__Bacteria; p__Firmicutes; c__Clostridia; o__Clostridiales; f__Lachnospiraceae; g__; s__	0 ± 0	0 ± 0	x	x
191113	k__Bacteria; p__Firmicutes; c__Clostridia; o__Clostridiales; f__Lachnospiraceae; g__Blautia; s__	0 ± 0	0 ± 0	x	x
191975	k__Bacteria; p__Firmicutes; c__Clostridia; o__Clostridiales; f__Eubacteriaceae; g__Pseudoramibacter_Eubacterium; s__	0 ± 0	0 ± 0	x	x
193850	k__Bacteria; p__Firmicutes; c__Clostridia; o__Clostridiales; f__Ruminococcaceae; g__; s__	0 ± 0	0 ± 0	x	x
194077	k__Bacteria; p__Firmicutes; c__Clostridia; o__Clostridiales; f__Lachnospiraceae; g__[Ruminococcus]; s__	0 ± 0	0 ± 0	x	x
195415	k__Bacteria; p__Firmicutes; c__Clostridia; o__Clostridiales; f__Ruminococcaceae; g__; s__	0 ± 0	0 ± 0	x	x
211212	k__Bacteria; p__Firmicutes; c__Clostridia; o__Clostridiales; f__Lachnospiraceae; g__; s__	0 ± 0	0 ± 0	x	x
234121	k__Bacteria; p__Firmicutes; c__Clostridia; o__Clostridiales; f__; g__; s__	0 ± 0	0 ± 0	x	x
255732	k__Bacteria; p__Actinobacteria; c__Actinobacteria; o__Actinomycetales; f__Micrococcaceae; g__Kocuria; s__rhizophila	0 ± 0	0 ± 0	x	x
260679	k__Bacteria; p__Firmicutes; c__Clostridia; o__Clostridiales; f__; g__; s__	0 ± 0	0 ± 0	x	x
270659	k__Bacteria; p__Proteobacteria; c__Gammaproteobacteria; o__Pseudomonadales; f__Moraxellaceae; g__Acinetobacter; s__	0 ± 0	0 ± 0	x	x
289373	k__Bacteria; p__Firmicutes; c__Clostridia; o__Clostridiales; f__Clostridiaceae; g__SMB53; s__	0 ± 0	0 ± 0	x	x
290468	k__Bacteria; p__Firmicutes; c__Clostridia; o__Clostridiales; f__Lachnospiraceae; g__Dorea; s__	0 ± 0	0 ± 0	x	x
300829	k__Bacteria; p__Firmicutes; c__Clostridia; o__Clostridiales; f__Clostridiaceae; g__Clostridium; s__	0 ± 0	0 ± 0	x	x
301921	k__Bacteria; p__Firmicutes; c__Bacilli; o__Lactobacillales; f__; g__; s__	0 ± 0	0 ± 0	x	x
310071	k__Bacteria; p__Firmicutes; c__Clostridia; o__Clostridiales; f__Lachnospiraceae; g__Blautia; s__	0 ± 0	0 ± 0	x	x
310751	k__Bacteria; p__Firmicutes; c__Clostridia; o__Clostridiales; f__; g__; s__	0 ± 0	0 ± 0	x	x
315348	k__Bacteria; p__Firmicutes; c__Clostridia; o__Clostridiales; f__; g__; s__	0 ± 0	0 ± 0	x	x
315958	k__Bacteria; p__Firmicutes; c__Clostridia; o__Clostridiales; f__Lachnospiraceae; g__Blautia; s__	0 ± 0	0 ± 0	x	x
329688	k__Bacteria; p__Actinobacteria; c__Coriobacteriia; o__Coriobacteriales; f__Coriobacteriaceae; g__Collinsella; s__stercoris	0 ± 0	0 ± 0	x	x
331150	k__Bacteria; p__Firmicutes; c__Clostridia; o__Clostridiales; f__Lachnospiraceae; g__; s__	0 ± 0	0 ± 0	x	x
331881	k__Bacteria; p__Firmicutes; c__Clostridia; o__Clostridiales; f__Clostridiaceae; g__; s__	0 ± 0	0 ± 0	x	x
342380	k__Bacteria; p__Firmicutes; c__Clostridia; o__Clostridiales; f__Lachnospiraceae; g__Blautia; s__	0 ± 0	0 ± 0	x	x
355269	k__Bacteria; p__Firmicutes; c__Clostridia; o__Clostridiales; f__Clostridiaceae; g__; s__	0 ± 0	0 ± 0	x	x
360825	k__Bacteria; p__Firmicutes; c__Clostridia; o__Clostridiales; f__; g__; s__	0 ± 0	0 ± 0	x	x
361702	k__Bacteria; p__Firmicutes; c__Clostridia; o__Clostridiales; f__Ruminococcaceae; g__Ruminococcus; s__	0 ± 0	0 ± 0	x	x
365574	k__Bacteria; p__Firmicutes; c__Clostridia; o__Clostridiales; f__Lachnospiraceae; g__Blautia; s__	0 ± 0	0 ± 0	x	x
368025	k__Bacteria; p__Firmicutes; c__Clostridia; o__Clostridiales; f__; g__; s__	0 ± 0	0 ± 0	x	x
415315	k__Bacteria; p__Actinobacteria; c__Coriobacteriia; o__Coriobacteriales; f__Coriobacteriaceae; g__Collinsella; s__	0 ± 0	0 ± 0	x	x
493391	k__Bacteria; p__Firmicutes; c__Erysipelotrichi; o__Erysipelotrichales; f__Erysipelotrichaceae; g__[Eubacterium]; s__dolichum	0 ± 0	0 ± 0	x	x
521795	k__Bacteria; p__Firmicutes; c__Clostridia; o__Clostridiales; f__[Tissierellaceae]; g__Peptoniphilus; s__	0 ± 0	0 ± 0	x	x
532232	k__Bacteria; p__Firmicutes; c__Bacilli; o__Lactobacillales; f__Streptococcaceae; g__Streptococcus; s__	0 ± 0	0 ± 0	x	x
579851	k__Bacteria; p__Firmicutes; c__Erysipelotrichi; o__Erysipelotrichales; f__Erysipelotrichaceae; g__[Eubacterium]; s__dolichum	0 ± 0	0 ± 0	x	x
583134	k__Bacteria; p__Firmicutes; c__Clostridia; o__Clostridiales; f__Ruminococcaceae; g__; s__	0 ± 0	0 ± 0	x	x
714766	k__Bacteria; p__Firmicutes; c__Clostridia; o__Clostridiales; f__Lachnospiraceae; g__Moryella; s__	0 ± 0	0 ± 0	x	x
817926	k__Bacteria; p__Proteobacteria; c__Gammaproteobacteria; o__Xanthomonadales; f__Xanthomonadaceae; g__; s__	0 ± 0	0 ± 0	x	x
1521602	k__Bacteria; p__Firmicutes; c__Clostridia; o__Clostridiales; f__Clostridiaceae; g__; s__	0 ± 0	0 ± 0	x	x
2399341	k__Bacteria; p__Firmicutes; c__Clostridia; o__Clostridiales; f__Lachnospiraceae; g__Blautia; s__producta	0 ± 0	0 ± 0	x	x
4316928	k__Bacteria; p__Firmicutes; c__Bacilli; o__Lactobacillales; f__Enterococcaceae; g__Enterococcus; s__	0 ± 0	0 ± 0	x	x
4342860	k__Bacteria; p__Firmicutes; c__Bacilli; o__Gemellales; f__Gemellaceae; g__Gemella; s__	0 ± 0	0 ± 0	x	x
4344371	k__Bacteria; p__Proteobacteria; c__Alphaproteobacteria; o__Sphingomonadales; f__Sphingomonadaceae; g__Sphingomonas; s__	0 ± 0	0 ± 0	x	x
4366889	k__Bacteria; p__Firmicutes; c__Bacilli; o__Lactobacillales; f__Streptococcaceae; g__Streptococcus; s__	0 ± 0	0 ± 0	x	x
4378477	k__Bacteria; p__Proteobacteria; c__Gammaproteobacteria; o__Alteromonadales; f__Shewanellaceae; g__Shewanella; s__	0 ± 0	0 ± 0	x	x
4379449	k__Bacteria; p__Firmicutes; c__Erysipelotrichi; o__Erysipelotrichales; f__Erysipelotrichaceae; g__; s__	0 ± 0	0 ± 0	x	x
4396250	k__Bacteria; p__Firmicutes; c__Clostridia; o__Clostridiales; f__Ruminococcaceae; g__; s__	0 ± 0	0 ± 0	x	x
4437024	k__Bacteria; p__Firmicutes; c__Bacilli; o__Lactobacillales; f__Streptococcaceae; g__Streptococcus; s__	0 ± 0	0 ± 0	x	x
4438166	k__Bacteria; p__Firmicutes; c__Bacilli; o__Lactobacillales; f__Streptococcaceae; g__Streptococcus; s__	0 ± 0	0 ± 0	x	x
4479392	k__Bacteria; p__Firmicutes; c__Clostridia; o__Clostridiales; f__Clostridiaceae; g__; s__	0 ± 0	0 ± 0	x	x
4479989	k__Bacteria; p__Firmicutes; c__Bacilli; o__Lactobacillales; f__Streptococcaceae; g__Streptococcus; s__	0 ± 0	0 ± 0	x	x
178766	k__Bacteria; p__Firmicutes; c__Clostridia; o__Clostridiales; f__Lachnospiraceae; g__Roseburia; s__	0.049 ± 0.033	0.005 ± 0.002	x	x
4371957	k__Bacteria; p__Firmicutes; c__Clostridia; o__Clostridiales; f__; g__; s__	0.009 ± 0.005	0.02 ± 0.007	x	x
2532173	k__Bacteria; p__Firmicutes; c__Clostridia; o__Clostridiales; f__Lachnospiraceae; g__Roseburia; s__faecis	0.026 ± 0.022	0.001 ± 0.001	x	x
174924	k__Bacteria; p__Firmicutes; c__Clostridia; o__Clostridiales; f__Ruminococcaceae; g__Ruminococcus; s__	0.248 ± 0.197	0.02 ± 0.011	x	x
179593	k__Bacteria; p__Firmicutes; c__Clostridia; o__Clostridiales; f__Lachnospiraceae; g__Blautia; s__	0.016 ± 0.01	0.032 ± 0.009	x	x
181047	k__Bacteria; p__Firmicutes; c__Clostridia; o__Clostridiales; f__Lachnospiraceae; g__Coprococcus; s__	0.003 ± 0.002	0.001 ± 0	x	x
2497335	k__Bacteria; p__Bacteroidetes; c__Bacteroidia; o__Bacteroidales; f__Porphyromonadaceae; g__Parabacteroides; s__distasonis	0.059 ± 0.045	0.002 ± 0.001	x	x
176157	k__Bacteria; p__Firmicutes; c__Clostridia; o__Clostridiales; f__Lachnospiraceae; g__Blautia; s__	0.002 ± 0.001	0.001 ± 0	x	x
178675	k__Bacteria; p__Firmicutes; c__Clostridia; o__Clostridiales; f__Ruminococcaceae; g__; s__	0.002 ± 0.001	0.001 ± 0	x	x
182075	k__Bacteria; p__Firmicutes; c__Clostridia; o__Clostridiales; f__Lachnospiraceae; g__; s__	0.002 ± 0.001	0.001 ± 0	x	x
185141	k__Bacteria; p__Firmicutes; c__Clostridia; o__Clostridiales; f__Ruminococcaceae; g__; s__	0.002 ± 0.001	0.001 ± 0	x	x
187780	k__Bacteria; p__Firmicutes; c__Clostridia; o__Clostridiales; f__Ruminococcaceae; g__; s__	0.002 ± 0.001	0.001 ± 0.001	x	x
191395	k__Bacteria; p__Firmicutes; c__Clostridia; o__Clostridiales; f__Lachnospiraceae; g__Blautia; s__	0.002 ± 0.001	0.001 ± 0.001	x	x
192444	k__Bacteria; p__Firmicutes; c__Clostridia; o__Clostridiales; f__Lachnospiraceae; g__; s__	0.002 ± 0.001	0.001 ± 0	x	x
183439	k__Bacteria; p__Firmicutes; c__Clostridia; o__Clostridiales; f__Ruminococcaceae; g__; s__	0.044 ± 0.031	0.001 ± 0.001	x	x
295146	k__Bacteria; p__Firmicutes; c__Bacilli; o__Lactobacillales; f__Enterococcaceae; g__Enterococcus; s__	0.001 ± 0.001	0.009 ± 0.006	x	x
181336	k__Bacteria; p__Firmicutes; c__Clostridia; o__Clostridiales; f__; g__; s__	0.025 ± 0.012	0.01 ± 0.004	x	x
2223978	k__Bacteria; p__Firmicutes; c__Clostridia; o__Clostridiales; f__Ruminococcaceae; g__; s__	0.067 ± 0.037	0.024 ± 0.009	x	x
193876	k__Bacteria; p__Firmicutes; c__Clostridia; o__Clostridiales; f__Lachnospiraceae; g__Dorea; s__	0.073 ± 0.036	0.024 ± 0.019	x	x
1141758	k__Bacteria; p__Cyanobacteria; c__Chloroplast; o__Streptophyta; f__; g__; s__	0 ± 0	0.003 ± 0.002	x	x
4431803	k__Bacteria; p__Cyanobacteria; c__Chloroplast; o__Streptophyta; f__; g__; s__	0.006 ± 0.006	0.09 ± 0.059	x	x
236734	k__Bacteria; p__Firmicutes; c__Clostridia; o__Clostridiales; f__Clostridiaceae; g__; s__	0.001 ± 0.001	0.003 ± 0.002	x	x
839610	k__Bacteria; p__Firmicutes; c__Clostridia; o__Clostridiales; f__Ruminococcaceae; g__; s__	0.002 ± 0.002	0 ± 0	x	x
105287	k__Bacteria; p__Firmicutes; c__Clostridia; o__Clostridiales; f__Ruminococcaceae; g__; s__	0.003 ± 0.002	0.001 ± 0.001	x	x
188213	k__Bacteria; p__Firmicutes; c__Clostridia; o__Clostridiales; f__Lachnospiraceae; g__; s__	0.165 ± 0.091	0.298 ± 0.075	x	x
302746	k__Bacteria; p__Firmicutes; c__Clostridia; o__Clostridiales; f__Lachnospiraceae; g__; s__	0.005 ± 0.003	0.002 ± 0.001	x	x
188990	k__Bacteria; p__Firmicutes; c__Clostridia; o__Clostridiales; f__Lachnospiraceae; g__; s__	0.014 ± 0.007	0.025 ± 0.007	x	x
4431292	k__Bacteria; p__Firmicutes; c__Clostridia; o__Clostridiales; f__Ruminococcaceae; g__Oscillospira; s__	0.008 ± 0.007	0 ± 0	x	x
191803	k__Bacteria; p__Firmicutes; c__Clostridia; o__Clostridiales; f__Clostridiaceae; g__; s__	0.033 ± 0.011	0.073 ± 0.032	x	x
199286	k__Bacteria; p__Firmicutes; c__Clostridia; o__Clostridiales; f__; g__; s__	0.018 ± 0.013	0.004 ± 0.003	x	x
819353	k__Bacteria; p__Firmicutes; c__Clostridia; o__Clostridiales; f__Ruminococcaceae; g__; s__	0.393 ± 0.272	0.078 ± 0.076	x	x
3302039	k__Bacteria; p__Firmicutes; c__Clostridia; o__Clostridiales; f__Ruminococcaceae; g__Oscillospira; s__	0.003 ± 0.003	0 ± 0	x	x
4449236	k__Bacteria; p__Proteobacteria; c__Betaproteobacteria; o__Burkholderiales; f__Alcaligenaceae; g__Sutterella; s__	0.257 ± 0.244	0.008 ± 0.006	x	x
4478992	k__Bacteria; p__Firmicutes; c__Clostridia; o__Clostridiales; f__Clostridiaceae; g__; s__	0.001 ± 0.001	0.006 ± 0.003	x	x
3794053	k__Bacteria; p__Firmicutes; c__Clostridia; o__Clostridiales; f__Lachnospiraceae; g__Dorea; s__	0.003 ± 0.001	0.001 ± 0.001	x	x
4363066	k__Bacteria; p__Proteobacteria; c__Gammaproteobacteria; o__Pasteurellales; f__Pasteurellaceae; g__Aggregatibacter; s__	0.009 ± 0.007	0.001 ± 0	x	x
190171	k__Bacteria; p__Firmicutes; c__Clostridia; o__Clostridiales; f__Ruminococcaceae; g__; s__	0.044 ± 0.021	0.02 ± 0.007	x	x
1924689	k__Bacteria; p__Firmicutes; c__Clostridia; o__Clostridiales; f__Clostridiaceae; g__02d06; s__	0 ± 0	0.004 ± 0.003	x	x
198190	k__Bacteria; p__Bacteroidetes; c__Bacteroidia; o__Bacteroidales; f__Porphyromonadaceae; g__Parabacteroides; s__distasonis	0.032 ± 0.029	0.002 ± 0.002	x	x
814442	k__Bacteria; p__Proteobacteria; c__Gammaproteobacteria; o__Enterobacteriales; f__Enterobacteriaceae; g__; s__	0.001 ± 0.001	0.004 ± 0.002	x	x
2829179	k__Bacteria; p__Firmicutes; c__Clostridia; o__Clostridiales; f__Veillonellaceae; g__Acidaminococcus; s__	0.027 ± 0.024	0.001 ± 0.001	x	x
176806	k__Bacteria; p__Firmicutes; c__Clostridia; o__Clostridiales; f__Lachnospiraceae; g__; s__	0.004 ± 0.003	0.001 ± 0	x	x
174439	k__Bacteria; p__Firmicutes; c__Clostridia; o__Clostridiales; f__Ruminococcaceae; g__Faecalibacterium; s__prausnitzii	0.009 ± 0.004	0.004 ± 0.003	x	x
199070	k__Bacteria; p__Firmicutes; c__Clostridia; o__Clostridiales; f__; g__; s__	0.002 ± 0.001	0.001 ± 0.001	x	x
3865949	k__Bacteria; p__Firmicutes; c__Clostridia; o__Clostridiales; f__; g__; s__	0.039 ± 0.034	0.001 ± 0.001	x	x
191755	k__Bacteria; p__Firmicutes; c__Clostridia; o__Clostridiales; f__Lachnospiraceae; g__[Ruminococcus]; s__gnavus	0.005 ± 0.002	0.002 ± 0.001	x	x
178738	k__Bacteria; p__Firmicutes; c__Clostridia; o__Clostridiales; f__Clostridiaceae; g__; s__	0.001 ± 0	0.002 ± 0.001	x	x
188165	k__Bacteria; p__Firmicutes; c__Clostridia; o__Clostridiales; f__Lachnospiraceae; g__; s__	0.001 ± 0.001	0.002 ± 0.001	x	x
191399	k__Bacteria; p__Firmicutes; c__Clostridia; o__Clostridiales; f__Ruminococcaceae; g__; s__	0.001 ± 0	0.002 ± 0.001	x	x
145801	k__Bacteria; p__Firmicutes; c__Erysipelotrichi; o__Erysipelotrichales; f__Erysipelotrichaceae; g__; s__	0.125 ± 0.076	0.244 ± 0.082	x	x
315463	k__Bacteria; p__Firmicutes; c__Clostridia; o__Clostridiales; f__Ruminococcaceae; g__; s__	0.001 ± 0.001	0.003 ± 0.002	x	x
2339949	k__Bacteria; p__Firmicutes; c__Clostridia; o__Clostridiales; f__Lachnospiraceae; g__[Ruminococcus]; s__gnavus	0.004 ± 0.002	0.001 ± 0.001	x	x
3474081	k__Bacteria; p__Bacteroidetes; c__Bacteroidia; o__Bacteroidales; f__Bacteroidaceae; g__Bacteroides; s__fragilis	0.2 ± 0.158	0.021 ± 0.01	x	x
180516	k__Bacteria; p__Firmicutes; c__Clostridia; o__Clostridiales; f__Clostridiaceae; g__; s__	0.007 ± 0.002	0.015 ± 0.006	x	x
194512	k__Bacteria; p__Firmicutes; c__Clostridia; o__Clostridiales; f__Lachnospiraceae; g__; s__	0.003 ± 0.001	0.001 ± 0.001	x	x
299302	k__Bacteria; p__Firmicutes; c__Clostridia; o__Clostridiales; f__Lachnospiraceae; g__Blautia; s__	0.003 ± 0.001	0.005 ± 0.002	x	x
184980	k__Bacteria; p__Firmicutes; c__Clostridia; o__Clostridiales; f__Ruminococcaceae; g__; s__	0.002 ± 0.001	0.001 ± 0.001	x	x
162623	k__Bacteria; p__Firmicutes; c__Clostridia; o__Clostridiales; f__Lachnospiraceae; g__Roseburia; s__	0.008 ± 0.006	0.001 ± 0.001	x	x
187199	k__Bacteria; p__Firmicutes; c__Clostridia; o__Clostridiales; f__; g__; s__	0.036 ± 0.022	0.005 ± 0.002	x	x
367213	k__Bacteria; p__Firmicutes; c__Clostridia; o__Clostridiales; f__Ruminococcaceae; g__; s__	0.004 ± 0.002	0.001 ± 0.001	x	x
370099	k__Bacteria; p__Firmicutes; c__Erysipelotrichi; o__Erysipelotrichales; f__Erysipelotrichaceae; g__; s__	0.007 ± 0.004	0.003 ± 0.001	x	x
2996838	k__Bacteria; p__Firmicutes; c__Clostridia; o__Clostridiales; f__; g__; s__	0.004 ± 0.003	0.001 ± 0.001	x	x
3318103	k__Bacteria; p__Firmicutes; c__Clostridia; o__Clostridiales; f__Lachnospiraceae; g__Roseburia; s__	0.012 ± 0.006	0.005 ± 0.003	x	x
4396656	k__Bacteria; p__Firmicutes; c__Clostridia; o__Clostridiales; f__Clostridiaceae; g__; s__	0.005 ± 0.003	0.017 ± 0.009	x	x
177040	k__Bacteria; p__Firmicutes; c__Clostridia; o__Clostridiales; f__Lachnospiraceae; g__; s__	0.002 ± 0.001	0.001 ± 0.001	x	x
248126	k__Bacteria; p__Firmicutes; c__Clostridia; o__Clostridiales; f__Peptostreptococcaceae; g__; s__	0.008 ± 0.003	0.018 ± 0.008	x	x
187998	k__Bacteria; p__Firmicutes; c__Clostridia; o__Clostridiales; f__Ruminococcaceae; g__; s__	0.038 ± 0.016	0.019 ± 0.007	x	x
4347568	k__Bacteria; p__Firmicutes; c__Clostridia; o__Clostridiales; f__Lachnospiraceae; g__Roseburia; s__faecis	0.034 ± 0.021	0.009 ± 0.004	x	x
4468461	k__Bacteria; p__Firmicutes; c__Clostridia; o__Clostridiales; f__Clostridiaceae; g__; s__	0.001 ± 0.001	0.004 ± 0.003	x	x
4478815	k__Bacteria; p__Firmicutes; c__Clostridia; o__Clostridiales; f__Lachnospiraceae; g__Coprococcus; s__	0.009 ± 0.004	0.005 ± 0.001	x	x
2683271	k__Bacteria; p__Firmicutes; c__Clostridia; o__Clostridiales; f__Lachnospiraceae; g__[Ruminococcus]; s__gnavus	0.015 ± 0.012	0.002 ± 0.001	x	x
208790	k__Bacteria; p__Firmicutes; c__Clostridia; o__Clostridiales; f__Lachnospiraceae; g__; s__	0.001 ± 0.001	0.003 ± 0.002	x	x
179583	k__Bacteria; p__Firmicutes; c__Clostridia; o__Clostridiales; f__Ruminococcaceae; g__; s__	0.005 ± 0.002	0.002 ± 0.001	x	x
184492	k__Bacteria; p__Firmicutes; c__Clostridia; o__Clostridiales; f__Lachnospiraceae; g__[Ruminococcus]; s__	0.001 ± 0	0.007 ± 0.005	x	x
190984	k__Bacteria; p__Firmicutes; c__Clostridia; o__Clostridiales; f__Lachnospiraceae; g__Coprococcus; s__	0.001 ± 0	0.002 ± 0.001	x	x
175485	k__Bacteria; p__Bacteroidetes; c__Bacteroidia; o__Bacteroidales; f__Bacteroidaceae; g__Bacteroides; s__	0.042 ± 0.034	0.001 ± 0	x	x
193240	k__Bacteria; p__Firmicutes; c__Clostridia; o__Clostridiales; f__Ruminococcaceae; g__; s__	0.046 ± 0.031	0.011 ± 0.006	x	x
174473	k__Bacteria; p__Firmicutes; c__Clostridia; o__Clostridiales; f__Lachnospiraceae; g__; s__	0.001 ± 0.001	0 ± 0	x	x
178994	k__Bacteria; p__Firmicutes; c__Clostridia; o__Clostridiales; f__Lachnospiraceae; g__Blautia; s__	0.001 ± 0.001	0 ± 0	x	x
186906	k__Bacteria; p__Firmicutes; c__Clostridia; o__Clostridiales; f__Lachnospiraceae; g__; s__	0.001 ± 0.001	0 ± 0	x	x
199036	k__Bacteria; p__Firmicutes; c__Clostridia; o__Clostridiales; f__; g__; s__	0.001 ± 0.001	0 ± 0	x	x
1682179	k__Bacteria; p__Firmicutes; c__Clostridia; o__Clostridiales; f__Lachnospiraceae; g__; s__	0.001 ± 0.001	0 ± 0	x	x
4290144	k__Bacteria; p__Firmicutes; c__Bacilli; o__Lactobacillales; f__Enterococcaceae; g__Enterococcus; s__	0.001 ± 0	0 ± 0	x	x
4359797	k__Bacteria; p__Firmicutes; c__Clostridia; o__Clostridiales; f__Lachnospiraceae; g__Blautia; s__	0.001 ± 0.001	0 ± 0	x	x
4426051	k__Bacteria; p__Firmicutes; c__Clostridia; o__Clostridiales; f__Lachnospiraceae; g__[Ruminococcus]; s__gnavus	0.001 ± 0.001	0 ± 0	x	x
177515	k__Bacteria; p__Firmicutes; c__Clostridia; o__Clostridiales; f__Lachnospiraceae; g__Roseburia; s__	0.004 ± 0.003	0.001 ± 0	x	x
196518	k__Bacteria; p__Firmicutes; c__Clostridia; o__Clostridiales; f__Ruminococcaceae; g__; s__	0.003 ± 0.001	0.006 ± 0.002	x	x
183708	k__Bacteria; p__Firmicutes; c__Clostridia; o__Clostridiales; f__Lachnospiraceae; g__Blautia; s__	0.003 ± 0.001	0.005 ± 0.002	x	x
187150	k__Bacteria; p__Firmicutes; c__Clostridia; o__Clostridiales; f__Ruminococcaceae; g__; s__	0.031 ± 0.016	0.014 ± 0.004	x	x
195086	k__Bacteria; p__Firmicutes; c__Clostridia; o__Clostridiales; f__Lachnospiraceae; g__Roseburia; s__	0.026 ± 0.016	0.007 ± 0.004	x	x
180983	k__Bacteria; p__Firmicutes; c__Clostridia; o__Clostridiales; f__Lachnospiraceae; g__; s__	0 ± 0	0.001 ± 0.001	x	x
190240	k__Bacteria; p__Firmicutes; c__Clostridia; o__Clostridiales; f__Lachnospiraceae; g__; s__	0 ± 0	0.001 ± 0.001	x	x
198689	k__Bacteria; p__Firmicutes; c__Clostridia; o__Clostridiales; f__; g__; s__	0 ± 0	0.001 ± 0.001	x	x
290647	k__Bacteria; p__Firmicutes; c__Clostridia; o__Clostridiales; f__Clostridiaceae; g__; s__	0 ± 0	0.001 ± 0.001	x	x
296052	k__Bacteria; p__Firmicutes; c__Clostridia; o__Clostridiales; f__Lachnospiraceae; g__; s__	0 ± 0	0.001 ± 0	x	x
367456	k__Bacteria; p__Firmicutes; c__Clostridia; o__Clostridiales; f__Lachnospiraceae; g__Blautia; s__	0 ± 0	0.001 ± 0.001	x	x
1887417	k__Bacteria; p__TM7; c__TM7-3; o__; f__; g__; s__	0 ± 0	0.001 ± 0.001	x	x
2658058	k__Bacteria; p__Firmicutes; c__Clostridia; o__Clostridiales; f__Peptostreptococcaceae; g__; s__	0 ± 0	0.001 ± 0	x	x
3385021	k__Bacteria; p__Firmicutes; c__Bacilli; o__Bacillales; f__Staphylococcaceae; g__Staphylococcus; s__epidermidis	0 ± 0	0.001 ± 0.001	x	x
182911	k__Bacteria; p__Firmicutes; c__Clostridia; o__Clostridiales; f__Ruminococcaceae; g__; s__	0.032 ± 0.021	0.009 ± 0.004	x	x
4316995	k__Bacteria; p__Firmicutes; c__Clostridia; o__Clostridiales; f__Lachnospiraceae; g__[Ruminococcus]; s__gnavus	0.001 ± 0.001	0.003 ± 0.001	x	x
4331723	k__Bacteria; p__Firmicutes; c__Clostridia; o__Clostridiales; f__Ruminococcaceae; g__Ruminococcus; s__	0.003 ± 0.001	0.001 ± 0.001	x	x
185312	k__Bacteria; p__Firmicutes; c__Clostridia; o__Clostridiales; f__Lachnospiraceae; g__Coprococcus; s__	0.016 ± 0.011	0.002 ± 0.001	x	x
2423305	k__Bacteria; p__Actinobacteria; c__Coriobacteriia; o__Coriobacteriales; f__Coriobacteriaceae; g__; s__	0 ± 0	0.007 ± 0.005	x	x
174885	k__Bacteria; p__Firmicutes; c__Clostridia; o__Clostridiales; f__Ruminococcaceae; g__; s__	0.007 ± 0.005	0 ± 0	x	x
177172	k__Bacteria; p__Firmicutes; c__Clostridia; o__Clostridiales; f__Lachnospiraceae; g__Coprococcus; s__	0.01 ± 0.003	0.006 ± 0.002	x	x
183145	k__Bacteria; p__Firmicutes; c__Clostridia; o__Clostridiales; f__Lachnospiraceae; g__Blautia; s__	0.014 ± 0.005	0.022 ± 0.005	x	x
186521	k__Bacteria; p__Firmicutes; c__Clostridia; o__Clostridiales; f__Ruminococcaceae; g__; s__	0.011 ± 0.004	0.007 ± 0.002	x	x
290281	k__Bacteria; p__Firmicutes; c__Clostridia; o__Clostridiales; f__Lachnospiraceae; g__; s__	0.002 ± 0.001	0.004 ± 0.001	x	x
4456142	k__Bacteria; p__Firmicutes; c__Clostridia; o__Clostridiales; f__Clostridiaceae; g__; s__	0 ± 0	0.003 ± 0.002	x	x
544859	k__Bacteria; p__Firmicutes; c__Clostridia; o__Clostridiales; f__Ruminococcaceae; g__; s__	0.008 ± 0.005	0.002 ± 0.001	x	x
194104	k__Bacteria; p__Firmicutes; c__Clostridia; o__Clostridiales; f__Lachnospiraceae; g__Coprococcus; s__	0.001 ± 0.001	0.002 ± 0.001	x	x
4095596	k__Bacteria; p__Proteobacteria; c__Betaproteobacteria; o__Burkholderiales; f__Alcaligenaceae; g__Sutterella; s__	0.073 ± 0.051	0.004 ± 0.003	x	x
174752	k__Bacteria; p__Firmicutes; c__Clostridia; o__Clostridiales; f__Ruminococcaceae; g__; s__	0.001 ± 0	0 ± 0	x	x
175509	k__Bacteria; p__Firmicutes; c__Clostridia; o__Clostridiales; f__Lachnospiraceae; g__Blautia; s__	0.001 ± 0	0 ± 0	x	x
177878	k__Bacteria; p__Firmicutes; c__Clostridia; o__Clostridiales; f__Ruminococcaceae; g__Faecalibacterium; s__prausnitzii	0.001 ± 0	0 ± 0	x	x
183224	k__Bacteria; p__Firmicutes; c__Clostridia; o__Clostridiales; f__; g__; s__	0.001 ± 0.001	0 ± 0	x	x
183804	k__Bacteria; p__Firmicutes; c__Clostridia; o__Clostridiales; f__Lachnospiraceae; g__; s__	0.001 ± 0	0 ± 0	x	x
184497	k__Bacteria; p__Firmicutes; c__Clostridia; o__Clostridiales; f__; g__; s__	0.001 ± 0	0 ± 0	x	x
185192	k__Bacteria; p__Firmicutes; c__Clostridia; o__Clostridiales; f__Lachnospiraceae; g__Roseburia; s__faecis	0.001 ± 0.001	0 ± 0	x	x
187051	k__Bacteria; p__Firmicutes; c__Clostridia; o__Clostridiales; f__; g__; s__	0.001 ± 0	0 ± 0	x	x
188054	k__Bacteria; p__Firmicutes; c__Clostridia; o__Clostridiales; f__Ruminococcaceae; g__; s__	0.001 ± 0	0 ± 0	x	x
189125	k__Bacteria; p__Firmicutes; c__Clostridia; o__Clostridiales; f__Lachnospiraceae; g__Blautia; s__	0.001 ± 0	0 ± 0	x	x
189403	k__Bacteria; p__Firmicutes; c__Clostridia; o__Clostridiales; f__Lachnospiraceae; g__[Ruminococcus]; s__gnavus	0.001 ± 0	0 ± 0	x	x
189445	k__Bacteria; p__Firmicutes; c__Clostridia; o__Clostridiales; f__Ruminococcaceae; g__; s__	0.001 ± 0	0 ± 0	x	x
191531	k__Bacteria; p__Firmicutes; c__Clostridia; o__Clostridiales; f__Lachnospiraceae; g__; s__	0.001 ± 0.001	0 ± 0	x	x
194258	k__Bacteria; p__Firmicutes; c__Clostridia; o__Clostridiales; f__Ruminococcaceae; g__Faecalibacterium; s__prausnitzii	0.001 ± 0	0 ± 0	x	x
194761	k__Bacteria; p__Firmicutes; c__Clostridia; o__Clostridiales; f__Lachnospiraceae; g__; s__	0.001 ± 0	0 ± 0	x	x
195843	k__Bacteria; p__Firmicutes; c__Clostridia; o__Clostridiales; f__Ruminococcaceae; g__; s__	0.001 ± 0.001	0 ± 0	x	x
[truncated: 2,134 more rows]

## Sheet: Table_S2
Table S2. Significant Nodes of co-occurrence analysis
Label	OTU_ID	Spingo Species Classification	Greengenes Classification	degree	is_a_feature	neg_degree	pos_degree	sample_count
Autism	-	-	-	53	yes	11	42	11
Butyrate	-	-	-	4	yes	0	4	25
OTU-A.defectiva	1076668	Abiotrophia_defectiva	k__Bacteria; p__Firmicutes; c__Bacilli; o__Lactobacillales; f__Aerococcaceae; g__; s__	9	no	4	5	19
OTU-A.hadrus-1	181853	Anaerostipes_hadrus	k__Bacteria; p__Firmicutes; c__Clostridia; o__Clostridiales; f__Lachnospiraceae; g__Coprococcus; s__	17	no	5	12	22
OTU-A.hadrus-2	183057	Anaerostipes_hadrus	k__Bacteria; p__Firmicutes; c__Clostridia; o__Clostridiales; f__Lachnospiraceae; g__Coprococcus; s__	19	no	6	13	20
OTU-A.hadrus-3	197603	Anaerostipes_hadrus	k__Bacteria; p__Firmicutes; c__Clostridia; o__Clostridiales; f__Lachnospiraceae; g__Coprococcus; s__	17	no	5	12	23
OTU-A.odontolyticus	1089121	Actinomyces_odontolyticus	k__Bacteria; p__Actinobacteria; c__Actinobacteria; o__Actinomycetales; f__Actinomycetaceae; g__Actinomyces; s__	13	no	1	12	17
OTU-B.caccae	198449	Bacteroides_caccae	k__Bacteria; p__Bacteroidetes; c__Bacteroidia; o__Bacteroidales; f__Bacteroidaceae; g__Bacteroides; s__	30	no	2	28	5
OTU-B.dorei	183496	Bacteroides_dorei	k__Bacteria; p__Bacteroidetes; c__Bacteroidia; o__Bacteroidales; f__Bacteroidaceae; g__Bacteroides; s__	19	no	1	18	7
OTU-B.fragilis	3472078	Bacteroides_fragilis	k__Bacteria; p__Bacteroidetes; c__Bacteroidia; o__Bacteroidales; f__Bacteroidaceae; g__Bacteroides; s__	34	no	3	31	6
OTU-B.longum	72820	Bifidobacterium_longum	k__Bacteria; p__Actinobacteria; c__Actinobacteria; o__Bifidobacteriales; f__Bifidobacteriaceae; g__Bifidobacterium; s__longum	20	no	16	4	25
OTU-B.luti-2	180633	Blautia_luti	k__Bacteria; p__Firmicutes; c__Clostridia; o__Clostridiales; f__Lachnospiraceae; g__Blautia; s__	3	no	0	3	24
OTU-B.luti-3	198584	Blautia_luti	k__Bacteria; p__Firmicutes; c__Clostridia; o__Clostridiales; f__Lachnospiraceae; g__Blautia; s__	13	no	1	12	23
OTU-B.stercoris	4428929	Bacteroides_stercoris	k__Bacteria; p__Bacteroidetes; c__Bacteroidia; o__Bacteroidales; f__Bacteroidaceae; g__Bacteroides; s__caccae	22	no	0	22	3
OTU-B.thetaiotaomicron	4354042	Bacteroides_thetaiotaomicron	k__Bacteria; p__Firmicutes; c__Bacilli; o__Lactobacillales; f__Streptococcaceae; g__Streptococcus; s__	31	no	15	16	18
OTU-B.uniformis-1	175535	Bacteroides_uniformis	k__Bacteria; p__Bacteroidetes; c__Bacteroidia; o__Bacteroidales; f__Bacteroidaceae; g__Bacteroides; s__	30	no	4	26	7
OTU-B.uniformis-2	190309	Bacteroides_uniformis	k__Bacteria; p__Bacteroidetes; c__Bacteroidia; o__Bacteroidales; f__Bacteroidaceae; g__Bacteroides; s__	44	no	7	37	8
OTU-B.uniformis-3	193233	Bacteroides_uniformis	k__Bacteria; p__Bacteroidetes; c__Bacteroidia; o__Bacteroidales; f__Bacteroidaceae; g__Bacteroides; s__	22	no	1	21	5
OTU-B.uniformis-4	2331530	Bacteroides_uniformis	k__Bacteria; p__Bacteroidetes; c__Bacteroidia; o__Bacteroidales; f__Bacteroidaceae; g__Bacteroides; s__	36	no	1	35	6
OTU-B.uniformis-5	3154070	Bacteroides_uniformis	k__Bacteria; p__Bacteroidetes; c__Bacteroidia; o__Bacteroidales; f__Bacteroidaceae; g__Bacteroides; s__	27	no	1	26	7
OTU-B.uniformis-6	3486634	Bacteroides_uniformis	k__Bacteria; p__Bacteroidetes; c__Bacteroidia; o__Bacteroidales; f__Bacteroidaceae; g__Bacteroides; s__	23	no	0	23	3
OTU-B.vulgatus-1	182052	Bacteroides_vulgatus	k__Bacteria; p__Bacteroidetes; c__Bacteroidia; o__Bacteroidales; f__Bacteroidaceae; g__Bacteroides; s__	22	no	0	22	3
OTU-B.vulgatus-2	183662	Bacteroides_vulgatus	k__Bacteria; p__Bacteroidetes; c__Bacteroidia; o__Bacteroidales; f__Bacteroidaceae; g__Bacteroides; s__	38	no	1	37	8
OTU-B.vulgatus-3	189920	Bacteroides_vulgatus	k__Bacteria; p__Bacteroidetes; c__Bacteroidia; o__Bacteroidales; f__Bacteroidaceae; g__Bacteroides; s__	28	no	1	27	6
OTU-B.vulgatus-4	577170	Bacteroides_vulgatus	k__Bacteria; p__Bacteroidetes; c__Bacteroidia; o__Bacteroidales; f__Bacteroidaceae; g__Bacteroides; s__	24	no	1	23	8
OTU-B.vulgatus-5	2949328	Bacteroides_vulgatus	k__Bacteria; p__Bacteroidetes; c__Bacteroidia; o__Bacteroidales; f__Bacteroidaceae; g__Bacteroides; s__	19	no	0	19	3
OTU-B.vulgatus-6	3600504	Bacteroides_vulgatus	k__Bacteria; p__Bacteroidetes; c__Bacteroidia; o__Bacteroidales; f__Bacteroidaceae; g__Bacteroides; s__	24	no	4	20	7
OTU-B.vulgatus-7	4357712	Bacteroides_vulgatus	k__Bacteria; p__Bacteroidetes; c__Bacteroidia; o__Bacteroidales; f__Bacteroidaceae; g__Bacteroides; s__	24	no	1	23	4
OTU-B.vulgatus-8	197072	Bacteroides_vulgatus	k__Bacteria; p__Bacteroidetes; c__Bacteroidia; o__Bacteroidales; f__Bacteroidaceae; g__Bacteroides; s__uniformis	26	no	1	25	5
OTU-B.wexlerae	196942	Blautia_wexlerae	k__Bacteria; p__Firmicutes; c__Clostridia; o__Clostridiales; f__Lachnospiraceae; g__Blautia; s__	14	no	2	12	24
OTU-B.xylanisolvens-1	195157	Bacteroides_xylanisolvens	k__Bacteria; p__Bacteroidetes; c__Bacteroidia; o__Bacteroidales; f__Bacteroidaceae; g__Bacteroides; s__	21	no	1	20	3
OTU-B.xylanisolvens-2	4278525	Bacteroides_xylanisolvens	k__Bacteria; p__Bacteroidetes; c__Bacteroidia; o__Bacteroidales; f__Bacteroidaceae; g__Bacteroides; s__	30	no	2	28	5
OTU-Blautia-spp-1	196656	Blautia_AMBIGUOUS	k__Bacteria; p__Firmicutes; c__Clostridia; o__Clostridiales; f__Lachnospiraceae; g__Blautia; s__	18	no	6	12	25
OTU-Blautia-spp-2	197222	Blautia_AMBIGUOUS	k__Bacteria; p__Firmicutes; c__Clostridia; o__Clostridiales; f__Lachnospiraceae; g__Blautia; s__	16	no	3	13	23
OTU-Blautia-spp-3	197792	Blautia_AMBIGUOUS	k__Bacteria; p__Firmicutes; c__Clostridia; o__Clostridiales; f__Lachnospiraceae; g__Blautia; s__	13	no	2	11	24
OTU-C.bartlettii	606927	Clostridium_bartlettii	k__Bacteria; p__Firmicutes; c__Clostridia; o__Clostridiales; f__Peptostreptococcaceae; g__; s__	7	no	0	7	6
OTU-C.thermocellum	180563	Clostridium_thermocellum	k__Bacteria; p__Firmicutes; c__Clostridia; o__Clostridiales; f__Ruminococcaceae; g__; s__	1	no	0	1	13
OTU-Clostridium-spp	13986	Clostridium_AMBIGUOUS	k__Bacteria; p__Firmicutes; c__Clostridia; o__Clostridiales; f__Lachnospiraceae; g__; s__	23	no	0	23	3
OTU-E.eligens	2407149	Eubacterium_eligens	k__Bacteria; p__Firmicutes; c__Clostridia; o__Clostridiales; f__Lachnospiraceae; g__Lachnospira; s__	12	no	3	9	12
OTU-E.lenta	4393532	Eggerthella_lenta	k__Bacteria; p__Actinobacteria; c__Coriobacteriia; o__Coriobacteriales; f__Coriobacteriaceae; g__Eggerthella; s__lenta	21	no	11	10	24
OTU-E.rectale-1	211935	Eubacterium_rectale	k__Bacteria; p__Firmicutes; c__Clostridia; o__Clostridiales; f__Lachnospiraceae; g__; s__	14	no	3	11	8
OTU-E.rectale-2	528362	Eubacterium_rectale	k__Bacteria; p__Firmicutes; c__Clostridia; o__Clostridiales; f__Lachnospiraceae; g__Roseburia; s__	19	no	7	12	9
OTU-E.rectale-3	189674	Eubacterium_rectale	k__Bacteria; p__Firmicutes; c__Clostridia; o__Clostridiales; f__Ruminococcaceae; g__; s__	4	no	0	4	9
OTU-Enterobacteriaceae-spp-1	518002	Enterobacteriaceae_AMBIGUOUS	k__Bacteria; p__Proteobacteria; c__Gammaproteobacteria; o__Enterobacteriales; f__Enterobacteriaceae; g__; s__	4	no	0	4	4
OTU-Enterobacteriaceae-spp-2	4111715	Enterobacteriaceae_AMBIGUOUS	k__Bacteria; p__Proteobacteria; c__Gammaproteobacteria; o__Enterobacteriales; f__Enterobacteriaceae; g__; s__	11	no	0	11	8
OTU-F.plautii-1	183162	Flavonifractor_plautii	k__Bacteria; p__Firmicutes; c__Clostridia; o__Clostridiales; f__Ruminococcaceae; g__Oscillospira; s__	2	no	0	2	24
OTU-F.plautii-2	213885	Flavonifractor_plautii	k__Bacteria; p__Firmicutes; c__Clostridia; o__Clostridiales; f__Ruminococcaceae; g__Oscillospira; s__	19	no	0	19	19
OTU-F.prausnitzii-1	174818	Faecalibacterium_prausnitzii	k__Bacteria; p__Firmicutes; c__Clostridia; o__Clostridiales; f__Ruminococcaceae; g__; s__	38	no	8	30	15
OTU-F.prausnitzii-10	198198	Faecalibacterium_prausnitzii	k__Bacteria; p__Firmicutes; c__Clostridia; o__Clostridiales; f__Ruminococcaceae; g__; s__	47	no	8	39	13
OTU-F.prausnitzii-11	211907	Faecalibacterium_prausnitzii	k__Bacteria; p__Firmicutes; c__Clostridia; o__Clostridiales; f__Ruminococcaceae; g__; s__	19	no	0	19	15
OTU-F.prausnitzii-12	267718	Faecalibacterium_prausnitzii	k__Bacteria; p__Firmicutes; c__Clostridia; o__Clostridiales; f__Ruminococcaceae; g__; s__	40	no	6	34	11
OTU-F.prausnitzii-13	366794	Faecalibacterium_prausnitzii	k__Bacteria; p__Firmicutes; c__Clostridia; o__Clostridiales; f__Ruminococcaceae; g__; s__	23	no	1	22	17
OTU-F.prausnitzii-14	178056	Faecalibacterium_prausnitzii	k__Bacteria; p__Firmicutes; c__Clostridia; o__Clostridiales; f__Ruminococcaceae; g__Faecalibacterium; s__prausnitzii	25	no	3	22	15
OTU-F.prausnitzii-15	189092	Faecalibacterium_prausnitzii	k__Bacteria; p__Firmicutes; c__Clostridia; o__Clostridiales; f__Ruminococcaceae; g__Faecalibacterium; s__prausnitzii	24	no	0	24	19
OTU-F.prausnitzii-16	189937	Faecalibacterium_prausnitzii	k__Bacteria; p__Firmicutes; c__Clostridia; o__Clostridiales; f__Ruminococcaceae; g__Faecalibacterium; s__prausnitzii	31	no	2	29	20
OTU-F.prausnitzii-17	189984	Faecalibacterium_prausnitzii	k__Bacteria; p__Firmicutes; c__Clostridia; o__Clostridiales; f__Ruminococcaceae; g__Faecalibacterium; s__prausnitzii	27	no	5	22	13
OTU-F.prausnitzii-18	191660	Faecalibacterium_prausnitzii	k__Bacteria; p__Firmicutes; c__Clostridia; o__Clostridiales; f__Ruminococcaceae; g__Faecalibacterium; s__prausnitzii	26	no	0	26	14
OTU-F.prausnitzii-19	192231	Faecalibacterium_prausnitzii	k__Bacteria; p__Firmicutes; c__Clostridia; o__Clostridiales; f__Ruminococcaceae; g__Faecalibacterium; s__prausnitzii	24	no	1	23	21
OTU-F.prausnitzii-2	176994	Faecalibacterium_prausnitzii	k__Bacteria; p__Firmicutes; c__Clostridia; o__Clostridiales; f__Ruminococcaceae; g__; s__	39	no	4	35	23
OTU-F.prausnitzii-3	181754	Faecalibacterium_prausnitzii	k__Bacteria; p__Firmicutes; c__Clostridia; o__Clostridiales; f__Ruminococcaceae; g__; s__	22	no	3	19	14
OTU-F.prausnitzii-4	182577	Faecalibacterium_prausnitzii	k__Bacteria; p__Firmicutes; c__Clostridia; o__Clostridiales; f__Ruminococcaceae; g__; s__	19	no	0	19	16
OTU-F.prausnitzii-5	193008	Faecalibacterium_prausnitzii	k__Bacteria; p__Firmicutes; c__Clostridia; o__Clostridiales; f__Ruminococcaceae; g__; s__	27	no	4	23	13
OTU-F.prausnitzii-6	193644	Faecalibacterium_prausnitzii	k__Bacteria; p__Firmicutes; c__Clostridia; o__Clostridiales; f__Ruminococcaceae; g__; s__	18	no	0	18	19
OTU-F.prausnitzii-7	194672	Faecalibacterium_prausnitzii	k__Bacteria; p__Firmicutes; c__Clostridia; o__Clostridiales; f__Ruminococcaceae; g__; s__	23	no	2	21	16
OTU-F.prausnitzii-8	195651	Faecalibacterium_prausnitzii	k__Bacteria; p__Firmicutes; c__Clostridia; o__Clostridiales; f__Ruminococcaceae; g__; s__	34	no	5	29	18
OTU-F.prausnitzii-9	196957	Faecalibacterium_prausnitzii	k__Bacteria; p__Firmicutes; c__Clostridia; o__Clostridiales; f__Ruminococcaceae; g__; s__	27	no	9	18	13
OTU-F.saccharivorans-1	181903	Fusicatenibacter_saccharivorans	k__Bacteria; p__Firmicutes; c__Clostridia; o__Clostridiales; f__; g__; s__	1	no	0	1	8
OTU-F.saccharivorans-2	364227	Fusicatenibacter_saccharivorans	k__Bacteria; p__Firmicutes; c__Clostridia; o__Clostridiales; f__; g__; s__	16	no	1	15	13
OTU-H.parainfluenzae	3825935	Haemophilus_parainfluenzae	k__Bacteria; p__Proteobacteria; c__Gammaproteobacteria; o__Pasteurellales; f__Pasteurellaceae; g__; s__	12	no	0	12	3
OTU-O.valericigenes	1504042	Oscillibacter_valericigenes	k__Bacteria; p__Firmicutes; c__Clostridia; o__Clostridiales; f__Ruminococcaceae; g__Oscillospira; s__	23	no	0	23	21
OTU-P.distasonis	4365130	Parabacteroides_distasonis	k__Bacteria; p__Bacteroidetes; c__Bacteroidia; o__Bacteroidales; f__Bacteroidaceae; g__Bacteroides; s__	25	no	2	23	10
OTU-R.obeum	197282	Ruminococcus_obeum	k__Bacteria; p__Firmicutes; c__Clostridia; o__Clostridiales; f__Lachnospiraceae; g__Blautia; s__	15	no	3	12	24
OTU-R.torques-2	3021821	Ruminococcus_torques	k__Bacteria; p__Firmicutes; c__Clostridia; o__Clostridiales; f__Lachnospiraceae; g__[Ruminococcus]; s__	14	no	1	13	10
OTU-R.torques-3	4443846	Ruminococcus_torques	k__Bacteria; p__Firmicutes; c__Clostridia; o__Clostridiales; f__Lachnospiraceae; g__[Ruminococcus]; s__	20	no	5	15	20
OTU-S.enterica	299267	Salmonella_enterica	k__Bacteria; p__Proteobacteria; c__Gammaproteobacteria; o__Enterobacteriales; f__Enterobacteriaceae; g__; s__	12	no	0	12	5
OTU-S.salivarius	4392549	Streptococcus_salivarius	k__Bacteria; p__Firmicutes; c__Bacilli; o__Lactobacillales; f__Streptococcaceae; g__Streptococcus; s__	29	no	21	8	23
OTU-Streptococcus-spp-1	4320317	Streptococcus_AMBIGUOUS	k__Bacteria; p__Firmicutes; c__Bacilli; o__Lactobacillales; f__Streptococcaceae; g__Streptococcus; s__	9	no	1	8	18
OTU-Streptococcus-spp-2	4325275	Streptococcus_AMBIGUOUS	k__Bacteria; p__Firmicutes; c__Bacilli; o__Lactobacillales; f__Streptococcaceae; g__Streptococcus; s__	34	no	18	16	24
OTU-Streptococcus-spp-3	4439603	Streptococcus_AMBIGUOUS	k__Bacteria; p__Firmicutes; c__Bacilli; o__Lactobacillales; f__Streptococcaceae; g__Streptococcus; s__	9	no	5	4	20

## Sheet: Table_S3
Table S3. Significant Edges of co-occurrence analysis
Label	Co-occurrence_method	Interaction_Type	p-val	q-val	Weight
Autism->OTU-A.hadrus-2	correl_spearman	mutualExclusion	0.000301846	0.00061987	-0.62384
Autism->OTU-B.caccae	correl_spearman	copresence	0.000130846	0.000337789	0.651728
Autism->OTU-B.uniformis-1	correl_spearman	copresence	0.000705661	0.00120811	0.591913
Autism->OTU-B.uniformis-2	correl_spearman	copresence	4.95194e-09	5.76596e-08	0.840286
Autism->OTU-B.uniformis-4	correl_spearman	copresence	4.59744e-05	0.000150301	0.682516
Autism->OTU-B.vulgatus-2	correl_spearman	copresence	0.00205164	0.0026665	0.54547
Autism->OTU-B.vulgatus-4	correl_spearman	copresence	0.00189283	0.00250608	0.54926
Autism->OTU-B.vulgatus-5	correl_spearman	copresence	0.00179119	0.00240243	0.551827
Autism->OTU-B.vulgatus-7	correl_spearman	copresence	0.00178417	0.00240243	0.552009
Autism->OTU-B.vulgatus-8	correl_spearman	copresence	0.00079952	0.00130264	0.58687
Autism->OTU-Enterobacteriaceae-spp-2	correl_spearman	copresence	0.00256925	0.00312427	0.534613
Autism->OTU-F.prausnitzii-10	correl_spearman	copresence	1.02195e-06	6.20471e-06	0.766793
Autism->OTU-F.prausnitzii-11	correl_spearman	copresence	0.00063786	0.00112021	0.595924
Autism->OTU-F.prausnitzii-13	correl_spearman	copresence	0.000249021	0.000537461	0.630547
Autism->OTU-F.prausnitzii-14	correl_spearman	copresence	0.000556578	0.00100507	0.60124
Autism->OTU-F.prausnitzii-16	correl_spearman	copresence	3.2457e-06	1.66196e-05	0.744934
Autism->OTU-F.prausnitzii-18	correl_spearman	copresence	4.85317e-05	0.000154598	0.681022
Autism->OTU-F.prausnitzii-5	correl_spearman	copresence	0.000298893	0.000616648	0.624188
Autism->OTU-F.saccharivorans-2	correl_spearman	copresence	0.000507921	0.000944711	0.604748
Autism->OTU-R.obeum	correl_spearman	mutualExclusion	0.0047184	0.00478026	-0.503086
Autism->OTU-S.salivarius	correl_spearman	mutualExclusion	0.000155042	0.000381988	-0.646322
Autism->OTU-Streptococcus-spp-3	correl_spearman	mutualExclusion	0.00340787	0.00382654	-0.52038
Butyrate->OTU-E.eligens	correl_spearman	copresence	0.00117105	0.00174696	0.570845
Butyrate->OTU-F.prausnitzii-2	correl_spearman	copresence	0.0024436	0.0030146	0.537069
Butyrate->OTU-R.torques-2	correl_spearman	copresence	0.00161519	0.00222526	0.556576
OTU-A.hadrus-1->OTU-Blautia-spp-1	correl_spearman	copresence	0.000254364	0.000541879	0.629816
OTU-A.hadrus-1->OTU-Blautia-spp-2	correl_spearman	copresence	0.00021271	0.000482142	0.635909
OTU-A.hadrus-1->OTU-Blautia-spp-3	correl_spearman	copresence	0.00145214	0.00208148	0.56138
OTU-A.hadrus-1->OTU-Streptococcus-spp-1	correl_spearman	copresence	0.00327037	0.00372629	0.522499
OTU-A.hadrus-1->OTU-Streptococcus-spp-2	correl_spearman	copresence	5.67226e-05	0.000175324	0.67666
OTU-A.hadrus-2->OTU-Blautia-spp-1	correl_spearman	copresence	0.000111345	0.0003053	0.656757
OTU-A.hadrus-2->OTU-Blautia-spp-2	correl_spearman	copresence	0.000116574	0.000316576	0.655338
OTU-A.hadrus-2->OTU-Streptococcus-spp-2	correl_spearman	copresence	2.01887e-05	7.42874e-05	0.704034
OTU-A.hadrus-3->OTU-A.hadrus-1	correl_spearman	copresence	1.44107e-13	4.08303e-12	0.91482
OTU-A.hadrus-3->OTU-A.hadrus-2	correl_spearman	copresence	0	0	0.964445
OTU-A.hadrus-3->OTU-Blautia-spp-1	correl_spearman	copresence	7.84499e-05	0.000230735	0.667308
OTU-A.hadrus-3->OTU-Blautia-spp-2	correl_spearman	copresence	7.46034e-05	0.000222501	0.668784
OTU-A.hadrus-3->OTU-Streptococcus-spp-2	correl_spearman	copresence	1.89758e-05	7.13692e-05	0.705568
OTU-A.odontolyticus->OTU-A.defectiva	correl_spearman	copresence	0.00171079	0.00232295	0.553946
OTU-B.caccae->OTU-Clostridium-spp	correl_spearman	copresence	0.00305338	0.00353593	0.525997
OTU-B.dorei->OTU-A.hadrus-2	correl_spearman	mutualExclusion	0.00273133	0.0032653	-0.531589
OTU-B.longum->OTU-A.defectiva	correl_spearman	copresence	1.09524e-05	4.65475e-05	0.718694
OTU-B.longum->OTU-Streptococcus-spp-2	correl_spearman	copresence	0.000422068	0.000811669	0.611706
OTU-B.luti-3->OTU-B.thetaiotaomicron	correl_spearman	copresence	0.000995461	0.0015562	0.577783
OTU-B.luti-3->OTU-Blautia-spp-3	correl_spearman	copresence	8.4508e-12	1.9414e-10	0.892678
OTU-B.thetaiotaomicron->OTU-A.hadrus-1	correl_spearman	copresence	0.00183692	0.00244656	0.550657
OTU-B.thetaiotaomicron->OTU-A.hadrus-2	correl_spearman	copresence	0.000392216	0.000766398	0.614411
OTU-B.thetaiotaomicron->OTU-A.hadrus-3	correl_spearman	copresence	0.00110882	0.00168346	0.573197
OTU-B.thetaiotaomicron->OTU-Streptococcus-spp-1	correl_spearman	copresence	3.72099e-06	1.8715e-05	0.742162
OTU-B.uniformis-1->OTU-A.hadrus-2	correl_spearman	mutualExclusion	0.00130172	0.00190114	-0.566232
OTU-B.uniformis-1->OTU-B.fragilis	correl_spearman	copresence	9.80661e-08	7.64735e-07	0.803806
OTU-B.uniformis-1->OTU-B.stercoris	correl_spearman	copresence	0.00265845	0.00320978	0.53293
OTU-B.uniformis-2->OTU-A.hadrus-2	correl_spearman	mutualExclusion	0.000719997	0.00122399	-0.591108
OTU-B.uniformis-2->OTU-B.dorei	correl_spearman	copresence	2.8701e-05	0.000101649	0.695101
OTU-B.uniformis-2->OTU-B.fragilis	correl_spearman	copresence	2.88237e-11	5.84946e-10	0.884572
OTU-B.uniformis-2->OTU-B.stercoris	correl_spearman	copresence	0.0020735	0.00268261	0.544968
OTU-B.uniformis-2->OTU-B.thetaiotaomicron	correl_spearman	mutualExclusion	0.00257777	0.00312568	-0.534451
OTU-B.uniformis-2->OTU-Clostridium-spp	correl_spearman	copresence	4.89257e-05	0.000154598	0.680798
OTU-B.uniformis-3->OTU-B.fragilis	correl_spearman	copresence	1.08271e-05	4.62464e-05	0.718959
OTU-B.uniformis-3->OTU-Clostridium-spp	correl_spearman	copresence	7.27437e-08	5.93569e-07	0.807933
OTU-B.uniformis-4->OTU-B.fragilis	correl_spearman	copresence	2.13087e-09	2.62499e-08	0.848921
OTU-B.uniformis-4->OTU-B.stercoris	correl_spearman	copresence	0.000318424	0.00064443	0.621944
OTU-B.uniformis-5->OTU-B.dorei	correl_spearman	copresence	4.74699e-06	2.3459e-05	0.737117
OTU-B.uniformis-5->OTU-Clostridium-spp	correl_spearman	copresence	1.84413e-05	6.9667e-05	0.706272
OTU-B.uniformis-6->OTU-B.uniformis-4	correl_spearman	copresence	2.73709e-06	1.43613e-05	0.748333
OTU-B.uniformis-6->OTU-B.uniformis-5	correl_spearman	copresence	1.84413e-05	6.9667e-05	0.706272
OTU-B.vulgatus-1->OTU-B.caccae	correl_spearman	copresence	8.00249e-06	3.61815e-05	0.725817
OTU-B.vulgatus-1->OTU-B.uniformis-2	correl_spearman	copresence	0.0021318	0.00272486	0.543649
OTU-B.vulgatus-2->OTU-B.caccae	correl_spearman	copresence	1.95248e-06	1.08471e-05	0.754885
OTU-B.vulgatus-2->OTU-B.dorei	correl_spearman	copresence	4.15712e-08	3.68078e-07	0.815352
OTU-B.vulgatus-2->OTU-B.fragilis	correl_spearman	copresence	1.22195e-06	7.2129e-06	0.763587
OTU-B.vulgatus-2->OTU-B.uniformis-2	correl_spearman	copresence	1.31311e-06	7.65629e-06	0.762279
OTU-B.vulgatus-2->OTU-B.uniformis-5	correl_spearman	copresence	2.87189e-08	2.68253e-07	0.820045
OTU-B.vulgatus-2->OTU-B.vulgatus-1	correl_spearman	copresence	0.00174373	0.00236015	0.553068
OTU-B.vulgatus-2->OTU-Clostridium-spp	correl_spearman	copresence	0.000235093	0.000517692	0.632519
OTU-B.vulgatus-3->OTU-B.caccae	correl_spearman	copresence	7.47722e-06	3.47302e-05	0.727324
OTU-B.vulgatus-3->OTU-B.dorei	correl_spearman	copresence	2.00344e-07	1.43103e-06	0.793435
OTU-B.vulgatus-3->OTU-B.fragilis	correl_spearman	copresence	1.3376e-09	1.74917e-08	0.853425
OTU-B.vulgatus-3->OTU-B.uniformis-2	correl_spearman	copresence	7.70783e-12	1.81991e-10	0.893256
OTU-B.vulgatus-3->OTU-Clostridium-spp	correl_spearman	copresence	2.30299e-06	1.24684e-05	0.751713
OTU-B.vulgatus-4->OTU-B.caccae	correl_spearman	copresence	3.83147e-08	3.50188e-07	0.816401
OTU-B.vulgatus-4->OTU-B.dorei	correl_spearman	copresence	7.33499e-08	5.93569e-07	0.80782
OTU-B.vulgatus-4->OTU-B.fragilis	correl_spearman	copresence	2.14727e-06	1.18518e-05	0.753065
OTU-B.vulgatus-4->OTU-B.uniformis-2	correl_spearman	copresence	7.62815e-07	4.80291e-06	0.77191
OTU-B.vulgatus-4->OTU-B.uniformis-5	correl_spearman	copresence	1.07324e-07	8.29325e-07	0.802536
OTU-B.vulgatus-4->OTU-B.vulgatus-1	correl_spearman	copresence	0.00138726	0.00201108	0.563418
OTU-B.vulgatus-4->OTU-B.vulgatus-3	correl_spearman	copresence	1.10057e-06	6.58794e-06	0.765471
OTU-B.vulgatus-4->OTU-Clostridium-spp	correl_spearman	copresence	0.000172124	0.000416825	0.64293
OTU-B.vulgatus-5->OTU-B.caccae	correl_spearman	copresence	1.44862e-06	8.26397e-06	0.760478
OTU-B.vulgatus-5->OTU-B.dorei	correl_spearman	copresence	0.000152217	0.000376117	0.646914
OTU-B.vulgatus-5->OTU-B.fragilis	correl_spearman	copresence	8.63878e-05	0.000248073	0.664452
OTU-B.vulgatus-5->OTU-B.uniformis-2	correl_spearman	copresence	0.000548989	0.00099569	0.601769
OTU-B.vulgatus-6->OTU-B.caccae	correl_spearman	copresence	3.96118e-11	7.48222e-10	0.882342
OTU-B.vulgatus-6->OTU-B.dorei	correl_spearman	copresence	0.00018712	0.000441812	0.640184
OTU-B.vulgatus-6->OTU-B.fragilis	correl_spearman	copresence	0.0011299	0.0017059	0.572388
OTU-B.vulgatus-6->OTU-B.stercoris	correl_spearman	copresence	0.000129409	0.000337044	0.652076
OTU-B.vulgatus-6->OTU-B.vulgatus-1	correl_spearman	copresence	0.000134973	0.000342962	0.650748
OTU-B.vulgatus-6->OTU-B.vulgatus-3	correl_spearman	copresence	0.000426922	0.000819151	0.611282
OTU-B.vulgatus-6->OTU-B.vulgatus-5	correl_spearman	copresence	6.71044e-05	0.00020155	0.671862
OTU-B.vulgatus-7->OTU-B.caccae	correl_spearman	copresence	1.89848e-13	5.20551e-12	0.913518
OTU-B.vulgatus-7->OTU-B.dorei	correl_spearman	copresence	9.67052e-06	4.23708e-05	0.72155
OTU-B.vulgatus-7->OTU-B.fragilis	correl_spearman	copresence	9.1033e-07	5.63178e-06	0.768836
OTU-B.vulgatus-7->OTU-B.uniformis-1	correl_spearman	copresence	7.12107e-06	3.32577e-05	0.7284
OTU-B.vulgatus-7->OTU-B.uniformis-2	correl_spearman	copresence	4.58996e-06	2.28156e-05	0.737822
OTU-B.vulgatus-7->OTU-B.uniformis-3	correl_spearman	copresence	8.91036e-05	0.00025501	0.663527
OTU-B.vulgatus-7->OTU-B.uniformis-4	correl_spearman	copresence	3.50456e-07	2.3831e-06	0.784787
OTU-B.vulgatus-7->OTU-B.uniformis-5	correl_spearman	copresence	9.83325e-06	4.28629e-05	0.72117
OTU-B.vulgatus-7->OTU-B.uniformis-6	correl_spearman	copresence	0.000776355	0.00127518	0.588066
OTU-B.vulgatus-7->OTU-Clostridium-spp	correl_spearman	copresence	0.000776355	0.00127518	0.588066
OTU-B.vulgatus-8->OTU-B.caccae	correl_spearman	copresence	1.0194e-06	6.20471e-06	0.766837
OTU-B.vulgatus-8->OTU-B.dorei	correl_spearman	copresence	1.97291e-10	3.1055e-09	0.870179
OTU-B.vulgatus-8->OTU-B.fragilis	correl_spearman	copresence	8.65974e-15	2.94431e-13	0.926789
OTU-B.vulgatus-8->OTU-B.uniformis-1	correl_spearman	copresence	6.71073e-11	1.18836e-09	0.87852
OTU-B.vulgatus-8->OTU-B.uniformis-2	correl_spearman	copresence	3.69776e-09	4.42689e-08	0.843349
OTU-B.vulgatus-8->OTU-B.uniformis-3	correl_spearman	copresence	2.52234e-08	2.38221e-07	0.821654
OTU-B.vulgatus-8->OTU-B.uniformis-4	correl_spearman	copresence	1.26565e-14	4.13772e-13	0.92527
OTU-B.vulgatus-8->OTU-B.uniformis-5	correl_spearman	copresence	1.21758e-10	2.02931e-09	0.874002
OTU-B.vulgatus-8->OTU-B.uniformis-6	correl_spearman	copresence	1.10795e-07	8.33417e-07	0.802086
OTU-B.vulgatus-8->OTU-B.vulgatus-3	correl_spearman	copresence	2.66454e-15	1.02575e-13	0.931196
OTU-B.vulgatus-8->OTU-B.vulgatus-5	correl_spearman	copresence	1.43046e-05	5.84562e-05	0.712424
OTU-B.vulgatus-8->OTU-B.vulgatus-7	correl_spearman	copresence	1.70959e-09	2.16888e-08	0.851074
OTU-B.wexlerae->OTU-A.hadrus-3	correl_spearman	copresence	0.000158449	0.000389019	0.645621
OTU-B.wexlerae->OTU-A.odontolyticus	correl_spearman	copresence	0.00140687	0.00202684	0.562794
OTU-B.wexlerae->OTU-B.luti-3	correl_spearman	copresence	0	0	0.946446
OTU-B.wexlerae->OTU-Streptococcus-spp-2	correl_spearman	copresence	0.000120003	0.000322545	0.654437
OTU-B.xylanisolvens-1->OTU-B.dorei	correl_spearman	copresence	0.000968131	0.00151829	0.578954
OTU-B.xylanisolvens-1->OTU-B.fragilis	correl_spearman	copresence	0.000199288	0.00045659	0.638092
OTU-B.xylanisolvens-1->OTU-B.uniformis-1	correl_spearman	copresence	0.000144256	0.000359582	0.648635
OTU-B.xylanisolvens-1->OTU-B.uniformis-6	correl_spearman	copresence	4.8674e-05	0.000154598	0.680941
OTU-B.xylanisolvens-1->OTU-B.vulgatus-2	correl_spearman	copresence	0.000400964	0.000779907	0.613601
OTU-B.xylanisolvens-1->OTU-B.vulgatus-5	correl_spearman	copresence	0.000731506	0.00123614	0.59047
OTU-B.xylanisolvens-1->OTU-B.vulgatus-6	correl_spearman	copresence	3.27524e-05	0.000114096	0.691648
OTU-B.xylanisolvens-1->OTU-B.vulgatus-7	correl_spearman	copresence	1.92928e-10	3.09412e-09	0.87036
OTU-B.xylanisolvens-1->OTU-B.vulgatus-8	correl_spearman	copresence	1.72254e-06	9.69642e-06	0.757255
OTU-B.xylanisolvens-2->OTU-B.dorei	correl_spearman	copresence	0.000252673	0.000539629	0.630046
OTU-B.xylanisolvens-2->OTU-B.fragilis	correl_spearman	copresence	5.16276e-05	0.000162531	0.679303
OTU-B.xylanisolvens-2->OTU-B.vulgatus-2	correl_spearman	copresence	2.5229e-06	1.35726e-05	0.749936
OTU-B.xylanisolvens-2->OTU-B.vulgatus-8	correl_spearman	copresence	1.18297e-06	7.03161e-06	0.764173
OTU-B.xylanisolvens-2->OTU-Clostridium-spp	correl_spearman	copresence	0.00294985	0.00347282	0.527739
OTU-B.xylanisolvens-2->OTU-Streptococcus-spp-2	correl_spearman	mutualExclusion	0.00437096	0.00455308	-0.507242
OTU-Blautia-spp-1->OTU-A.odontolyticus	correl_spearman	copresence	0.000188329	0.000442092	0.639971
OTU-Blautia-spp-1->OTU-Streptococcus-spp-2	correl_spearman	copresence	1.92913e-05	7.22361e-05	0.705161
OTU-Blautia-spp-2->OTU-A.odontolyticus	correl_spearman	copresence	0.000944828	0.00149276	0.579975
OTU-Blautia-spp-2->OTU-Streptococcus-spp-1	correl_spearman	copresence	0.00467955	0.00475223	0.503538
OTU-Blautia-spp-2->OTU-Streptococcus-spp-2	correl_spearman	copresence	1.58694e-05	6.33287e-05	0.709932
OTU-Blautia-spp-3->OTU-A.odontolyticus	correl_spearman	copresence	0.00157937	0.00221338	0.557596
OTU-Blautia-spp-3->OTU-Streptococcus-spp-2	correl_spearman	copresence	2.9528e-05	0.000103714	0.694363
OTU-C.bartlettii->OTU-B.vulgatus-8	correl_spearman	copresence	0.00161116	0.00222526	0.55669
OTU-C.bartlettii->OTU-Clostridium-spp	correl_spearman	copresence	2.63217e-06	1.39834e-05	0.749104
OTU-E.eligens->OTU-Streptococcus-spp-3	correl_spearman	mutualExclusion	1.58201e-05	6.33287e-05	-0.710007
OTU-E.lenta->OTU-B.uniformis-2	correl_spearman	mutualExclusion	0.00350934	0.0038952	-0.518861
OTU-E.lenta->OTU-Blautia-spp-2	correl_spearman	copresence	0.00336913	0.00378804	0.52097
OTU-E.rectale-1->OTU-B.longum	correl_spearman	mutualExclusion	1.1426e-05	4.83189e-05	-0.717713
OTU-E.rectale-1->OTU-E.lenta	correl_spearman	mutualExclusion	0.00242415	0.00299931	-0.537458
OTU-E.rectale-1->OTU-Streptococcus-spp-2	correl_spearman	mutualExclusion	0.00425146	0.004478	-0.508734
OTU-E.rectale-2->OTU-B.longum	correl_spearman	mutualExclusion	7.75586e-06	3.56351e-05	-0.726513
OTU-E.rectale-2->OTU-Streptococcus-spp-1	correl_spearman	mutualExclusion	0.00271093	0.00325582	-0.531962
OTU-E.rectale-2->OTU-Streptococcus-spp-2	correl_spearman	mutualExclusion	0.000482633	0.000901621	-0.606686
OTU-E.rectale-3->OTU-C.thermocellum	correl_spearman	copresence	0.000252632	0.000539629	0.630051
OTU-E.rectale-3->OTU-E.rectale-1	correl_spearman	copresence	0.000203849	0.000463294	0.637336
OTU-E.rectale-3->OTU-E.rectale-2	correl_spearman	copresence	0.000271558	0.000572765	0.627549
OTU-F.plautii-2->OTU-B.uniformis-2	correl_spearman	copresence	0.000677863	0.00117583	0.593516
OTU-F.plautii-2->OTU-B.uniformis-3	correl_spearman	copresence	0.0036979	0.00405053	0.516132
OTU-F.plautii-2->OTU-B.uniformis-5	correl_spearman	copresence	0.000696131	0.00119538	0.592457
OTU-F.plautii-2->OTU-F.plautii-1	correl_spearman	copresence	0.000245058	0.000534101	0.631098
OTU-F.plautii-2->OTU-F.prausnitzii-1	correl_spearman	copresence	0.00234572	0.00293215	0.539055
OTU-F.plautii-2->OTU-F.prausnitzii-2	correl_spearman	copresence	0.000723384	0.00122535	0.590919
OTU-F.plautii-2->OTU-F.prausnitzii-5	correl_spearman	copresence	0.000894912	0.00142449	0.582236
OTU-F.prausnitzii-1->OTU-B.fragilis	correl_spearman	copresence	0.00489436	0.00492332	0.501075
OTU-F.prausnitzii-1->OTU-E.lenta	correl_spearman	mutualExclusion	9.94674e-05	0.000278643	-0.660209
OTU-F.prausnitzii-1->OTU-E.rectale-2	correl_spearman	copresence	0.0015005	0.00212217	0.55991
OTU-F.prausnitzii-10->OTU-B.caccae	correl_spearman	copresence	0.00375995	0.00410264	0.515259
OTU-F.prausnitzii-10->OTU-B.fragilis	correl_spearman	copresence	0.00206392	0.00267429	0.545187
OTU-F.prausnitzii-10->OTU-B.stercoris	correl_spearman	copresence	0.000586791	0.00104784	0.599191
OTU-F.prausnitzii-10->OTU-B.uniformis-1	correl_spearman	copresence	0.0039142	0.00423098	0.51314
OTU-F.prausnitzii-10->OTU-B.vulgatus-1	correl_spearman	copresence	0.000592264	0.0010554	0.59883
OTU-F.prausnitzii-10->OTU-B.vulgatus-2	correl_spearman	copresence	0.00196302	0.00257893	0.547553
OTU-F.prausnitzii-10->OTU-B.vulgatus-8	correl_spearman	copresence	0.00419049	0.00442474	0.509509
OTU-F.prausnitzii-10->OTU-E.rectale-2	correl_spearman	copresence	0.00068529	0.00118153	0.593082
OTU-F.prausnitzii-10->OTU-F.prausnitzii-1	correl_spearman	copresence	7.12726e-09	7.66857e-08	0.836353
OTU-F.prausnitzii-10->OTU-F.prausnitzii-2	correl_spearman	copresence	1.04305e-12	2.55335e-11	0.904877
OTU-F.prausnitzii-10->OTU-F.prausnitzii-4	correl_spearman	copresence	0.00141217	0.00203104	0.562627
OTU-F.prausnitzii-10->OTU-F.prausnitzii-5	correl_spearman	copresence	1.05138e-12	2.55335e-11	0.904835
OTU-F.prausnitzii-10->OTU-F.prausnitzii-6	correl_spearman	copresence	0.000556924	0.00100507	0.601216
OTU-F.prausnitzii-10->OTU-F.prausnitzii-7	correl_spearman	copresence	0.000382245	0.000752102	0.615354
OTU-F.prausnitzii-10->OTU-F.prausnitzii-8	correl_spearman	copresence	1.37514e-06	7.95149e-06	0.761435
OTU-F.prausnitzii-10->OTU-F.prausnitzii-9	correl_spearman	copresence	1.08509e-07	8.30926e-07	0.802381
OTU-F.prausnitzii-11->OTU-Enterobacteriaceae-spp-2	correl_spearman	copresence	0.00308281	0.00356031	0.525511
OTU-F.prausnitzii-11->OTU-F.prausnitzii-7	correl_spearman	copresence	5.59751e-09	6.34385e-08	0.838976
OTU-F.prausnitzii-12->OTU-A.defectiva	correl_spearman	mutualExclusion	0.000778989	0.0012758	-0.587929
OTU-F.prausnitzii-12->OTU-A.hadrus-2	correl_spearman	mutualExclusion	0.00405181	0.00433928	-0.511306
OTU-F.prausnitzii-12->OTU-B.fragilis	correl_spearman	copresence	0.0020805	0.00268758	0.544808
OTU-F.prausnitzii-12->OTU-B.longum	correl_spearman	mutualExclusion	0.000391058	0.000765896	-0.61452
OTU-F.prausnitzii-12->OTU-B.uniformis-1	correl_spearman	copresence	0.00331404	0.00375592	0.521818
OTU-F.prausnitzii-12->OTU-B.vulgatus-1	correl_spearman	copresence	0.00426772	0.00448955	0.508529
OTU-F.prausnitzii-12->OTU-B.vulgatus-2	correl_spearman	copresence	0.0011091	0.00168346	0.573186
OTU-F.prausnitzii-12->OTU-B.vulgatus-8	correl_spearman	copresence	0.00460598	0.00471129	0.504402
OTU-F.prausnitzii-12->OTU-C.bartlettii	correl_spearman	copresence	0.00202338	0.00264189	0.546126
OTU-F.prausnitzii-12->OTU-F.prausnitzii-1	correl_spearman	copresence	2.09722e-07	1.48553e-06	0.792745
OTU-F.prausnitzii-12->OTU-F.prausnitzii-2	correl_spearman	copresence	7.6166e-07	4.80291e-06	0.771936
OTU-F.prausnitzii-12->OTU-F.prausnitzii-5	correl_spearman	copresence	8.93501e-06	3.99724e-05	0.723344
OTU-F.prausnitzii-12->OTU-F.prausnitzii-6	correl_spearman	copresence	0.00400834	0.00430188	0.511879
OTU-F.prausnitzii-12->OTU-F.prausnitzii-7	correl_spearman	copresence	0.00253492	0.00309581	0.535274
OTU-F.prausnitzii-12->OTU-F.prausnitzii-8	correl_spearman	copresence	3.08553e-06	1.59921e-05	0.74595
OTU-F.prausnitzii-12->OTU-F.prausnitzii-9	correl_spearman	copresence	0.000250841	0.00053842	0.630297
OTU-F.prausnitzii-13->OTU-B.longum	correl_spearman	mutualExclusion	0.00406383	0.00433952	-0.511148
OTU-F.prausnitzii-13->OTU-B.vulgatus-2	correl_spearman	copresence	0.00169624	0.00231429	0.554338
OTU-F.prausnitzii-13->OTU-E.eligens	correl_spearman	copresence	0.00125381	0.00184188	0.567876
OTU-F.prausnitzii-13->OTU-Enterobacteriaceae-spp-2	correl_spearman	copresence	0.000901429	0.00142951	0.581934
OTU-F.prausnitzii-13->OTU-F.prausnitzii-11	correl_spearman	copresence	1.14536e-08	1.17296e-07	0.831033
OTU-F.prausnitzii-13->OTU-F.prausnitzii-12	correl_spearman	copresence	0.00242056	0.00299924	0.53753
OTU-F.prausnitzii-14->OTU-B.vulgatus-1	correl_spearman	copresence	0.00313074	0.00360098	0.524727
OTU-F.prausnitzii-14->OTU-B.vulgatus-7	correl_spearman	copresence	0.00376999	0.00410832	0.515119
OTU-F.prausnitzii-14->OTU-F.prausnitzii-12	correl_spearman	copresence	0.000182575	0.000433488	0.640996
OTU-F.prausnitzii-14->OTU-F.prausnitzii-2	correl_spearman	copresence	9.97641e-06	4.3265e-05	0.720839
OTU-F.prausnitzii-14->OTU-F.prausnitzii-5	correl_spearman	copresence	8.83214e-11	1.50146e-09	0.876463
OTU-F.prausnitzii-14->OTU-F.prausnitzii-9	correl_spearman	copresence	6.37999e-09	7.13552e-08	0.837563
OTU-F.prausnitzii-14->OTU-Streptococcus-spp-2	correl_spearman	mutualExclusion	0.000765371	0.00126569	-0.588644
OTU-F.prausnitzii-15->OTU-B.vulgatus-2	correl_spearman	copresence	0.000437252	0.000837082	0.610392
OTU-F.prausnitzii-15->OTU-F.prausnitzii-11	correl_spearman	copresence	2.93629e-05	0.000103562	0.694509
OTU-F.prausnitzii-15->OTU-F.prausnitzii-12	correl_spearman	copresence	0.000305584	0.000625895	0.623405
OTU-F.prausnitzii-15->OTU-F.prausnitzii-13	correl_spearman	copresence	0.00183924	0.00244656	0.550599
OTU-F.prausnitzii-16->OTU-B.fragilis	correl_spearman	copresence	0.00212171	0.00272014	0.543875
OTU-F.prausnitzii-16->OTU-B.stercoris	correl_spearman	copresence	0.00351392	0.0038952	0.518793
OTU-F.prausnitzii-16->OTU-B.uniformis-2	correl_spearman	copresence	0.000130764	0.000337789	0.651748
OTU-F.prausnitzii-16->OTU-B.uniformis-4	correl_spearman	copresence	0.00309013	0.00356393	0.52539
OTU-F.prausnitzii-16->OTU-B.uniformis-5	correl_spearman	copresence	0.0034899	0.00388345	0.519149
OTU-F.prausnitzii-16->OTU-B.vulgatus-1	correl_spearman	copresence	0.00368237	0.00403872	0.516353
OTU-F.prausnitzii-16->OTU-F.prausnitzii-12	correl_spearman	copresence	1.31508e-06	7.65629e-06	0.762252
OTU-F.prausnitzii-16->OTU-F.prausnitzii-14	correl_spearman	copresence	0.000287265	0.000597005	0.625584
OTU-F.prausnitzii-16->OTU-F.prausnitzii-2	correl_spearman	copresence	2.29037e-06	1.24684e-05	0.751819
OTU-F.prausnitzii-16->OTU-F.prausnitzii-5	correl_spearman	copresence	7.77285e-05	0.000229407	0.66758
OTU-F.prausnitzii-16->OTU-F.prausnitzii-6	correl_spearman	copresence	0.00106619	0.00163682	0.574873
OTU-F.prausnitzii-16->OTU-F.prausnitzii-7	correl_spearman	copresence	0.00013426	0.000342962	0.650915
OTU-F.prausnitzii-16->OTU-F.prausnitzii-9	correl_spearman	copresence	0.000995969	0.0015562	0.577761
OTU-F.prausnitzii-17->OTU-B.caccae	correl_spearman	copresence	0.00272394	0.00326106	0.531724
OTU-F.prausnitzii-17->OTU-B.vulgatus-1	correl_spearman	copresence	0.000580516	0.00103882	0.599609
OTU-F.prausnitzii-17->OTU-Blautia-spp-2	correl_spearman	mutualExclusion	0.0047118	0.00477927	-0.503162
OTU-F.prausnitzii-17->OTU-E.rectale-2	correl_spearman	copresence	0.000692548	0.00119163	0.592663
OTU-F.prausnitzii-17->OTU-F.prausnitzii-1	correl_spearman	copresence	0.000451177	0.000856028	0.609221
OTU-F.prausnitzii-17->OTU-F.prausnitzii-12	correl_spearman	copresence	0.000291764	0.000603406	0.625038
OTU-F.prausnitzii-17->OTU-F.prausnitzii-14	correl_spearman	copresence	1.63729e-09	2.10863e-08	0.851492
OTU-F.prausnitzii-17->OTU-F.prausnitzii-16	correl_spearman	copresence	0.000309668	0.000629707	0.622935
OTU-F.prausnitzii-17->OTU-F.prausnitzii-2	correl_spearman	copresence	5.34539e-06	2.62635e-05	0.734606
OTU-F.prausnitzii-17->OTU-F.prausnitzii-3	correl_spearman	copresence	1.71162e-08	1.71162e-07	0.826346
OTU-F.prausnitzii-17->OTU-F.prausnitzii-5	correl_spearman	copresence	3.18634e-13	8.20724e-12	0.911005
OTU-F.prausnitzii-17->OTU-F.prausnitzii-6	correl_spearman	copresence	0.00205886	0.00267181	0.545303
OTU-F.prausnitzii-17->OTU-F.prausnitzii-8	correl_spearman	copresence	0.000352191	0.000704383	0.618329
OTU-F.prausnitzii-17->OTU-F.prausnitzii-9	correl_spearman	copresence	1.74238e-09	2.17797e-08	0.85089
OTU-F.prausnitzii-18->OTU-B.stercoris	correl_spearman	copresence	0.00336228	0.00378535	0.521074
OTU-F.prausnitzii-18->OTU-B.uniformis-2	correl_spearman	copresence	0.000756674	0.00125865	0.589106
OTU-F.prausnitzii-18->OTU-F.prausnitzii-12	correl_spearman	copresence	4.50144e-07	2.94325e-06	0.780754
OTU-F.prausnitzii-18->OTU-F.prausnitzii-14	correl_spearman	copresence	0.00360061	0.00395928	0.517525
OTU-F.prausnitzii-18->OTU-F.prausnitzii-16	correl_spearman	copresence	6.96764e-11	1.20867e-09	0.878241
OTU-F.prausnitzii-18->OTU-F.prausnitzii-5	correl_spearman	copresence	0.000754801	0.001258	0.589207
OTU-F.prausnitzii-18->OTU-F.prausnitzii-6	correl_spearman	copresence	0.000243578	0.000533612	0.631306
OTU-F.prausnitzii-18->OTU-F.prausnitzii-7	correl_spearman	copresence	5.55405e-05	0.000172928	0.677254
OTU-F.prausnitzii-19->OTU-B.uniformis-2	correl_spearman	copresence	0.00231509	0.0029024	0.539691
OTU-F.prausnitzii-19->OTU-B.uniformis-4	correl_spearman	copresence	0.00193633	0.00255176	0.548196
OTU-F.prausnitzii-19->OTU-B.uniformis-5	correl_spearman	copresence	0.00170935	0.00232295	0.553984
OTU-F.prausnitzii-19->OTU-Enterobacteriaceae-spp-2	correl_spearman	copresence	0.00072368	0.00122535	0.590903
OTU-F.prausnitzii-19->OTU-F.prausnitzii-1	correl_spearman	copresence	1.82382e-06	1.0199e-05	0.756178
OTU-F.prausnitzii-19->OTU-F.prausnitzii-11	correl_spearman	copresence	2.77556e-15	1.02575e-13	0.931011
OTU-F.prausnitzii-19->OTU-F.prausnitzii-12	correl_spearman	copresence	0.00283875	0.00337474	0.529666
OTU-F.prausnitzii-19->OTU-F.prausnitzii-13	correl_spearman	copresence	2.89032e-11	5.84946e-10	0.884553
OTU-F.prausnitzii-19->OTU-F.prausnitzii-16	correl_spearman	copresence	0.00060702	0.0010727	0.597869
OTU-F.prausnitzii-19->OTU-F.prausnitzii-18	correl_spearman	copresence	2.37363e-05	8.54908e-05	0.699971
OTU-F.prausnitzii-19->OTU-F.prausnitzii-2	correl_spearman	copresence	1.02064e-05	4.40377e-05	0.720318
OTU-F.prausnitzii-19->OTU-F.prausnitzii-4	correl_spearman	copresence	9.0046e-09	9.44927e-08	0.83376
OTU-F.prausnitzii-19->OTU-F.prausnitzii-6	correl_spearman	copresence	1.19255e-05	4.96895e-05	0.716716
OTU-F.prausnitzii-19->OTU-F.prausnitzii-7	correl_spearman	copresence	4.43442e-10	6.73082e-09	0.863415
OTU-F.prausnitzii-19->OTU-F.prausnitzii-8	correl_spearman	copresence	9.99838e-05	0.000278643	0.660052
OTU-F.prausnitzii-19->OTU-Streptococcus-spp-3	correl_spearman	mutualExclusion	0.00466569	0.0047518	-0.5037
OTU-F.prausnitzii-2->OTU-B.fragilis	correl_spearman	copresence	0.0045689	0.00468464	0.504842
OTU-F.prausnitzii-2->OTU-B.uniformis-6	correl_spearman	copresence	0.00415244	0.00439548	0.509997
OTU-F.prausnitzii-2->OTU-Clostridium-spp	correl_spearman	copresence	0.00415244	0.00439548	0.509997
OTU-F.prausnitzii-2->OTU-E.eligens	correl_spearman	copresence	0.00123753	0.00182305	0.568447
OTU-F.prausnitzii-2->OTU-Streptococcus-spp-2	correl_spearman	mutualExclusion	0.00105819	0.00162945	-0.575194
OTU-F.prausnitzii-3->OTU-B.thetaiotaomicron	correl_spearman	mutualExclusion	0.000740378	0.00124372	-0.589985
OTU-F.prausnitzii-3->OTU-B.vulgatus-1	correl_spearman	copresence	0.00163201	0.00224467	0.556104
OTU-F.prausnitzii-3->OTU-F.prausnitzii-2	correl_spearman	copresence	3.82196e-07	2.53802e-06	0.783402
OTU-F.prausnitzii-3->OTU-Streptococcus-spp-2	correl_spearman	mutualExclusion	0.000158811	0.000389019	-0.645547
OTU-F.prausnitzii-5->OTU-B.stercoris	correl_spearman	copresence	0.00133529	0.00194349	0.565109
OTU-F.prausnitzii-5->OTU-B.thetaiotaomicron	correl_spearman	mutualExclusion	0.00224628	0.00282865	-0.541145
OTU-F.prausnitzii-5->OTU-B.vulgatus-1	correl_spearman	copresence	0.00134691	0.00195705	0.564727
OTU-F.prausnitzii-5->OTU-Blautia-spp-1	correl_spearman	mutualExclusion	0.00359099	0.00395381	-0.517665
OTU-F.prausnitzii-5->OTU-F.prausnitzii-2	correl_spearman	copresence	1.97001e-08	1.92472e-07	0.824664
OTU-F.prausnitzii-5->OTU-Streptococcus-spp-2	correl_spearman	mutualExclusion	6.54504e-05	0.000197982	-0.672581
OTU-F.prausnitzii-6->OTU-F.prausnitzii-1	correl_spearman	copresence	0.000143767	0.000359418	0.648743
OTU-F.prausnitzii-6->OTU-F.prausnitzii-2	correl_spearman	copresence	4.78402e-07	3.10413e-06	0.779758
OTU-F.prausnitzii-6->OTU-F.prausnitzii-3	correl_spearman	copresence	0.000369106	0.00073133	0.616629
OTU-F.prausnitzii-6->OTU-F.prausnitzii-4	correl_spearman	copresence	1.17137e-05	4.90476e-05	0.717134
OTU-F.prausnitzii-7->OTU-B.vulgatus-2	correl_spearman	copresence	0.00111258	0.00168573	0.573052
OTU-F.prausnitzii-7->OTU-E.eligens	correl_spearman	copresence	0.000200173	0.000457385	0.637944
OTU-F.prausnitzii-7->OTU-Enterobacteriaceae-spp-2	correl_spearman	copresence	0.000412968	0.000795969	0.612513
OTU-F.prausnitzii-7->OTU-F.prausnitzii-2	correl_spearman	copresence	1.6448e-05	6.50405e-05	0.709065
OTU-F.prausnitzii-7->OTU-F.prausnitzii-4	correl_spearman	copresence	3.35772e-06	1.70902e-05	0.74425
OTU-F.prausnitzii-8->OTU-B.fragilis	correl_spearman	copresence	0.00316595	0.00363165	0.524157
OTU-F.prausnitzii-8->OTU-B.thetaiotaomicron	correl_spearman	mutualExclusion	0.00146802	0.00209014	-0.560893
OTU-F.prausnitzii-8->OTU-B.uniformis-2	correl_spearman	copresence	0.00106682	0.00163682	0.574848
OTU-F.prausnitzii-8->OTU-B.uniformis-4	correl_spearman	copresence	0.0042347	0.00446588	0.508946
OTU-F.prausnitzii-8->OTU-B.uniformis-5	correl_spearman	copresence	0.00366807	0.00402824	0.516556
OTU-F.prausnitzii-8->OTU-E.lenta	correl_spearman	mutualExclusion	0.000238062	0.000522876	-0.63209
OTU-F.prausnitzii-8->OTU-F.prausnitzii-1	correl_spearman	copresence	2.37588e-14	7.47961e-13	0.922753
OTU-F.prausnitzii-8->OTU-F.prausnitzii-2	correl_spearman	copresence	1.35305e-10	2.21171e-09	0.873179
OTU-F.prausnitzii-8->OTU-F.prausnitzii-3	correl_spearman	copresence	0.000827734	0.00134527	0.585453
OTU-F.prausnitzii-8->OTU-F.prausnitzii-4	correl_spearman	copresence	0.000199035	0.00045659	0.638135
OTU-F.prausnitzii-8->OTU-F.prausnitzii-5	correl_spearman	copresence	4.25678e-05	0.000141339	0.684623
OTU-F.prausnitzii-8->OTU-F.prausnitzii-7	correl_spearman	copresence	4.04201e-05	0.000135799	0.686029
OTU-F.prausnitzii-9->OTU-B.stercoris	correl_spearman	copresence	0.00251222	0.00307693	0.535715
OTU-F.prausnitzii-9->OTU-B.thetaiotaomicron	correl_spearman	mutualExclusion	0.0032933	0.00373739	-0.52214
OTU-F.prausnitzii-9->OTU-B.vulgatus-1	correl_spearman	copresence	0.00240492	0.00298785	0.537846
OTU-F.prausnitzii-9->OTU-Blautia-spp-1	correl_spearman	mutualExclusion	0.00233303	0.00292058	-0.539318
OTU-F.prausnitzii-9->OTU-Blautia-spp-2	correl_spearman	mutualExclusion	0.00314298	0.00361018	-0.524528
OTU-F.prausnitzii-9->OTU-Blautia-spp-3	correl_spearman	mutualExclusion	0.00301918	0.00351777	-0.526567
OTU-F.prausnitzii-9->OTU-E.lenta	correl_spearman	mutualExclusion	0.00210206	0.00270147	-0.544318
OTU-F.prausnitzii-9->OTU-E.rectale-2	correl_spearman	copresence	0.000119899	0.000322545	0.654464
OTU-F.prausnitzii-9->OTU-F.prausnitzii-2	correl_spearman	copresence	1.69347e-05	6.6334e-05	0.708357
OTU-F.saccharivorans-2->OTU-E.eligens	correl_spearman	copresence	0.000221952	0.00049921	0.634473
OTU-F.saccharivorans-2->OTU-Enterobacteriaceae-spp-1	correl_spearman	copresence	0.000403018	0.000782113	0.613413
OTU-F.saccharivorans-2->OTU-Enterobacteriaceae-spp-2	correl_spearman	copresence	4.82083e-05	0.000154598	0.681207
OTU-F.saccharivorans-2->OTU-F.prausnitzii-10	correl_spearman	copresence	0.000575341	0.00103391	0.599957
OTU-F.saccharivorans-2->OTU-F.prausnitzii-12	correl_spearman	copresence	0.00444884	0.00460599	0.506287
OTU-F.saccharivorans-2->OTU-F.prausnitzii-13	correl_spearman	copresence	0.00393974	0.00424433	0.512795
OTU-F.saccharivorans-2->OTU-F.prausnitzii-19	correl_spearman	copresence	0.00407301	0.00434386	0.511028
OTU-F.saccharivorans-2->OTU-F.prausnitzii-2	correl_spearman	copresence	0.000176907	0.00042598	0.642033
OTU-F.saccharivorans-2->OTU-F.prausnitzii-3	correl_spearman	copresence	7.69505e-05	0.000227902	0.667876
OTU-F.saccharivorans-2->OTU-F.prausnitzii-9	correl_spearman	copresence	0.00218182	0.00277212	0.542542
OTU-F.saccharivorans-2->OTU-F.saccharivorans-1	correl_spearman	copresence	3.83363e-05	0.000129824	0.687457
OTU-F.saccharivorans-2->OTU-Streptococcus-spp-3	correl_spearman	mutualExclusion	6.30631e-06	3.01144e-05	-0.731054
OTU-H.parainfluenzae->OTU-B.caccae	correl_spearman	copresence	0.000117167	0.000317172	0.655181
OTU-H.parainfluenzae->OTU-B.uniformis-4	correl_spearman	copresence	0.00216839	0.00275918	0.542837
OTU-H.parainfluenzae->OTU-B.vulgatus-4	correl_spearman	copresence	0.00431608	0.00452609	0.507923
OTU-H.parainfluenzae->OTU-B.vulgatus-6	correl_spearman	copresence	0.000968131	0.00151829	0.578954
OTU-H.parainfluenzae->OTU-Enterobacteriaceae-spp-2	correl_spearman	copresence	4.67398e-05	0.000152218	0.682061
OTU-O.valericigenes->OTU-B.uniformis-3	correl_spearman	copresence	0.000748683	0.00125026	0.589535
OTU-O.valericigenes->OTU-B.uniformis-5	correl_spearman	copresence	0.00347284	0.00387899	0.519403
OTU-O.valericigenes->OTU-B.vulgatus-2	correl_spearman	copresence	0.00244148	0.0030146	0.537111
OTU-O.valericigenes->OTU-B.vulgatus-3	correl_spearman	copresence	0.00371492	0.00406394	0.515892
OTU-O.valericigenes->OTU-B.vulgatus-8	correl_spearman	copresence	0.002714	0.00325582	0.531905
OTU-O.valericigenes->OTU-Clostridium-spp	correl_spearman	copresence	0.00279911	0.00333228	0.530369
OTU-O.valericigenes->OTU-F.plautii-1	correl_spearman	copresence	3.68552e-05	0.00012683	0.688513
OTU-O.valericigenes->OTU-F.plautii-2	correl_spearman	copresence	0.00019311	0.000450944	0.63914
OTU-O.valericigenes->OTU-F.prausnitzii-11	correl_spearman	copresence	0.00177866	0.00239978	0.552152
OTU-O.valericigenes->OTU-F.prausnitzii-18	correl_spearman	copresence	0.00139749	0.00201675	0.563092
OTU-O.valericigenes->OTU-F.prausnitzii-2	correl_spearman	copresence	0.000549386	0.00099569	0.601742
OTU-O.valericigenes->OTU-F.prausnitzii-7	correl_spearman	copresence	0.0049717	0.00497578	0.500211
OTU-P.distasonis->OTU-B.caccae	correl_spearman	copresence	2.37149e-05	8.54908e-05	0.699994
OTU-P.distasonis->OTU-B.uniformis-1	correl_spearman	copresence	0.000170724	0.000415803	0.643197
OTU-P.distasonis->OTU-B.uniformis-2	correl_spearman	copresence	7.69576e-10	1.07236e-08	0.858543
OTU-P.distasonis->OTU-B.uniformis-3	correl_spearman	copresence	0.000224992	0.000503271	0.634013
OTU-P.distasonis->OTU-B.uniformis-4	correl_spearman	copresence	1.95504e-05	7.28851e-05	0.704831
OTU-P.distasonis->OTU-B.uniformis-5	correl_spearman	copresence	0.000120952	0.0003233	0.654192
OTU-P.distasonis->OTU-B.vulgatus-2	correl_spearman	copresence	0.00117149	0.00174696	0.570829
OTU-P.distasonis->OTU-B.vulgatus-3	correl_spearman	copresence	8.33018e-06	3.74638e-05	0.72492
OTU-P.distasonis->OTU-B.vulgatus-4	correl_spearman	copresence	0.000594761	0.00105763	0.598666
OTU-P.distasonis->OTU-B.vulgatus-6	correl_spearman	copresence	0.00161389	0.00222526	0.556613
OTU-P.distasonis->OTU-B.vulgatus-7	correl_spearman	copresence	0.000283031	0.000589649	0.626104
OTU-P.distasonis->OTU-B.vulgatus-8	correl_spearman	copresence	0.000246487	0.000535842	0.630899
OTU-P.distasonis->OTU-B.xylanisolvens-1	correl_spearman	copresence	0.00290998	0.0034354	0.528424
OTU-P.distasonis->OTU-B.xylanisolvens-2	correl_spearman	copresence	1.64514e-05	6.50405e-05	0.70906
OTU-P.distasonis->OTU-E.lenta	correl_spearman	mutualExclusion	0.00442797	0.00458997	-0.506542
OTU-P.distasonis->OTU-F.prausnitzii-10	correl_spearman	copresence	0.00230266	0.00289107	0.539951
OTU-P.distasonis->OTU-F.prausnitzii-15	correl_spearman	copresence	0.0020438	0.00266446	0.545651
OTU-P.distasonis->OTU-F.prausnitzii-18	correl_spearman	copresence	0.00332971	0.00376363	0.521575
OTU-R.obeum->OTU-A.hadrus-1	correl_spearman	copresence	0.00148369	0.00210671	0.560417
OTU-R.obeum->OTU-A.hadrus-2	correl_spearman	copresence	0.0006806	0.00117583	0.593356
OTU-R.obeum->OTU-A.hadrus-3	correl_spearman	copresence	0.000336727	0.000678241	0.619946
OTU-R.obeum->OTU-B.thetaiotaomicron	correl_spearman	copresence	0.000250245	0.00053842	0.630378
OTU-R.obeum->OTU-Blautia-spp-1	correl_spearman	copresence	0	0	0.971715
OTU-R.obeum->OTU-Blautia-spp-2	correl_spearman	copresence	0	0	0.977675
OTU-R.obeum->OTU-Blautia-spp-3	correl_spearman	copresence	0	0	0.967077
OTU-R.obeum->OTU-F.prausnitzii-9	correl_spearman	mutualExclusion	0.00170431	0.00232158	-0.55412
OTU-R.torques-2->OTU-B.thetaiotaomicron	correl_spearman	mutualExclusion	0.00480643	0.00485786	-0.502072
OTU-R.torques-2->OTU-C.bartlettii	correl_spearman	copresence	5.1952e-05	0.000162949	0.679128
OTU-R.torques-2->OTU-F.prausnitzii-1	correl_spearman	copresence	0.000456805	0.00086436	0.608757
OTU-R.torques-2->OTU-F.prausnitzii-10	correl_spearman	copresence	0.00236808	0.00295575	0.538595
OTU-R.torques-2->OTU-F.prausnitzii-12	correl_spearman	copresence	0.00146778	0.00209014	0.5609
OTU-R.torques-2->OTU-F.prausnitzii-2	correl_spearman	copresence	5.65201e-05	0.000175324	0.676761
OTU-R.torques-2->OTU-F.prausnitzii-6	correl_spearman	copresence	0.00179193	0.00240243	0.551808
OTU-R.torques-2->OTU-F.prausnitzii-8	correl_spearman	copresence	6.59451e-05	0.000198771	0.672364
OTU-R.torques-2->OTU-O.valericigenes	correl_spearman	copresence	0.00390883	0.00423098	0.513212
OTU-R.torques-3->OTU-B.fragilis	correl_spearman	copresence	0.00255809	0.00311962	0.534827
OTU-R.torques-3->OTU-B.thetaiotaomicron	correl_spearman	mutualExclusion	0.000953317	0.00150338	-0.579601
OTU-R.torques-3->OTU-B.uniformis-6	correl_spearman	copresence	0.00139119	0.00201108	0.563292
OTU-R.torques-3->OTU-C.bartlettii	correl_spearman	copresence	0.00210103	0.00270147	0.544341
OTU-R.torques-3->OTU-E.lenta	correl_spearman	mutualExclusion	0.00349054	0.00388345	-0.51914
OTU-R.torques-3->OTU-F.prausnitzii-1	correl_spearman	copresence	0.000223081	0.000500314	0.634302
OTU-R.torques-3->OTU-F.prausnitzii-2	correl_spearman	copresence	9.94908e-05	0.000278643	0.660202
OTU-R.torques-3->OTU-R.torques-2	correl_spearman	copresence	1.08097e-06	6.5165e-06	0.765792
OTU-S.enterica->OTU-Enterobacteriaceae-spp-1	correl_spearman	copresence	6.35131e-05	0.000193499	0.673444
OTU-S.enterica->OTU-Enterobacteriaceae-spp-2	correl_spearman	copresence	9.14337e-07	5.63178e-06	0.768758
OTU-S.enterica->OTU-F.prausnitzii-10	correl_spearman	copresence	0.00256895	0.00312427	0.534619
OTU-S.enterica->OTU-F.prausnitzii-13	correl_spearman	copresence	0.000579762	0.00103882	0.59966
OTU-S.enterica->OTU-F.prausnitzii-18	correl_spearman	copresence	0.00118987	0.00176507	0.570155
OTU-S.enterica->OTU-F.prausnitzii-2	correl_spearman	copresence	0.00352401	0.0038952	0.518644
OTU-S.enterica->OTU-F.prausnitzii-7	correl_spearman	copresence	1.53149e-05	6.22854e-05	0.710789
OTU-S.salivarius->OTU-A.hadrus-2	correl_spearman	copresence	0.000960031	0.00151116	0.579306
OTU-S.salivarius->OTU-A.hadrus-3	correl_spearman	copresence	0.00156547	0.00220306	0.557996
OTU-S.salivarius->OTU-A.odontolyticus	correl_spearman	copresence	0.000166664	0.000407082	0.643982
OTU-S.salivarius->OTU-B.caccae	correl_spearman	mutualExclusion	0.00012029	0.000322545	-0.654363
OTU-S.salivarius->OTU-B.thetaiotaomicron	correl_spearman	copresence	0.00100952	0.00156995	0.577191
OTU-S.salivarius->OTU-E.eligens	correl_spearman	mutualExclusion	0.00220076	0.00278785	-0.542128
OTU-S.salivarius->OTU-E.lenta	correl_spearman	copresence	0.00237171	0.00295595	0.538521
OTU-S.salivarius->OTU-F.prausnitzii-8	correl_spearman	mutualExclusion	0.00158322	0.00221338	-0.557485
OTU-S.salivarius->OTU-Streptococcus-spp-3	correl_spearman	copresence	0.0032014	0.00366737	0.523589
OTU-Streptococcus-spp-2->OTU-A.defectiva	correl_spearman	copresence	0.00439693	0.00456894	0.506922
OTU-Streptococcus-spp-2->OTU-A.odontolyticus	correl_spearman	copresence	0.00100249	0.00156351	0.577486
